# Supplementary material for: Dynamic prostate cancer transcriptome analysis delineates the trajectory to disease progression
Source: PubMed Central journal article supplement (PMC8640014; doi:10.1038/s41467-021-26840-5), 2021-12-02
Supplement: 41467_2021_26840_MOESM2_ESM.pdf [file 41467_2021_26840_MOESM2_ESM.pdf]

## **Description of Additional Supplementary Files**

File Name: Supplementary Data 1

Description: Clinical annotations

File Name: Supplementary Data 2

Description: Correlations between stroma-score and top 5 principal components

File Name: Supplementary Data 3

Description: List of Primers
