# Supplementary material for: Dynamic prostate cancer transcriptome analysis delineates the trajectory to disease progression
Source: Nat Commun. 2021 Dec 2;12:7033. doi: 10.1038/s41467-021-26840-5 (PMC8640014; doi:10.1038/s41467-021-26840-5)
Supplement: Supplementary file 3 — Supplementary Data 1 [file 41467_2021_26840_MOESM3_ESM.xlsx]

## Sheet: Supplementary Table S1
	Entry	Dataset	Patient ID	Sample ID	Sample Type	Ethnicity	Diagnosis Age	Biopsy Age	PSA Level (at Diagonosis for CRPC)	Gleason Score	Gleason Score of initial Primary Tumor	Library Type	Tumor Tissue site	Primary Tumor Laterality	Patient Primary Tumor Localization	Tumor Level	Lymph Node Status	American Join Committee on cancer Lymph Node Stage	pathologic_T	American Join Committee on cancer Clinical Primary Tumor T stage	Recurrence Indicator	Days to Recurrence	ERG fusion	ETV1 fusion	ETV3 fusion	ETV4 fusion
	1	GSE120795	SRR7961228	SRR7961228	NORMAL	NA	NA	NA	NA	NA	NA	TotalRNA	PROSTATE	NA	NA	NA	NA	NA	NA	NA	NA	NA	NA	NA	NA	NA
	2	GSE120795	SRR7961229	SRR7961229	NORMAL	NA	NA	NA	NA	NA	NA	TotalRNA	PROSTATE	NA	NA	NA	NA	NA	NA	NA	NA	NA	NA	NA	NA	NA
	3	GSE120795	SRR7961230	SRR7961230	NORMAL	NA	NA	NA	NA	NA	NA	TotalRNA	PROSTATE	NA	NA	NA	NA	NA	NA	NA	NA	NA	NA	NA	NA	NA
	4	GSE120795	SRR7961323	SRR7961323	NORMAL	NA	NA	NA	NA	NA	NA	TotalRNA	PROSTATE	NA	NA	NA	NA	NA	NA	NA	NA	NA	NA	NA	NA	NA
	5	GSE120795	SRR7961327	SRR7961327	NORMAL	NA	NA	NA	NA	NA	NA	TotalRNA	PROSTATE	NA	NA	NA	NA	NA	NA	NA	NA	NA	NA	NA	NA	NA
	6	GSE120795	SRR7961336	SRR7961336	NORMAL	NA	NA	NA	NA	NA	NA	TotalRNA	PROSTATE	NA	NA	NA	NA	NA	NA	NA	NA	NA	NA	NA	NA	NA
	7	GTEX	SRR657809	SRR657809	NORMAL	BLACK	NA	67	NA	NA	NA	TotalRNA	PROSTATE	NA	NA	NA	NA	NA	NA	NA	NA	NA	NA	NA	NA	NA
	8	GTEX	SRR661052	SRR661052	NORMAL	WHITE	NA	25	NA	NA	NA	TotalRNA	PROSTATE	NA	NA	NA	NA	NA	NA	NA	NA	NA	NA	NA	NA	NA
	9	GTEX	SRR815280	SRR815280	NORMAL	BLACK	NA	49	NA	NA	NA	TotalRNA	PROSTATE	NA	NA	NA	NA	NA	NA	NA	NA	NA	NA	NA	NA	NA
	10	GTEX	SRR815542	SRR815542	NORMAL	WHITE	NA	58	NA	NA	NA	TotalRNA	PROSTATE	NA	NA	NA	NA	NA	NA	NA	NA	NA	NA	NA	NA	NA
	11	GTEX	SRR815845	SRR815845	NORMAL	BLACK	NA	61	NA	NA	NA	TotalRNA	PROSTATE	NA	NA	NA	NA	NA	NA	NA	NA	NA	NA	NA	NA	NA
	12	GTEX	SRR816818	SRR816818	NORMAL	WHITE	NA	48	NA	NA	NA	TotalRNA	PROSTATE	NA	NA	NA	NA	NA	NA	NA	NA	NA	NA	NA	NA	NA
	13	GTEX	SRR816969	SRR816969	NORMAL	WHITE	NA	36	NA	NA	NA	TotalRNA	PROSTATE	NA	NA	NA	NA	NA	NA	NA	NA	NA	NA	NA	NA	NA
	14	GTEX	SRR5125442	SRR5125442	NORMAL	WHITE	NA	36	NA	NA	NA	TotalRNA	PROSTATE	NA	NA	NA	NA	NA	NA	NA	NA	NA	NA	NA	NA	NA
	15	GTEX	SRR820234	SRR820234	NORMAL	WHITE	NA	40	NA	NA	NA	TotalRNA	PROSTATE	NA	NA	NA	NA	NA	NA	NA	NA	NA	NA	NA	NA	NA
	16	GTEX	SRR1069209	SRR1069209	NORMAL	WHITE	NA	42	NA	NA	NA	TotalRNA	PROSTATE	NA	NA	NA	NA	NA	NA	NA	NA	NA	NA	NA	NA	NA
	17	GTEX	SRR1069514	SRR1069514	NORMAL	WHITE	NA	50	NA	NA	NA	TotalRNA	PROSTATE	NA	NA	NA	NA	NA	NA	NA	NA	NA	NA	NA	NA	NA
	18	GTEX	SRR1073069	SRR1073069	NORMAL	WHITE	NA	26	NA	NA	NA	TotalRNA	PROSTATE	NA	NA	NA	NA	NA	NA	NA	NA	NA	NA	NA	NA	NA
	19	GTEX	SRR1074410	SRR1074410	NORMAL	WHITE	NA	41	NA	NA	NA	TotalRNA	PROSTATE	NA	NA	NA	NA	NA	NA	NA	NA	NA	NA	NA	NA	NA
	20	GTEX	SRR1075126	SRR1075126	NORMAL	WHITE	NA	62	NA	NA	NA	TotalRNA	PROSTATE	NA	NA	NA	NA	NA	NA	NA	NA	NA	NA	NA	NA	NA
	21	GTEX	SRR1075530	SRR1075530	NORMAL	WHITE	NA	59	NA	NA	NA	TotalRNA	PROSTATE	NA	NA	NA	NA	NA	NA	NA	NA	NA	NA	NA	NA	NA
	22	GTEX	SRR1076120	SRR1076120	NORMAL	WHITE	NA	39	NA	NA	NA	TotalRNA	PROSTATE	NA	NA	NA	NA	NA	NA	NA	NA	NA	NA	NA	NA	NA
	23	GTEX	SRR1077429	SRR1077429	NORMAL	WHITE	NA	28	NA	NA	NA	TotalRNA	PROSTATE	NA	NA	NA	NA	NA	NA	NA	NA	NA	NA	NA	NA	NA
	24	GTEX	SRR1078164	SRR1078164	NORMAL	WHITE	NA	51	NA	NA	NA	TotalRNA	PROSTATE	NA	NA	NA	NA	NA	NA	NA	NA	NA	NA	NA	NA	NA
	25	GTEX	SRR1078684	SRR1078684	NORMAL	WHITE	NA	48	NA	NA	NA	TotalRNA	PROSTATE	NA	NA	NA	NA	NA	NA	NA	NA	NA	NA	NA	NA	NA
	26	GTEX	SRR1078855	SRR1078855	NORMAL	WHITE	NA	64	NA	NA	NA	TotalRNA	PROSTATE	NA	NA	NA	NA	NA	NA	NA	NA	NA	NA	NA	NA	NA
	27	GTEX	SRR1080318	SRR1080318	NORMAL	WHITE	NA	22	NA	NA	NA	TotalRNA	PROSTATE	NA	NA	NA	NA	NA	NA	NA	NA	NA	NA	NA	NA	NA
	28	GTEX	SRR1080696	SRR1080696	NORMAL	WHITE	NA	68	NA	NA	NA	TotalRNA	PROSTATE	NA	NA	NA	NA	NA	NA	NA	NA	NA	NA	NA	NA	NA
	29	GTEX	SRR1081789	SRR1081789	NORMAL	WHITE	NA	60	NA	NA	NA	TotalRNA	PROSTATE	NA	NA	NA	NA	NA	NA	NA	NA	NA	NA	NA	NA	NA
	30	GTEX	SRR1082496	SRR1082496	NORMAL	WHITE	NA	70	NA	NA	NA	TotalRNA	PROSTATE	NA	NA	NA	NA	NA	NA	NA	NA	NA	NA	NA	NA	NA
	31	GTEX	SRR1083732	SRR1083732	NORMAL	WHITE	NA	47	NA	NA	NA	TotalRNA	PROSTATE	NA	NA	NA	NA	NA	NA	NA	NA	NA	NA	NA	NA	NA
	32	GTEX	SRR1086441	SRR1086441	NORMAL	WHITE	NA	49	NA	NA	NA	TotalRNA	PROSTATE	NA	NA	NA	NA	NA	NA	NA	NA	NA	NA	NA	NA	NA
	33	GTEX	SRR1086514	SRR1086514	NORMAL	WHITE	NA	55	NA	NA	NA	TotalRNA	PROSTATE	NA	NA	NA	NA	NA	NA	NA	NA	NA	NA	NA	NA	NA
	34	GTEX	SRR1086869	SRR1086869	NORMAL	WHITE	NA	31	NA	NA	NA	TotalRNA	PROSTATE	NA	NA	NA	NA	NA	NA	NA	NA	NA	NA	NA	NA	NA
	35	GTEX	SRR1091645	SRR1091645	NORMAL	WHITE	NA	38	NA	NA	NA	TotalRNA	PROSTATE	NA	NA	NA	NA	NA	NA	NA	NA	NA	NA	NA	NA	NA
	36	GTEX	SRR1091990	SRR1091990	NORMAL	WHITE	NA	21	NA	NA	NA	TotalRNA	PROSTATE	NA	NA	NA	NA	NA	NA	NA	NA	NA	NA	NA	NA	NA
	37	GTEX	SRR1092444	SRR1092444	NORMAL	WHITE	NA	44	NA	NA	NA	TotalRNA	PROSTATE	NA	NA	NA	NA	NA	NA	NA	NA	NA	NA	NA	NA	NA
	38	GTEX	SRR1092468	SRR1092468	NORMAL	WHITE	NA	60	NA	NA	NA	TotalRNA	PROSTATE	NA	NA	NA	NA	NA	NA	NA	NA	NA	NA	NA	NA	NA
	39	GTEX	SRR1092636	SRR1092636	NORMAL	WHITE	NA	43	NA	NA	NA	TotalRNA	PROSTATE	NA	NA	NA	NA	NA	NA	NA	NA	NA	NA	NA	NA	NA
	40	GTEX	SRR1092913	SRR1092913	NORMAL	WHITE	NA	51	NA	NA	NA	TotalRNA	PROSTATE	NA	NA	NA	NA	NA	NA	NA	NA	NA	NA	NA	NA	NA
	41	GTEX	SRR1093075	SRR1093075	NORMAL	WHITE	NA	59	NA	NA	NA	TotalRNA	PROSTATE	NA	NA	NA	NA	NA	NA	NA	NA	NA	NA	NA	NA	NA
	42	GTEX	SRR1093697	SRR1093697	NORMAL	WHITE	NA	27	NA	NA	NA	TotalRNA	PROSTATE	NA	NA	NA	NA	NA	NA	NA	NA	NA	NA	NA	NA	NA
	43	GTEX	SRR1096081	SRR1096081	NORMAL	BLACK	NA	61	NA	NA	NA	TotalRNA	PROSTATE	NA	NA	NA	NA	NA	NA	NA	NA	NA	NA	NA	NA	NA
	44	GTEX	SRR1097344	SRR1097344	NORMAL	WHITE	NA	53	NA	NA	NA	TotalRNA	PROSTATE	NA	NA	NA	NA	NA	NA	NA	NA	NA	NA	NA	NA	NA
	45	GTEX	SRR1098686	SRR1098686	NORMAL	WHITE	NA	49	NA	NA	NA	TotalRNA	PROSTATE	NA	NA	NA	NA	NA	NA	NA	NA	NA	NA	NA	NA	NA
	46	GTEX	SRR1099402	SRR1099402	NORMAL	WHITE	NA	44	NA	NA	NA	TotalRNA	PROSTATE	NA	NA	NA	NA	NA	NA	NA	NA	NA	NA	NA	NA	NA
	47	GTEX	SRR1105441	SRR1105441	NORMAL	WHITE	NA	45	NA	NA	NA	TotalRNA	PROSTATE	NA	NA	NA	NA	NA	NA	NA	NA	NA	NA	NA	NA	NA
	48	GTEX	SRR1308860	SRR1308860	NORMAL	ASIAN	NA	55	NA	NA	NA	TotalRNA	PROSTATE	NA	NA	NA	NA	NA	NA	NA	NA	NA	NA	NA	NA	NA
	49	GTEX	SRR1310939	SRR1310939	NORMAL	WHITE	NA	48	NA	NA	NA	TotalRNA	PROSTATE	NA	NA	NA	NA	NA	NA	NA	NA	NA	NA	NA	NA	NA
	50	GTEX	SRR1312002	SRR1312002	NORMAL	WHITE	NA	27	NA	NA	NA	TotalRNA	PROSTATE	NA	NA	NA	NA	NA	NA	NA	NA	NA	NA	NA	NA	NA
	51	GTEX	SRR1315353	SRR1315353	NORMAL	WHITE	NA	63	NA	NA	NA	TotalRNA	PROSTATE	NA	NA	NA	NA	NA	NA	NA	NA	NA	NA	NA	NA	NA
	52	GTEX	SRR1317751	SRR1317751	NORMAL	WHITE	NA	53	NA	NA	NA	TotalRNA	PROSTATE	NA	NA	NA	NA	NA	NA	NA	NA	NA	NA	NA	NA	NA
	53	GTEX	SRR1323699	SRR1323699	NORMAL	WHITE	NA	59	NA	NA	NA	TotalRNA	PROSTATE	NA	NA	NA	NA	NA	NA	NA	NA	NA	NA	NA	NA	NA
	54	GTEX	SRR1324314	SRR1324314	NORMAL	WHITE	NA	38	NA	NA	NA	TotalRNA	PROSTATE	NA	NA	NA	NA	NA	NA	NA	NA	NA	NA	NA	NA	NA
	55	GTEX	SRR1326100	SRR1326100	NORMAL	WHITE	NA	60	NA	NA	NA	TotalRNA	PROSTATE	NA	NA	NA	NA	NA	NA	NA	NA	NA	NA	NA	NA	NA
	56	GTEX	SRR1332360	SRR1332360	NORMAL	WHITE	NA	37	NA	NA	NA	TotalRNA	PROSTATE	NA	NA	NA	NA	NA	NA	NA	NA	NA	NA	NA	NA	NA
	57	GTEX	SRR1335605	SRR1335605	NORMAL	BLACK	NA	47	NA	NA	NA	TotalRNA	PROSTATE	NA	NA	NA	NA	NA	NA	NA	NA	NA	NA	NA	NA	NA
	58	GTEX	SRR1335964	SRR1335964	NORMAL	NA	NA	68	NA	NA	NA	TotalRNA	PROSTATE	NA	NA	NA	NA	NA	NA	NA	NA	NA	NA	NA	NA	NA
	59	GTEX	SRR1338079	SRR1338079	NORMAL	WHITE	NA	54	NA	NA	NA	TotalRNA	PROSTATE	NA	NA	NA	NA	NA	NA	NA	NA	NA	NA	NA	NA	NA
	60	GTEX	SRR1340345	SRR1340345	NORMAL	WHITE	NA	54	NA	NA	NA	TotalRNA	PROSTATE	NA	NA	NA	NA	NA	NA	NA	NA	NA	NA	NA	NA	NA
	61	GTEX	SRR1340721	SRR1340721	NORMAL	BLACK	NA	52	NA	NA	NA	TotalRNA	PROSTATE	NA	NA	NA	NA	NA	NA	NA	NA	NA	NA	NA	NA	NA
	62	GTEX	SRR1340943	SRR1340943	NORMAL	WHITE	NA	55	NA	NA	NA	TotalRNA	PROSTATE	NA	NA	NA	NA	NA	NA	NA	NA	NA	NA	NA	NA	NA
	63	GTEX	SRR1344294	SRR1344294	NORMAL	WHITE	NA	53	NA	NA	NA	TotalRNA	PROSTATE	NA	NA	NA	NA	NA	NA	NA	NA	NA	NA	NA	NA	NA
	64	GTEX	SRR1347343	SRR1347343	NORMAL	WHITE	NA	63	NA	NA	NA	TotalRNA	PROSTATE	NA	NA	NA	NA	NA	NA	NA	NA	NA	NA	NA	NA	NA
	65	GTEX	SRR1348531	SRR1348531	NORMAL	WHITE	NA	53	NA	NA	NA	TotalRNA	PROSTATE	NA	NA	NA	NA	NA	NA	NA	NA	NA	NA	NA	NA	NA
	66	GTEX	SRR1349809	SRR1349809	NORMAL	WHITE	NA	33	NA	NA	NA	TotalRNA	PROSTATE	NA	NA	NA	NA	NA	NA	NA	NA	NA	NA	NA	NA	NA
	67	GTEX	SRR1353418	SRR1353418	NORMAL	BLACK	NA	63	NA	NA	NA	TotalRNA	PROSTATE	NA	NA	NA	NA	NA	NA	NA	NA	NA	NA	NA	NA	NA
	68	GTEX	SRR1360056	SRR1360056	NORMAL	WHITE	NA	58	NA	NA	NA	TotalRNA	PROSTATE	NA	NA	NA	NA	NA	NA	NA	NA	NA	NA	NA	NA	NA
	69	GTEX	SRR1365013	SRR1365013	NORMAL	WHITE	NA	62	NA	NA	NA	TotalRNA	PROSTATE	NA	NA	NA	NA	NA	NA	NA	NA	NA	NA	NA	NA	NA
	70	GTEX	SRR1366985	SRR1366985	NORMAL	WHITE	NA	53	NA	NA	NA	TotalRNA	PROSTATE	NA	NA	NA	NA	NA	NA	NA	NA	NA	NA	NA	NA	NA
	71	GTEX	SRR1373964	SRR1373964	NORMAL	WHITE	NA	54	NA	NA	NA	TotalRNA	PROSTATE	NA	NA	NA	NA	NA	NA	NA	NA	NA	NA	NA	NA	NA
	72	GTEX	SRR1375866	SRR1375866	NORMAL	WHITE	NA	32	NA	NA	NA	TotalRNA	PROSTATE	NA	NA	NA	NA	NA	NA	NA	NA	NA	NA	NA	NA	NA
	73	GTEX	SRR1381396	SRR1381396	NORMAL	WHITE	NA	49	NA	NA	NA	TotalRNA	PROSTATE	NA	NA	NA	NA	NA	NA	NA	NA	NA	NA	NA	NA	NA
	74	GTEX	SRR1382553	SRR1382553	NORMAL	WHITE	NA	39	NA	NA	NA	TotalRNA	PROSTATE	NA	NA	NA	NA	NA	NA	NA	NA	NA	NA	NA	NA	NA
	75	GTEX	SRR1386910	SRR1386910	NORMAL	WHITE	NA	61	NA	NA	NA	TotalRNA	PROSTATE	NA	NA	NA	NA	NA	NA	NA	NA	NA	NA	NA	NA	NA
	76	GTEX	SRR1390094	SRR1390094	NORMAL	WHITE	NA	70	NA	NA	NA	TotalRNA	PROSTATE	NA	NA	NA	NA	NA	NA	NA	NA	NA	NA	NA	NA	NA
	77	GTEX	SRR1398251	SRR1398251	NORMAL	BLACK	NA	59	NA	NA	NA	TotalRNA	PROSTATE	NA	NA	NA	NA	NA	NA	NA	NA	NA	NA	NA	NA	NA
	78	GTEX	SRR1398815	SRR1398815	NORMAL	WHITE	NA	32	NA	NA	NA	TotalRNA	PROSTATE	NA	NA	NA	NA	NA	NA	NA	NA	NA	NA	NA	NA	NA
	79	GTEX	SRR1399113	SRR1399113	NORMAL	BLACK	NA	56	NA	NA	NA	TotalRNA	PROSTATE	NA	NA	NA	NA	NA	NA	NA	NA	NA	NA	NA	NA	NA
	80	GTEX	SRR1400100	SRR1400100	NORMAL	WHITE	NA	59	NA	NA	NA	TotalRNA	PROSTATE	NA	NA	NA	NA	NA	NA	NA	NA	NA	NA	NA	NA	NA
	81	GTEX	SRR1402261	SRR1402261	NORMAL	WHITE	NA	22	NA	NA	NA	TotalRNA	PROSTATE	NA	NA	NA	NA	NA	NA	NA	NA	NA	NA	NA	NA	NA
	82	GTEX	SRR1408703	SRR1408703	NORMAL	WHITE	NA	54	NA	NA	NA	TotalRNA	PROSTATE	NA	NA	NA	NA	NA	NA	NA	NA	NA	NA	NA	NA	NA
	83	GTEX	SRR1414332	SRR1414332	NORMAL	WHITE	NA	24	NA	NA	NA	TotalRNA	PROSTATE	NA	NA	NA	NA	NA	NA	NA	NA	NA	NA	NA	NA	NA
	84	GTEX	SRR1416636	SRR1416636	NORMAL	WHITE	NA	61	NA	NA	NA	TotalRNA	PROSTATE	NA	NA	NA	NA	NA	NA	NA	NA	NA	NA	NA	NA	NA
	85	GTEX	SRR1421159	SRR1421159	NORMAL	ASIAN	NA	64	NA	NA	NA	TotalRNA	PROSTATE	NA	NA	NA	NA	NA	NA	NA	NA	NA	NA	NA	NA	NA
	86	GTEX	SRR1430928	SRR1430928	NORMAL	WHITE	NA	24	NA	NA	NA	TotalRNA	PROSTATE	NA	NA	NA	NA	NA	NA	NA	NA	NA	NA	NA	NA	NA
	87	GTEX	SRR1431139	SRR1431139	NORMAL	WHITE	NA	53	NA	NA	NA	TotalRNA	PROSTATE	NA	NA	NA	NA	NA	NA	NA	NA	NA	NA	NA	NA	NA
	88	GTEX	SRR1432014	SRR1432014	NORMAL	WHITE	NA	64	NA	NA	NA	TotalRNA	PROSTATE	NA	NA	NA	NA	NA	NA	NA	NA	NA	NA	NA	NA	NA
	89	GTEX	SRR1433329	SRR1433329	NORMAL	WHITE	NA	60	NA	NA	NA	TotalRNA	PROSTATE	NA	NA	NA	NA	NA	NA	NA	NA	NA	NA	NA	NA	NA
	90	GTEX	SRR1434228	SRR1434228	NORMAL	WHITE	NA	61	NA	NA	NA	TotalRNA	PROSTATE	NA	NA	NA	NA	NA	NA	NA	NA	NA	NA	NA	NA	NA
	91	GTEX	SRR1434545	SRR1434545	NORMAL	WHITE	NA	55	NA	NA	NA	TotalRNA	PROSTATE	NA	NA	NA	NA	NA	NA	NA	NA	NA	NA	NA	NA	NA
	92	GTEX	SRR1435667	SRR1435667	NORMAL	WHITE	NA	69	NA	NA	NA	TotalRNA	PROSTATE	NA	NA	NA	NA	NA	NA	NA	NA	NA	NA	NA	NA	NA
	93	GTEX	SRR1436021	SRR1436021	NORMAL	WHITE	NA	57	NA	NA	NA	TotalRNA	PROSTATE	NA	NA	NA	NA	NA	NA	NA	NA	NA	NA	NA	NA	NA
	94	GTEX	SRR1437143	SRR1437143	NORMAL	WHITE	NA	65	NA	NA	NA	TotalRNA	PROSTATE	NA	NA	NA	NA	NA	NA	NA	NA	NA	NA	NA	NA	NA
	95	GTEX	SRR1437163	SRR1437163	NORMAL	NA	NA	67	NA	NA	NA	TotalRNA	PROSTATE	NA	NA	NA	NA	NA	NA	NA	NA	NA	NA	NA	NA	NA
	96	GTEX	SRR1441178	SRR1441178	NORMAL	WHITE	NA	46	NA	NA	NA	TotalRNA	PROSTATE	NA	NA	NA	NA	NA	NA	NA	NA	NA	NA	NA	NA	NA
	97	GTEX	SRR1441804	SRR1441804	NORMAL	WHITE	NA	44	NA	NA	NA	TotalRNA	PROSTATE	NA	NA	NA	NA	NA	NA	NA	NA	NA	NA	NA	NA	NA
	98	GTEX	SRR1442612	SRR1442612	NORMAL	WHITE	NA	60	NA	NA	NA	TotalRNA	PROSTATE	NA	NA	NA	NA	NA	NA	NA	NA	NA	NA	NA	NA	NA
	99	GTEX	SRR1443137	SRR1443137	NORMAL	WHITE	NA	44	NA	NA	NA	TotalRNA	PROSTATE	NA	NA	NA	NA	NA	NA	NA	NA	NA	NA	NA	NA	NA
	100	GTEX	SRR1465375	SRR1465375	NORMAL	WHITE	NA	31	NA	NA	NA	TotalRNA	PROSTATE	NA	NA	NA	NA	NA	NA	NA	NA	NA	NA	NA	NA	NA
	101	GTEX	SRR1465480	SRR1465480	NORMAL	WHITE	NA	68	NA	NA	NA	TotalRNA	PROSTATE	NA	NA	NA	NA	NA	NA	NA	NA	NA	NA	NA	NA	NA
	102	GTEX	SRR1468118	SRR1468118	NORMAL	BLACK	NA	48	NA	NA	NA	TotalRNA	PROSTATE	NA	NA	NA	NA	NA	NA	NA	NA	NA	NA	NA	NA	NA
	103	GTEX	SRR1470253	SRR1470253	NORMAL	WHITE	NA	46	NA	NA	NA	TotalRNA	PROSTATE	NA	NA	NA	NA	NA	NA	NA	NA	NA	NA	NA	NA	NA
	104	GTEX	SRR1453005	SRR1453005	NORMAL	WHITE	NA	65	NA	NA	NA	TotalRNA	PROSTATE	NA	NA	NA	NA	NA	NA	NA	NA	NA	NA	NA	NA	NA
	105	GTEX	SRR1453434	SRR1453434	NORMAL	WHITE	NA	66	NA	NA	NA	TotalRNA	PROSTATE	NA	NA	NA	NA	NA	NA	NA	NA	NA	NA	NA	NA	NA
	106	GTEX	SRR1455413	SRR1455413	NORMAL	WHITE	NA	50	NA	NA	NA	TotalRNA	PROSTATE	NA	NA	NA	NA	NA	NA	NA	NA	NA	NA	NA	NA	NA
	107	GTEX	SRR1456611	SRR1456611	NORMAL	WHITE	NA	51	NA	NA	NA	TotalRNA	PROSTATE	NA	NA	NA	NA	NA	NA	NA	NA	NA	NA	NA	NA	NA
	108	GTEX	SRR1458198	SRR1458198	NORMAL	BLACK	NA	50	NA	NA	NA	TotalRNA	PROSTATE	NA	NA	NA	NA	NA	NA	NA	NA	NA	NA	NA	NA	NA
	109	GTEX	SRR1459465	SRR1459465	NORMAL	WHITE	NA	49	NA	NA	NA	TotalRNA	PROSTATE	NA	NA	NA	NA	NA	NA	NA	NA	NA	NA	NA	NA	NA
	110	GTEX	SRR1460409	SRR1460409	NORMAL	WHITE	NA	44	NA	NA	NA	TotalRNA	PROSTATE	NA	NA	NA	NA	NA	NA	NA	NA	NA	NA	NA	NA	NA
	111	GTEX	SRR1467149	SRR1467149	NORMAL	WHITE	NA	22	NA	NA	NA	TotalRNA	PROSTATE	NA	NA	NA	NA	NA	NA	NA	NA	NA	NA	NA	NA	NA
	112	GTEX	SRR1471178	SRR1471178	NORMAL	WHITE	NA	23	NA	NA	NA	TotalRNA	PROSTATE	NA	NA	NA	NA	NA	NA	NA	NA	NA	NA	NA	NA	NA
	113	GTEX	SRR1472863	SRR1472863	NORMAL	BLACK	NA	37	NA	NA	NA	TotalRNA	PROSTATE	NA	NA	NA	NA	NA	NA	NA	NA	NA	NA	NA	NA	NA
	114	GTEX	SRR1476507	SRR1476507	NORMAL	WHITE	NA	23	NA	NA	NA	TotalRNA	PROSTATE	NA	NA	NA	NA	NA	NA	NA	NA	NA	NA	NA	NA	NA
	115	GTEX	SRR1478679	SRR1478679	NORMAL	WHITE	NA	67	NA	NA	NA	TotalRNA	PROSTATE	NA	NA	NA	NA	NA	NA	NA	NA	NA	NA	NA	NA	NA
	116	GTEX	SRR1479062	SRR1479062	NORMAL	WHITE	NA	50	NA	NA	NA	TotalRNA	PROSTATE	NA	NA	NA	NA	NA	NA	NA	NA	NA	NA	NA	NA	NA
	117	GTEX	SRR1480083	SRR1480083	NORMAL	WHITE	NA	50	NA	NA	NA	TotalRNA	PROSTATE	NA	NA	NA	NA	NA	NA	NA	NA	NA	NA	NA	NA	NA
	118	GTEX	SRR1486348	SRR1486348	NORMAL	WHITE	NA	21	NA	NA	NA	TotalRNA	PROSTATE	NA	NA	NA	NA	NA	NA	NA	NA	NA	NA	NA	NA	NA
	119	GTEX	SRR1488770	SRR1488770	NORMAL	WHITE	NA	60	NA	NA	NA	TotalRNA	PROSTATE	NA	NA	NA	NA	NA	NA	NA	NA	NA	NA	NA	NA	NA
	120	GTEX	SRR1489631	SRR1489631	NORMAL	WHITE	NA	53	NA	NA	NA	TotalRNA	PROSTATE	NA	NA	NA	NA	NA	NA	NA	NA	NA	NA	NA	NA	NA
	121	GTEX	SRR1499215	SRR1499215	NORMAL	WHITE	NA	37	NA	NA	NA	TotalRNA	PROSTATE	NA	NA	NA	NA	NA	NA	NA	NA	NA	NA	NA	NA	NA
	122	GTEX	SRR1500089	SRR1500089	NORMAL	WHITE	NA	51	NA	NA	NA	TotalRNA	PROSTATE	NA	NA	NA	NA	NA	NA	NA	NA	NA	NA	NA	NA	NA
	123	TCGA	TCGA-G9-6384-11	TCGA-G9-6384-11	NORMAL	WHITE	NA	53	NA	NA	NA	Poly(A+)	PROSTATE	Bilateral	NA	Apex|Base	NA	NA	NA	NA	NA	NA	NA	not_fused	not_fused	not_fused
	124	TCGA	TCGA-CH-5767-11	TCGA-CH-5767-11	NORMAL	WHITE	NA	66	NA	NA	NA	Poly(A+)	PROSTATE	Bilateral	Peripheral Zone	NA	NA	NA	NA	NA	NA	NA	NA	not_fused	not_fused	not_fused
	125	TCGA	TCGA-G9-6348-11	TCGA-G9-6348-11	NORMAL	WHITE	NA	68	NA	NA	NA	Poly(A+)	PROSTATE	Bilateral	NA	Apex|Base	NA	NA	NA	NA	NA	NA	NA	not_fused	not_fused	not_fused
	126	TCGA	TCGA-G9-6356-11	TCGA-G9-6356-11	NORMAL	WHITE	NA	60	NA	NA	NA	Poly(A+)	PROSTATE	Bilateral	NA	Apex|Base	NA	NA	NA	NA	NA	NA	NA	not_fused	not_fused	fused
	127	TCGA	TCGA-G9-6365-11	TCGA-G9-6365-11	NORMAL	WHITE	NA	71	NA	NA	NA	Poly(A+)	PROSTATE	Bilateral	NA	Apex|Base	NA	NA	NA	NA	NA	NA	NA	not_fused	not_fused	not_fused
	128	TCGA	TCGA-G9-6496-11	TCGA-G9-6496-11	NORMAL	WHITE	NA	61	NA	NA	NA	Poly(A+)	PROSTATE	Bilateral	NA	Apex|Base	NA	NA	NA	NA	NA	NA	NA	not_fused	not_fused	not_fused
	129	TCGA	TCGA-CH-5768-11	TCGA-CH-5768-11	NORMAL	WHITE	NA	72	NA	NA	NA	Poly(A+)	PROSTATE	Bilateral	Overlapping	NA	NA	NA	NA	NA	NA	NA	NA	not_fused	not_fused	not_fused
	130	TCGA	TCGA-EJ-7328-11	TCGA-EJ-7328-11	NORMAL	WHITE	NA	70	NA	NA	NA	Poly(A+)	PROSTATE	Bilateral	NA	Middle|Base	NA	NA	NA	NA	NA	NA	NA	not_fused	not_fused	not_fused
	131	TCGA	TCGA-EJ-7327-11	TCGA-EJ-7327-11	NORMAL	WHITE	NA	61	NA	NA	NA	Poly(A+)	PROSTATE	Bilateral	NA	Apex|Middle|Base	NA	NA	NA	NA	NA	NA	NA	not_fused	not_fused	not_fused
	132	TCGA	TCGA-EJ-7786-11	TCGA-EJ-7786-11	NORMAL	WHITE	NA	62	NA	NA	NA	Poly(A+)	PROSTATE	Bilateral	NA	NA	NA	NA	NA	NA	NA	NA	NA	not_fused	not_fused	not_fused
	133	TCGA	TCGA-EJ-7785-11	TCGA-EJ-7785-11	NORMAL	WHITE	NA	54	NA	NA	NA	Poly(A+)	PROSTATE	Bilateral	NA	Middle|Base	NA	NA	NA	NA	NA	NA	NA	not_fused	not_fused	not_fused
	134	TCGA	TCGA-HC-7747-11	TCGA-HC-7747-11	NORMAL	WHITE	NA	52	NA	NA	NA	Poly(A+)	PROSTATE	Bilateral	NA	Apex|Middle|Base	NA	NA	NA	NA	NA	NA	NA	not_fused	not_fused	not_fused
	135	TCGA	TCGA-EJ-7789-11	TCGA-EJ-7789-11	NORMAL	BLACK	NA	66	NA	NA	NA	Poly(A+)	PROSTATE	Bilateral	NA	Base	NA	NA	NA	NA	NA	NA	NA	not_fused	not_fused	not_fused
	136	TCGA	TCGA-EJ-7123-11	TCGA-EJ-7123-11	NORMAL	WHITE	NA	59	NA	NA	NA	Poly(A+)	PROSTATE	Bilateral	NA	Apex|Middle|Base	NA	NA	NA	NA	NA	NA	NA	not_fused	not_fused	not_fused
	137	TCGA	TCGA-EJ-7315-11	TCGA-EJ-7315-11	NORMAL	WHITE	NA	68	NA	NA	NA	Poly(A+)	PROSTATE	Bilateral	NA	Apex|Middle|Base	NA	NA	NA	NA	NA	NA	NA	not_fused	not_fused	not_fused
	138	TCGA	TCGA-EJ-7781-11	TCGA-EJ-7781-11	NORMAL	WHITE	NA	65	NA	NA	NA	Poly(A+)	PROSTATE	Bilateral	NA	NA	NA	NA	NA	NA	NA	NA	NA	not_fused	not_fused	not_fused
	139	TCGA	TCGA-EJ-7783-11	TCGA-EJ-7783-11	NORMAL	WHITE	NA	70	NA	NA	NA	Poly(A+)	PROSTATE	Bilateral	NA	NA	NA	NA	NA	NA	NA	NA	NA	not_fused	not_fused	not_fused
	140	TCGA	TCGA-EJ-7314-11	TCGA-EJ-7314-11	NORMAL	WHITE	NA	62	NA	NA	NA	Poly(A+)	PROSTATE	Bilateral	NA	Apex|Middle|Base	NA	NA	NA	NA	NA	NA	NA	not_fused	not_fused	not_fused
	141	TCGA	TCGA-EJ-7794-11	TCGA-EJ-7794-11	NORMAL	WHITE	NA	67	NA	NA	NA	Poly(A+)	PROSTATE	Bilateral	NA	NA	NA	NA	NA	NA	NA	NA	NA	not_fused	not_fused	not_fused
	142	TCGA	TCGA-HC-7740-11	TCGA-HC-7740-11	NORMAL	WHITE	NA	59	NA	NA	NA	Poly(A+)	PROSTATE	Bilateral	NA	Apex|Middle|Base	NA	NA	NA	NA	NA	NA	NA	not_fused	not_fused	not_fused
	143	TCGA	TCGA-HC-7211-11	TCGA-HC-7211-11	NORMAL	WHITE	NA	62	NA	NA	NA	Poly(A+)	PROSTATE	Bilateral	NA	Apex|Middle|Base	NA	NA	NA	NA	NA	NA	NA	not_fused	not_fused	not_fused
	144	TCGA	TCGA-HC-7819-11	TCGA-HC-7819-11	NORMAL	WHITE	NA	53	NA	NA	NA	Poly(A+)	PROSTATE	Bilateral	Central Zone	NA	NA	NA	NA	NA	NA	NA	NA	not_fused	not_fused	not_fused
	145	TCGA	TCGA-EJ-7782-11	TCGA-EJ-7782-11	NORMAL	BLACK	NA	71	NA	NA	NA	Poly(A+)	PROSTATE	Bilateral	NA	NA	NA	NA	NA	NA	NA	NA	NA	not_fused	not_fused	not_fused
	146	TCGA	TCGA-HC-7752-11	TCGA-HC-7752-11	NORMAL	WHITE	NA	61	NA	NA	NA	Poly(A+)	PROSTATE	Bilateral	NA	Base	NA	NA	NA	NA	NA	NA	NA	not_fused	not_fused	not_fused
	147	TCGA	TCGA-HC-7737-11	TCGA-HC-7737-11	NORMAL	BLACK	NA	55	NA	NA	NA	Poly(A+)	PROSTATE	Bilateral	NA	NA	NA	NA	NA	NA	NA	NA	NA	not_fused	not_fused	not_fused
	148	TCGA	TCGA-EJ-7125-11	TCGA-EJ-7125-11	NORMAL	WHITE	NA	44	NA	NA	NA	Poly(A+)	PROSTATE	Bilateral	NA	Apex|Middle	NA	NA	NA	NA	NA	NA	NA	not_fused	not_fused	not_fused
	149	TCGA	TCGA-G9-6333-11	TCGA-G9-6333-11	NORMAL	WHITE	NA	66	NA	NA	NA	Poly(A+)	PROSTATE	Bilateral	NA	Apex|Base	NA	NA	NA	NA	NA	NA	NA	not_fused	not_fused	not_fused
	150	TCGA	TCGA-EJ-7330-11	TCGA-EJ-7330-11	NORMAL	WHITE	NA	68	NA	NA	NA	Poly(A+)	PROSTATE	Bilateral	NA	Apex|Middle|Base	NA	NA	NA	NA	NA	NA	NA	not_fused	not_fused	not_fused
	151	TCGA	TCGA-EJ-7792-11	TCGA-EJ-7792-11	NORMAL	WHITE	NA	53	NA	NA	NA	Poly(A+)	PROSTATE	Bilateral	NA	Apex|Middle	NA	NA	NA	NA	NA	NA	NA	not_fused	not_fused	not_fused
	152	TCGA	TCGA-HC-7745-11	TCGA-HC-7745-11	NORMAL	WHITE	NA	65	NA	NA	NA	Poly(A+)	PROSTATE	Bilateral	NA	Middle	NA	NA	NA	NA	NA	NA	NA	not_fused	not_fused	not_fused
	153	TCGA	TCGA-HC-7742-11	TCGA-HC-7742-11	NORMAL	WHITE	NA	58	NA	NA	NA	Poly(A+)	PROSTATE	NA	NA	NA	NA	NA	NA	NA	NA	NA	NA	not_fused	not_fused	not_fused
	154	TCGA	TCGA-EJ-7115-11	TCGA-EJ-7115-11	NORMAL	WHITE	NA	65	NA	NA	NA	Poly(A+)	PROSTATE	Bilateral	NA	NA	NA	NA	NA	NA	NA	NA	NA	not_fused	not_fused	not_fused
	155	TCGA	TCGA-EJ-7784-11	TCGA-EJ-7784-11	NORMAL	WHITE	NA	63	NA	NA	NA	Poly(A+)	PROSTATE	Bilateral	NA	NA	NA	NA	NA	NA	NA	NA	NA	not_fused	not_fused	not_fused
	156	TCGA	TCGA-EJ-7317-11	TCGA-EJ-7317-11	NORMAL	WHITE	NA	71	NA	NA	NA	Poly(A+)	PROSTATE	Bilateral	NA	Apex|Middle	NA	NA	NA	NA	NA	NA	NA	not_fused	not_fused	not_fused
	157	TCGA	TCGA-HC-7738-11	TCGA-HC-7738-11	NORMAL	WHITE	NA	58	NA	NA	NA	Poly(A+)	PROSTATE	Bilateral	NA	Apex	NA	NA	NA	NA	NA	NA	NA	not_fused	not_fused	not_fused
	158	TCGA	TCGA-HC-8260-11	TCGA-HC-8260-11	NORMAL	BLACK	NA	43	NA	NA	NA	Poly(A+)	PROSTATE	Bilateral	Peripheral Zone	Apex	NA	NA	NA	NA	NA	NA	NA	not_fused	not_fused	not_fused
	159	TCGA	TCGA-HC-8259-11	TCGA-HC-8259-11	NORMAL	BLACK	NA	50	NA	NA	NA	Poly(A+)	PROSTATE	Left	NA	NA	NA	NA	NA	NA	NA	NA	NA	not_fused	not_fused	not_fused
	160	TCGA	TCGA-HC-8258-11	TCGA-HC-8258-11	NORMAL	BLACK	NA	56	NA	NA	NA	Poly(A+)	PROSTATE	Bilateral	NA	NA	NA	NA	NA	NA	NA	NA	NA	not_fused	not_fused	not_fused
	161	TCGA	TCGA-HC-8262-11	TCGA-HC-8262-11	NORMAL	WHITE	NA	57	NA	NA	NA	Poly(A+)	PROSTATE	Bilateral	NA	NA	NA	NA	NA	NA	NA	NA	NA	not_fused	not_fused	not_fused
	162	TCGA	TCGA-EJ-7797-11	TCGA-EJ-7797-11	NORMAL	WHITE	NA	53	NA	NA	NA	Poly(A+)	PROSTATE	Bilateral	NA	NA	NA	NA	NA	NA	NA	NA	NA	not_fused	not_fused	not_fused
	163	TCGA	TCGA-EJ-7793-11	TCGA-EJ-7793-11	NORMAL	WHITE	NA	49	NA	NA	NA	Poly(A+)	PROSTATE	Bilateral	NA	Apex|Middle	NA	NA	NA	NA	NA	NA	NA	not_fused	not_fused	not_fused
	164	TCGA	TCGA-EJ-7321-11	TCGA-EJ-7321-11	NORMAL	BLACK	NA	57	NA	NA	NA	Poly(A+)	PROSTATE	Bilateral	NA	NA	NA	NA	NA	NA	NA	NA	NA	not_fused	not_fused	not_fused
	165	TCGA	TCGA-CH-5769-11	TCGA-CH-5769-11	NORMAL	WHITE	NA	48	NA	NA	NA	Poly(A+)	PROSTATE	Bilateral	NA	NA	NA	NA	NA	NA	NA	NA	NA	not_fused	not_fused	not_fused
	166	TCGA	TCGA-CH-5761-11	TCGA-CH-5761-11	NORMAL	WHITE	NA	61	NA	NA	NA	Poly(A+)	PROSTATE	Left	Peripheral Zone	NA	NA	NA	NA	NA	NA	NA	NA	not_fused	not_fused	not_fused
	167	TCGA	TCGA-EJ-7331-11	TCGA-EJ-7331-11	NORMAL	WHITE	NA	64	NA	NA	NA	Poly(A+)	PROSTATE	Bilateral	NA	Apex|Middle	NA	NA	NA	NA	NA	NA	NA	not_fused	not_fused	not_fused
	168	TCGA	TCGA-G9-6499-11	TCGA-G9-6499-11	NORMAL	WHITE	NA	66	NA	NA	NA	Poly(A+)	PROSTATE	Bilateral	NA	Apex|Base	NA	NA	NA	NA	NA	NA	NA	not_fused	not_fused	not_fused
	169	TCGA	TCGA-G9-6342-11	TCGA-G9-6342-11	NORMAL	WHITE	NA	61	NA	NA	NA	Poly(A+)	PROSTATE	Bilateral	NA	Apex|Base	NA	NA	NA	NA	NA	NA	NA	not_fused	not_fused	not_fused
	170	TCGA	TCGA-G9-6351-11	TCGA-G9-6351-11	NORMAL	WHITE	NA	51	NA	NA	NA	Poly(A+)	PROSTATE	Bilateral	NA	Apex	NA	NA	NA	NA	NA	NA	NA	not_fused	not_fused	fused
	171	TCGA	TCGA-G9-6363-11	TCGA-G9-6363-11	NORMAL	WHITE	NA	64	NA	NA	NA	Poly(A+)	PROSTATE	Bilateral	NA	Base	NA	NA	NA	NA	NA	NA	NA	not_fused	not_fused	not_fused
	172	TCGA	TCGA-G9-6362-11	TCGA-G9-6362-11	NORMAL	WHITE	NA	57	NA	NA	NA	Poly(A+)	PROSTATE	Bilateral	NA	Apex|Base	NA	NA	NA	NA	NA	NA	NA	not_fused	not_fused	not_fused
	173	TCGA	TCGA-EJ-A8FO-11	TCGA-EJ-A8FO-11	NORMAL	NA	NA	51	NA	NA	NA	Poly(A+)	PROSTATE	Bilateral	NA	NA	NA	NA	NA	NA	NA	NA	NA	not_fused	not_fused	not_fused
	174	TCGA	TCGA-J4-A83J-11	TCGA-J4-A83J-11	NORMAL	WHITE	NA	68	NA	NA	NA	Poly(A+)	PROSTATE	Bilateral	Peripheral Zone	Apex|Middle|Base	NA	NA	NA	NA	NA	NA	NA	not_fused	not_fused	not_fused
	175	TCGA	TCGA-G9-6378-01	TCGA-G9-6378-01	PRIMARY	BLACK	NA	54	4.2	7	7	Poly(A+)	PROSTATE	Bilateral	NA	Apex|Base	NA	NA	T2c	T1c	NO	NA	not_fused	not_fused	not_fused	not_fused
	176	TCGA	TCGA-CH-5767-01	TCGA-CH-5767-01	PRIMARY	WHITE	NA	66	11.6	7	7	Poly(A+)	PROSTATE	Bilateral	Peripheral Zone	NA	NEGATIVE	N0	T2c	NA	NO	NA	not_fused	not_fused	not_fused	not_fused
	177	TCGA	TCGA-G9-6332-01	TCGA-G9-6332-01	PRIMARY	WHITE	NA	55	NA	7	7	Poly(A+)	PROSTATE	Bilateral	NA	Apex|Base	NEGATIVE	N0	T3a	T2b	NO	NA	fused	not_fused	not_fused	not_fused
	178	TCGA	TCGA-G9-6336-01	TCGA-G9-6336-01	PRIMARY	WHITE	NA	57	10.6	7	7	Poly(A+)	PROSTATE	Bilateral	NA	Apex|Base	NEGATIVE	N0	NA	T2c	NO	NA	fused	fused	not_fused	not_fused
	179	TCGA	TCGA-G9-6348-01	TCGA-G9-6348-01	PRIMARY	WHITE	NA	68	4.6	7	7	Poly(A+)	PROSTATE	Bilateral	NA	Apex|Base	NEGATIVE	N0	T2c	T3a	NO	NA	not_fused	not_fused	not_fused	not_fused
	180	TCGA	TCGA-G9-6356-01	TCGA-G9-6356-01	PRIMARY	WHITE	NA	60	8.7	9	9	Poly(A+)	PROSTATE	Bilateral	NA	Apex|Base	NEGATIVE	N0	T3b	T1c	NO	NA	fused	not_fused	not_fused	fused
	181	TCGA	TCGA-G9-6362-01	TCGA-G9-6362-01	PRIMARY	WHITE	NA	57	NA	7	7	Poly(A+)	PROSTATE	Bilateral	NA	Apex|Base	NEGATIVE	N0	T3a	T1c	NO	NA	fused	not_fused	not_fused	not_fused
	182	TCGA	TCGA-G9-6363-01	TCGA-G9-6363-01	PRIMARY	WHITE	NA	64	4.6	7	7	Poly(A+)	PROSTATE	Bilateral	NA	Base	NEGATIVE	N0	T4	T2b	NO	NA	fused	not_fused	not_fused	not_fused
	183	TCGA	TCGA-CH-5766-01	TCGA-CH-5766-01	PRIMARY	WHITE	NA	55	13.9	7	7	Poly(A+)	PROSTATE	Bilateral	Peripheral Zone	NA	POSITIVE	N1	T3a	NA	NO	NA	not_fused	not_fused	not_fused	not_fused
	184	TCGA	TCGA-CH-5768-01	TCGA-CH-5768-01	PRIMARY	WHITE	NA	72	12.8	6	6	Poly(A+)	PROSTATE	Bilateral	Overlapping	NA	NEGATIVE	N0	T3a	NA	NO	NA	fused	not_fused	not_fused	not_fused
	185	TCGA	TCGA-EJ-5504-01	TCGA-EJ-5504-01	PRIMARY	WHITE	NA	65	8.6	7	7	Poly(A+)	PROSTATE	Bilateral	Overlapping	Apex|Middle|Base	POSITIVE	N1	T3a	T2c	YES	77	not_fused	not_fused	not_fused	not_fused
	186	TCGA	TCGA-EJ-5505-01	TCGA-EJ-5505-01	PRIMARY	WHITE	NA	57	4	7	7	Poly(A+)	PROSTATE	Bilateral	NA	Apex|Middle|Base	NEGATIVE	N0	T2c	T1c	NO	NA	not_fused	not_fused	not_fused	not_fused
	187	TCGA	TCGA-EJ-5506-01	TCGA-EJ-5506-01	PRIMARY	WHITE	NA	67	7.2	8	8	Poly(A+)	PROSTATE	Bilateral	NA	Apex|Middle|Base	POSITIVE	N1	T3b	T3b	NO	NA	fused	not_fused	not_fused	not_fused
	188	TCGA	TCGA-EJ-5542-01	TCGA-EJ-5542-01	PRIMARY	WHITE	NA	60	19.3	7	7	Poly(A+)	PROSTATE	Bilateral	NA	Apex|Middle|Base	NEGATIVE	N0	T3a	T2b	NO	NA	fused	not_fused	not_fused	not_fused
	189	TCGA	TCGA-G9-6364-01	TCGA-G9-6364-01	PRIMARY	WHITE	NA	72	NA	7	7	Poly(A+)	PROSTATE	Bilateral	NA	NA	NEGATIVE	N0	T3a	NA	NO	NA	fused	not_fused	not_fused	not_fused
	190	TCGA	TCGA-G9-6365-01	TCGA-G9-6365-01	PRIMARY	WHITE	NA	71	11.6	7	7	Poly(A+)	PROSTATE	Bilateral	NA	Apex|Base	NEGATIVE	N0	T4	T2a	NO	NA	fused	not_fused	not_fused	not_fused
	191	TCGA	TCGA-G9-6367-01	TCGA-G9-6367-01	PRIMARY	WHITE	NA	60	8.5	9	9	Poly(A+)	PROSTATE	Bilateral	NA	Apex|Base	NEGATIVE	N0	T3a	T2b	NO	NA	not_fused	not_fused	not_fused	not_fused
	192	TCGA	TCGA-G9-6370-01	TCGA-G9-6370-01	PRIMARY	WHITE	NA	52	6.4	7	7	Poly(A+)	PROSTATE	Bilateral	NA	Apex|Base	NEGATIVE	N0	T3b	T1c	NO	NA	not_fused	not_fused	not_fused	not_fused
	193	TCGA	TCGA-G9-6371-01	TCGA-G9-6371-01	PRIMARY	WHITE	NA	58	6.3	6	6	Poly(A+)	PROSTATE	Bilateral	NA	Apex|Base	NA	NA	T2c	T1c	NO	NA	not_fused	not_fused	not_fused	fused
	194	TCGA	TCGA-G9-6373-01	TCGA-G9-6373-01	PRIMARY	WHITE	NA	68	NA	7	7	Poly(A+)	PROSTATE	Bilateral	NA	Apex|Base	NA	NA	T3a	T2b	NO	NA	fused	not_fused	not_fused	not_fused
	195	TCGA	TCGA-G9-6384-01	TCGA-G9-6384-01	PRIMARY	WHITE	NA	53	7.4	7	7	Poly(A+)	PROSTATE	Bilateral	NA	Apex|Base	NEGATIVE	N0	T3a	T1c	NO	NA	fused	not_fused	not_fused	not_fused
	196	TCGA	TCGA-CH-5746-01	TCGA-CH-5746-01	PRIMARY	WHITE	NA	57	6.6	7	7	Poly(A+)	PROSTATE	Bilateral	NA	NA	NEGATIVE	N0	T2c	NA	NO	NA	fused	not_fused	not_fused	not_fused
	197	TCGA	TCGA-CH-5738-01	TCGA-CH-5738-01	PRIMARY	WHITE	NA	72	10	6	6	Poly(A+)	PROSTATE	Bilateral	NA	NA	NA	NA	NA	NA	NO	NA	not_fused	not_fused	not_fused	not_fused
	198	TCGA	TCGA-CH-5752-01	TCGA-CH-5752-01	PRIMARY	WHITE	NA	66	9.8	8	8	Poly(A+)	PROSTATE	Bilateral	Overlapping	NA	NEGATIVE	N0	T3a	NA	NO	NA	fused	not_fused	not_fused	not_fused
	199	TCGA	TCGA-EJ-5495-01	TCGA-EJ-5495-01	PRIMARY	WHITE	NA	68	10.8	8	8	Poly(A+)	PROSTATE	Bilateral	NA	Middle|Base	POSITIVE	N1	T3b	T1c	NO	NA	fused	not_fused	not_fused	not_fused
	200	TCGA	TCGA-CH-5743-01	TCGA-CH-5743-01	PRIMARY	WHITE	NA	66	2.2	7	7	Poly(A+)	PROSTATE	Bilateral	Peripheral Zone	NA	NEGATIVE	N0	T2c	NA	NO	NA	fused	not_fused	not_fused	not_fused
	201	TCGA	TCGA-EJ-5514-01	TCGA-EJ-5514-01	PRIMARY	WHITE	NA	66	7.4	9	9	Poly(A+)	PROSTATE	Bilateral	NA	NA	NEGATIVE	N0	T2c	T1c	NO	NA	not_fused	not_fused	not_fused	not_fused
	202	TCGA	TCGA-CH-5753-01	TCGA-CH-5753-01	PRIMARY	WHITE	NA	70	4.5	9	9	Poly(A+)	PROSTATE	Bilateral	Overlapping	NA	POSITIVE	N1	T3b	NA	NO	NA	not_fused	not_fused	not_fused	not_fused
	203	TCGA	TCGA-CH-5762-01	TCGA-CH-5762-01	PRIMARY	WHITE	NA	60	17.2	7	7	Poly(A+)	PROSTATE	Bilateral	Peripheral Zone	NA	NEGATIVE	N0	T3b	NA	NO	NA	not_fused	not_fused	not_fused	fused
	204	TCGA	TCGA-CH-5763-01	TCGA-CH-5763-01	PRIMARY	WHITE	NA	66	14.8	7	7	Poly(A+)	PROSTATE	Bilateral	Peripheral Zone	NA	NEGATIVE	N0	T3a	NA	NO	NA	not_fused	not_fused	not_fused	fused
	205	TCGA	TCGA-CH-5764-01	TCGA-CH-5764-01	PRIMARY	WHITE	NA	66	14	7	7	Poly(A+)	PROSTATE	Bilateral	Peripheral Zone	NA	NEGATIVE	N0	T3b	NA	NO	NA	fused	not_fused	not_fused	not_fused
	206	TCGA	TCGA-EJ-5496-01	TCGA-EJ-5496-01	PRIMARY	WHITE	NA	59	6.5	7	7	Poly(A+)	PROSTATE	Bilateral	Overlapping	Apex|Middle|Base	NEGATIVE	N0	T2c	T1c	NO	NA	fused	not_fused	not_fused	not_fused
	207	TCGA	TCGA-EJ-5497-01	TCGA-EJ-5497-01	PRIMARY	WHITE	NA	47	7.2	7	7	Poly(A+)	PROSTATE	Bilateral	Overlapping	Middle	NEGATIVE	N0	T2c	T2c	NO	NA	fused	not_fused	not_fused	not_fused
	208	TCGA	TCGA-EJ-5498-01	TCGA-EJ-5498-01	PRIMARY	WHITE	NA	56	5	7	7	Poly(A+)	PROSTATE	Bilateral	Overlapping	Middle	NEGATIVE	N0	T2c	T2c	NO	NA	fused	not_fused	not_fused	not_fused
	209	TCGA	TCGA-EJ-5515-01	TCGA-EJ-5515-01	PRIMARY	WHITE	NA	60	4.8	7	7	Poly(A+)	PROSTATE	Right	NA	Apex|Middle|Base	NEGATIVE	N0	T3a	T1c	NO	NA	not_fused	not_fused	not_fused	not_fused
	210	TCGA	TCGA-EJ-5516-01	TCGA-EJ-5516-01	PRIMARY	WHITE	NA	49	10.9	7	7	Poly(A+)	PROSTATE	Bilateral	NA	NA	NEGATIVE	N0	T3a	T2b	NO	NA	fused	not_fused	not_fused	not_fused
	211	TCGA	TCGA-CH-5737-01	TCGA-CH-5737-01	PRIMARY	WHITE	NA	73	14.7	7	7	Poly(A+)	PROSTATE	Bilateral	Peripheral Zone	NA	NEGATIVE	N0	T2c	NA	NO	NA	not_fused	not_fused	not_fused	not_fused
	212	TCGA	TCGA-G9-6385-01	TCGA-G9-6385-01	PRIMARY	WHITE	NA	66	7.4	7	7	Poly(A+)	PROSTATE	Bilateral	NA	Base	NA	NA	T2c	T1c	NO	NA	fused	not_fused	not_fused	not_fused
	213	TCGA	TCGA-G9-6494-01	TCGA-G9-6494-01	PRIMARY	WHITE	NA	66	87	7	7	Poly(A+)	PROSTATE	Bilateral	NA	Base	NEGATIVE	N0	T4	T1c	NO	NA	not_fused	not_fused	not_fused	not_fused
	214	TCGA	TCGA-G9-6496-01	TCGA-G9-6496-01	PRIMARY	WHITE	NA	61	NA	7	7	Poly(A+)	PROSTATE	Bilateral	NA	Apex|Base	NEGATIVE	N0	T2c	T1c	NO	NA	not_fused	not_fused	not_fused	not_fused
	215	TCGA	TCGA-CH-5748-01	TCGA-CH-5748-01	PRIMARY	WHITE	NA	64	1.6	7	7	Poly(A+)	PROSTATE	Bilateral	NA	NA	NEGATIVE	N0	T3a	NA	NO	NA	not_fused	not_fused	not_fused	not_fused
	216	TCGA	TCGA-CH-5769-01	TCGA-CH-5769-01	PRIMARY	WHITE	NA	48	NA	9	9	Poly(A+)	PROSTATE	Bilateral	NA	NA	NEGATIVE	N0	T3b	NA	NO	NA	fused	not_fused	not_fused	not_fused
	217	TCGA	TCGA-CH-5739-01	TCGA-CH-5739-01	PRIMARY	WHITE	NA	65	4.8	7	7	Poly(A+)	PROSTATE	Left	Peripheral Zone	NA	NEGATIVE	N0	T3a	NA	NO	NA	fused	not_fused	not_fused	not_fused
	218	TCGA	TCGA-EJ-5507-01	TCGA-EJ-5507-01	PRIMARY	WHITE	NA	54	8.9	9	9	Poly(A+)	PROSTATE	Bilateral	NA	Apex|Middle|Base	POSITIVE	N1	T3b	T2c	NO	NA	fused	not_fused	not_fused	not_fused
	219	TCGA	TCGA-CH-5750-01	TCGA-CH-5750-01	PRIMARY	WHITE	NA	72	13.2	7	7	Poly(A+)	PROSTATE	Bilateral	Peripheral Zone	NA	NEGATIVE	N0	T2c	NA	NO	NA	not_fused	not_fused	not_fused	not_fused
	220	TCGA	TCGA-CH-5751-01	TCGA-CH-5751-01	PRIMARY	WHITE	NA	68	22.6	10	10	Poly(A+)	PROSTATE	Bilateral	Overlapping	NA	POSITIVE	N1	T4	NA	NO	NA	not_fused	not_fused	not_fused	not_fused
	221	TCGA	TCGA-CH-5772-01	TCGA-CH-5772-01	PRIMARY	WHITE	NA	63	24.6	9	9	Poly(A+)	PROSTATE	Bilateral	NA	NA	NEGATIVE	N0	T3a	NA	NO	NA	not_fused	not_fused	not_fused	not_fused
	222	TCGA	TCGA-CH-5788-01	TCGA-CH-5788-01	PRIMARY	WHITE	NA	69	19.4	7	7	Poly(A+)	PROSTATE	Bilateral	NA	Base	POSITIVE	N1	T3b	NA	YES	786	not_fused	not_fused	not_fused	not_fused
	223	TCGA	TCGA-CH-5789-01	TCGA-CH-5789-01	PRIMARY	WHITE	NA	61	5.7	7	7	Poly(A+)	PROSTATE	Bilateral	Peripheral Zone	NA	NEGATIVE	N0	T3a	NA	NO	NA	fused	not_fused	not_fused	not_fused
	224	TCGA	TCGA-CH-5790-01	TCGA-CH-5790-01	PRIMARY	WHITE	NA	64	5.2	7	7	Poly(A+)	PROSTATE	Bilateral	NA	NA	NEGATIVE	N0	T2c	NA	NO	NA	fused	not_fused	not_fused	not_fused
	225	TCGA	TCGA-CH-5791-01	TCGA-CH-5791-01	PRIMARY	WHITE	NA	72	10.1	7	7	Poly(A+)	PROSTATE	Bilateral	Peripheral Zone	NA	NEGATIVE	N0	T3a	NA	NO	NA	fused	not_fused	not_fused	not_fused
	226	TCGA	TCGA-CH-5740-01	TCGA-CH-5740-01	PRIMARY	WHITE	NA	57	NA	7	7	Poly(A+)	PROSTATE	Bilateral	NA	NA	NEGATIVE	N0	T2c	NA	NO	NA	fused	not_fused	not_fused	not_fused
	227	TCGA	TCGA-CH-5741-01	TCGA-CH-5741-01	PRIMARY	WHITE	NA	56	28	9	9	Poly(A+)	PROSTATE	Bilateral	Overlapping	NA	POSITIVE	N1	T3b	NA	NO	NA	fused	not_fused	not_fused	not_fused
	228	TCGA	TCGA-EJ-5508-01	TCGA-EJ-5508-01	PRIMARY	WHITE	NA	65	7.4	7	7	Poly(A+)	PROSTATE	Bilateral	NA	Middle|Base	NEGATIVE	N0	T3a	T1c	NO	NA	fused	not_fused	not_fused	not_fused
	229	TCGA	TCGA-EJ-5512-01	TCGA-EJ-5512-01	PRIMARY	WHITE	NA	46	6.1	7	7	Poly(A+)	PROSTATE	Bilateral	NA	Apex|Middle|Base	NEGATIVE	N0	T2c	T1c	NO	NA	fused	not_fused	not_fused	not_fused
	230	TCGA	TCGA-EJ-7781-01	TCGA-EJ-7781-01	PRIMARY	WHITE	NA	65	3.5	7	7	Poly(A+)	PROSTATE	Bilateral	NA	NA	NEGATIVE	N0	T2c	T1c	NO	NA	not_fused	not_fused	not_fused	not_fused
	231	TCGA	TCGA-EJ-7782-01	TCGA-EJ-7782-01	PRIMARY	BLACK	NA	71	NA	8	8	Poly(A+)	PROSTATE	Bilateral	NA	NA	NEGATIVE	N0	T2c	T2c	NO	NA	not_fused	not_fused	not_fused	not_fused
	232	TCGA	TCGA-HC-7212-01	TCGA-HC-7212-01	PRIMARY	WHITE	NA	56	8	7	7	Poly(A+)	PROSTATE	Right	NA	NA	NEGATIVE	N0	T2a	NA	NO	NA	fused	not_fused	not_fused	not_fused
	233	TCGA	TCGA-EJ-7315-01	TCGA-EJ-7315-01	PRIMARY	WHITE	NA	68	5.8	7	7	Poly(A+)	PROSTATE	Bilateral	NA	Apex|Middle|Base	NEGATIVE	N0	T3a	T2a	NO	NA	fused	not_fused	not_fused	not_fused
	234	TCGA	TCGA-EJ-7792-01	TCGA-EJ-7792-01	PRIMARY	WHITE	NA	53	4.6	7	7	Poly(A+)	PROSTATE	Bilateral	NA	Apex|Middle	NEGATIVE	N0	T2c	T1c	NO	NA	not_fused	not_fused	not_fused	not_fused
	235	TCGA	TCGA-EJ-7314-01	TCGA-EJ-7314-01	PRIMARY	WHITE	NA	62	6.1	7	7	Poly(A+)	PROSTATE	Bilateral	NA	Apex|Middle|Base	NEGATIVE	N0	T3b	T2c	NO	NA	fused	not_fused	not_fused	not_fused
	236	TCGA	TCGA-EJ-7783-01	TCGA-EJ-7783-01	PRIMARY	WHITE	NA	70	12.8	7	7	Poly(A+)	PROSTATE	Bilateral	NA	NA	NEGATIVE	N0	T3a	T2c	YES	81	fused	not_fused	not_fused	not_fused
	237	TCGA	TCGA-HC-7211-01	TCGA-HC-7211-01	PRIMARY	WHITE	NA	62	10.9	7	7	Poly(A+)	PROSTATE	Bilateral	NA	Apex|Middle|Base	NEGATIVE	N0	T2c	T2a	NO	NA	fused	not_fused	not_fused	not_fused
	238	TCGA	TCGA-EJ-7115-01	TCGA-EJ-7115-01	PRIMARY	WHITE	NA	65	3.6	7	7	Poly(A+)	PROSTATE	Bilateral	NA	NA	NEGATIVE	N0	T3a	T1c	NO	NA	not_fused	not_fused	not_fused	not_fused
	239	TCGA	TCGA-HC-7213-01	TCGA-HC-7213-01	PRIMARY	WHITE	NA	53	13.5	9	9	Poly(A+)	PROSTATE	Bilateral	NA	Apex|Middle|Base	NEGATIVE	N0	T3b	T3b	YES	170	fused	not_fused	not_fused	not_fused
	240	TCGA	TCGA-EJ-7785-01	TCGA-EJ-7785-01	PRIMARY	WHITE	NA	54	4.3	7	7	Poly(A+)	PROSTATE	Bilateral	NA	Middle|Base	NEGATIVE	N0	T3a	T2b	NO	NA	fused	not_fused	not_fused	not_fused
	241	TCGA	TCGA-HC-7749-01	TCGA-HC-7749-01	PRIMARY	WHITE	NA	70	4.2	7	7	Poly(A+)	PROSTATE	Right	NA	Middle|Base	NEGATIVE	N0	T3a	NA	NO	NA	not_fused	not_fused	not_fused	not_fused
	242	TCGA	TCGA-HC-7736-01	TCGA-HC-7736-01	PRIMARY	WHITE	NA	59	5	7	7	Poly(A+)	PROSTATE	Bilateral	NA	Middle|Base	NEGATIVE	N0	T2c	T2b	NO	NA	not_fused	not_fused	not_fused	not_fused
	243	TCGA	TCGA-EJ-7791-01	TCGA-EJ-7791-01	PRIMARY	WHITE	NA	67	4.5	7	7	Poly(A+)	PROSTATE	Bilateral	NA	Apex|Middle	NEGATIVE	N0	T2c	T1c	NO	NA	not_fused	not_fused	not_fused	not_fused
	244	TCGA	TCGA-G9-6366-01	TCGA-G9-6366-01	PRIMARY	WHITE	NA	61	7.6	7	7	Poly(A+)	PROSTATE	Left	NA	Apex|Base	NA	NA	T3b	T1c	NO	NA	not_fused	not_fused	not_fused	not_fused
	245	TCGA	TCGA-HC-7748-01	TCGA-HC-7748-01	PRIMARY	WHITE	NA	60	7.5	6	6	Poly(A+)	PROSTATE	Right	NA	NA	NEGATIVE	N0	T2a	NA	NO	NA	fused	not_fused	not_fused	not_fused
	246	TCGA	TCGA-EJ-7327-01	TCGA-EJ-7327-01	PRIMARY	WHITE	NA	61	12.2	7	7	Poly(A+)	PROSTATE	Bilateral	NA	Apex|Middle|Base	NEGATIVE	N0	T3b	T2a	NO	NA	fused	not_fused	not_fused	not_fused
	247	TCGA	TCGA-HC-7738-01	TCGA-HC-7738-01	PRIMARY	WHITE	NA	58	NA	7	7	Poly(A+)	PROSTATE	Bilateral	NA	Apex	NA	NA	T2c	NA	NO	NA	not_fused	not_fused	not_fused	not_fused
	248	TCGA	TCGA-G9-6353-01	TCGA-G9-6353-01	PRIMARY	WHITE	NA	58	4.6	7	7	Poly(A+)	PROSTATE	Bilateral	Peripheral Zone	Apex|Middle	NA	NA	T3a	T1c	NO	NA	fused	not_fused	not_fused	not_fused
	249	TCGA	TCGA-G9-6329-01	TCGA-G9-6329-01	PRIMARY	WHITE	NA	67	6.5	7	7	Poly(A+)	PROSTATE	Bilateral	NA	NA	NA	NA	T2c	T1c	NO	NA	fused	not_fused	not_fused	not_fused
	250	TCGA	TCGA-HC-7080-01	TCGA-HC-7080-01	PRIMARY	WHITE	NA	66	4.1	7	7	Poly(A+)	PROSTATE	Right	NA	Apex|Middle	NEGATIVE	N0	T2a	T2a	NO	NA	not_fused	not_fused	not_fused	not_fused
	251	TCGA	TCGA-CH-5765-01	TCGA-CH-5765-01	PRIMARY	WHITE	NA	55	37.9	7	7	Poly(A+)	PROSTATE	Bilateral	NA	NA	NEGATIVE	N0	T3a	NA	NO	NA	fused	not_fused	not_fused	not_fused
	252	TCGA	TCGA-EJ-5499-01	TCGA-EJ-5499-01	PRIMARY	ASIAN	NA	61	5.2	7	7	Poly(A+)	PROSTATE	Bilateral	Overlapping	Apex|Middle|Base	NEGATIVE	N0	T3a	T2b	NO	NA	fused	not_fused	not_fused	not_fused
	253	TCGA	TCGA-EJ-5517-01	TCGA-EJ-5517-01	PRIMARY	WHITE	NA	55	9.6	6	6	Poly(A+)	PROSTATE	Bilateral	NA	NA	NEGATIVE	N0	T2c	T1c	NO	NA	not_fused	not_fused	not_fused	not_fused
	254	TCGA	TCGA-EJ-5522-01	TCGA-EJ-5522-01	PRIMARY	WHITE	NA	51	5.6	7	7	Poly(A+)	PROSTATE	Bilateral	Overlapping	Apex|Middle|Base	NEGATIVE	N0	T2c	T2a	NO	NA	fused	not_fused	not_fused	not_fused
	255	TCGA	TCGA-EJ-5524-01	TCGA-EJ-5524-01	PRIMARY	WHITE	NA	57	3.8	9	9	Poly(A+)	PROSTATE	Bilateral	NA	Base	NEGATIVE	N0	T3a	T2b	NO	NA	fused	not_fused	not_fused	not_fused
	256	TCGA	TCGA-EJ-5525-01	TCGA-EJ-5525-01	PRIMARY	WHITE	NA	67	4	9	9	Poly(A+)	PROSTATE	Bilateral	NA	Apex|Base	NEGATIVE	N0	T2c	T3a	YES	338	fused	not_fused	not_fused	not_fused
	257	TCGA	TCGA-EJ-5526-01	TCGA-EJ-5526-01	PRIMARY	WHITE	NA	56	28.6	8	8	Poly(A+)	PROSTATE	Bilateral	NA	Middle|Base	POSITIVE	N1	T3a	T1c	NO	NA	fused	not_fused	not_fused	not_fused
	258	TCGA	TCGA-EJ-5527-01	TCGA-EJ-5527-01	PRIMARY	WHITE	NA	69	7.7	7	7	Poly(A+)	PROSTATE	Bilateral	NA	Apex|Middle	NEGATIVE	N0	T3a	T2a	NO	NA	fused	not_fused	not_fused	not_fused
	259	TCGA	TCGA-HC-7078-01	TCGA-HC-7078-01	PRIMARY	WHITE	NA	69	25	7	7	Poly(A+)	PROSTATE	Bilateral	NA	NA	NEGATIVE	N0	T3a	T1c	NO	NA	not_fused	not_fused	not_fused	not_fused
	260	TCGA	TCGA-EJ-7328-01	TCGA-EJ-7328-01	PRIMARY	WHITE	NA	70	6.5	7	7	Poly(A+)	PROSTATE	Bilateral	NA	Middle|Base	NEGATIVE	N0	T3a	T1c	NO	NA	fused	not_fused	not_fused	not_fused
	261	TCGA	TCGA-EJ-7786-01	TCGA-EJ-7786-01	PRIMARY	WHITE	NA	62	4.5	7	7	Poly(A+)	PROSTATE	Bilateral	NA	NA	NEGATIVE	N0	T2c	T1c	NO	NA	not_fused	not_fused	not_fused	not_fused
	262	TCGA	TCGA-EJ-7330-01	TCGA-EJ-7330-01	PRIMARY	WHITE	NA	68	6.2	7	7	Poly(A+)	PROSTATE	Bilateral	NA	Apex|Middle|Base	NEGATIVE	N0	T3a	T1c	NO	NA	not_fused	not_fused	not_fused	not_fused
	263	TCGA	TCGA-H9-7775-01	TCGA-H9-7775-01	PRIMARY	WHITE	NA	68	7.2	7	7	Poly(A+)	PROSTATE	Right	NA	NA	NA	NA	T2c	NA	NO	NA	not_fused	not_fused	not_fused	not_fused
	264	TCGA	TCGA-G9-6377-01	TCGA-G9-6377-01	PRIMARY	WHITE	NA	61	3.6	7	7	Poly(A+)	PROSTATE	Bilateral	NA	Apex|Base	NEGATIVE	N0	T2c	T2b	NO	NA	fused	not_fused	not_fused	not_fused
	265	TCGA	TCGA-HC-7744-01	TCGA-HC-7744-01	PRIMARY	WHITE	NA	46	4.4	7	7	Poly(A+)	PROSTATE	Bilateral	NA	Apex|Middle|Base	NEGATIVE	N0	T3b	NA	NO	NA	fused	not_fused	not_fused	not_fused
	266	TCGA	TCGA-HC-7232-01	TCGA-HC-7232-01	PRIMARY	WHITE	NA	66	9.6	9	9	Poly(A+)	PROSTATE	Bilateral	NA	NA	NA	NA	T3b	NA	NO	NA	fused	not_fused	not_fused	not_fused
	267	TCGA	TCGA-HC-7819-01	TCGA-HC-7819-01	PRIMARY	WHITE	NA	53	NA	8	8	Poly(A+)	PROSTATE	Bilateral	Central Zone	NA	NEGATIVE	N0	T2c	T2c	NO	NA	fused	not_fused	not_fused	not_fused
	268	TCGA	TCGA-EJ-7788-01	TCGA-EJ-7788-01	PRIMARY	WHITE	NA	53	26.6	7	7	Poly(A+)	PROSTATE	Bilateral	NA	Middle|Base	NEGATIVE	N0	T3b	T3b	NO	NA	not_fused	not_fused	not_fused	not_fused
	269	TCGA	TCGA-HC-7231-01	TCGA-HC-7231-01	PRIMARY	WHITE	NA	66	3.7	7	7	Poly(A+)	PROSTATE	Bilateral	NA	NA	NA	NA	T2c	T1c	NO	NA	fused	not_fused	not_fused	not_fused
	270	TCGA	TCGA-HC-7820-01	TCGA-HC-7820-01	PRIMARY	WHITE	NA	72	5.2	7	7	Poly(A+)	PROSTATE	Bilateral	NA	NA	NA	NA	T2c	NA	NO	NA	fused	not_fused	not_fused	not_fused
	271	TCGA	TCGA-HC-7745-01	TCGA-HC-7745-01	PRIMARY	WHITE	NA	65	NA	7	7	Poly(A+)	PROSTATE	Bilateral	NA	Middle	NEGATIVE	N0	T3b	NA	NO	NA	fused	not_fused	not_fused	not_fused
	272	TCGA	TCGA-HI-7168-01	TCGA-HI-7168-01	PRIMARY	WHITE	NA	62	5.5	9	9	Poly(A+)	PROSTATE	Bilateral	NA	NA	NEGATIVE	N0	T3b	T1c	YES	308	not_fused	not_fused	not_fused	not_fused
	273	TCGA	TCGA-G9-6361-01	TCGA-G9-6361-01	PRIMARY	WHITE	NA	61	5.5	7	7	Poly(A+)	PROSTATE	Bilateral	NA	Apex|Base	NEGATIVE	N0	T3a	T2c	NO	NA	fused	not_fused	not_fused	not_fused
	274	TCGA	TCGA-HC-7081-01	TCGA-HC-7081-01	PRIMARY	WHITE	NA	62	7.7	9	9	Poly(A+)	PROSTATE	Bilateral	NA	NA	NA	NA	T3b	NA	NO	NA	fused	not_fused	not_fused	not_fused
	275	TCGA	TCGA-G9-6343-01	TCGA-G9-6343-01	PRIMARY	WHITE	NA	62	NA	7	7	Poly(A+)	PROSTATE	Bilateral	NA	Apex|Base	NA	NA	T2c	T2a	NO	NA	not_fused	not_fused	not_fused	not_fused
	276	TCGA	TCGA-EJ-7123-01	TCGA-EJ-7123-01	PRIMARY	WHITE	NA	59	5.6	7	7	Poly(A+)	PROSTATE	Bilateral	NA	Apex|Middle|Base	NEGATIVE	N0	T2c	T1c	NO	NA	not_fused	not_fused	not_fused	not_fused
	277	TCGA	TCGA-G9-6338-01	TCGA-G9-6338-01	PRIMARY	WHITE	NA	61	NA	7	7	Poly(A+)	PROSTATE	Bilateral	NA	Apex	NEGATIVE	N0	T3a	T1c	NO	NA	not_fused	not_fused	not_fused	not_fused
	278	TCGA	TCGA-HC-7750-01	TCGA-HC-7750-01	PRIMARY	WHITE	NA	50	3.7	7	7	Poly(A+)	PROSTATE	Left	NA	Apex|Middle|Base	NA	NA	T2c	T2b	NO	NA	not_fused	not_fused	not_fused	not_fused
	279	TCGA	TCGA-HC-7230-01	TCGA-HC-7230-01	PRIMARY	WHITE	NA	50	3	7	7	Poly(A+)	PROSTATE	NA	NA	NA	NEGATIVE	N0	T2c	NA	NO	NA	fused	not_fused	not_fused	not_fused
	280	TCGA	TCGA-HC-7752-01	TCGA-HC-7752-01	PRIMARY	WHITE	NA	61	NA	7	7	Poly(A+)	PROSTATE	Bilateral	NA	Base	NEGATIVE	N0	T2c	NA	NO	NA	fused	not_fused	not_fused	not_fused
	281	TCGA	TCGA-EJ-7784-01	TCGA-EJ-7784-01	PRIMARY	WHITE	NA	63	4.1	7	7	Poly(A+)	PROSTATE	Bilateral	NA	NA	NEGATIVE	N0	T2c	T2c	NO	NA	fused	not_fused	not_fused	not_fused
	282	TCGA	TCGA-EJ-7317-01	TCGA-EJ-7317-01	PRIMARY	WHITE	NA	71	14	7	7	Poly(A+)	PROSTATE	Bilateral	NA	Apex|Middle	NEGATIVE	N0	T2c	T1c	NO	NA	not_fused	not_fused	not_fused	not_fused
	283	TCGA	TCGA-HC-7742-01	TCGA-HC-7742-01	PRIMARY	WHITE	NA	58	5.6	7	7	Poly(A+)	PROSTATE	NA	NA	NA	NEGATIVE	N0	T3a	NA	NO	NA	not_fused	not_fused	not_fused	not_fused
	284	TCGA	TCGA-HI-7171-01	TCGA-HI-7171-01	PRIMARY	WHITE	NA	56	5.6	9	9	Poly(A+)	PROSTATE	Bilateral	NA	Apex|Middle|Base	NEGATIVE	N0	T3b	T3a	YES	218	fused	not_fused	not_fused	not_fused
	285	TCGA	TCGA-HC-7740-01	TCGA-HC-7740-01	PRIMARY	WHITE	NA	59	5.9	7	7	Poly(A+)	PROSTATE	Bilateral	NA	Apex|Middle|Base	NEGATIVE	N0	T2c	T2a	NO	NA	not_fused	not_fused	not_fused	not_fused
	286	TCGA	TCGA-HI-7170-01	TCGA-HI-7170-01	PRIMARY	WHITE	NA	58	7.4	6	6	Poly(A+)	PROSTATE	Bilateral	NA	Apex	NEGATIVE	N0	T2c	T1c	NO	NA	not_fused	not_fused	not_fused	not_fused
	287	TCGA	TCGA-HC-7818-01	TCGA-HC-7818-01	PRIMARY	WHITE	NA	66	4.5	7	7	Poly(A+)	PROSTATE	Bilateral	NA	Apex|Middle|Base	NEGATIVE	N0	T2c	T2b	NO	NA	fused	not_fused	not_fused	not_fused
	288	TCGA	TCGA-FC-7708-01	TCGA-FC-7708-01	PRIMARY	ASIAN	NA	52	7.9	7	7	Poly(A+)	PROSTATE	Bilateral	Overlapping	Apex|Middle	NEGATIVE	N0	T3a	T1c	NO	NA	fused	not_fused	not_fused	not_fused
	289	TCGA	TCGA-HC-7210-01	TCGA-HC-7210-01	PRIMARY	WHITE	NA	74	8.9	7	7	Poly(A+)	PROSTATE	Right	NA	NA	NEGATIVE	N0	T2a	NA	NO	NA	not_fused	not_fused	not_fused	not_fused
	290	TCGA	TCGA-CH-5744-01	TCGA-CH-5744-01	PRIMARY	WHITE	NA	64	9.6	7	7	Poly(A+)	PROSTATE	Bilateral	Peripheral Zone	NA	NEGATIVE	N0	T2c	NA	NO	NA	fused	not_fused	not_fused	not_fused
	291	TCGA	TCGA-EJ-7794-01	TCGA-EJ-7794-01	PRIMARY	WHITE	NA	67	5.2	7	7	Poly(A+)	PROSTATE	Bilateral	NA	NA	NEGATIVE	N0	T2c	T2c	NO	NA	not_fused	not_fused	not_fused	not_fused
	292	TCGA	TCGA-HC-7075-01	TCGA-HC-7075-01	PRIMARY	WHITE	NA	63	5.1	6	6	Poly(A+)	PROSTATE	Right	NA	NA	NA	NA	T2a	T1c	NO	NA	not_fused	not_fused	not_fused	not_fused
	293	TCGA	TCGA-HI-7169-01	TCGA-HI-7169-01	PRIMARY	WHITE	NA	55	NA	7	7	Poly(A+)	PROSTATE	Bilateral	NA	Apex	NEGATIVE	N0	T3a	T2b	NO	NA	not_fused	not_fused	not_fused	not_fused
	294	TCGA	TCGA-HC-7747-01	TCGA-HC-7747-01	PRIMARY	WHITE	NA	52	3.5	7	7	Poly(A+)	PROSTATE	Bilateral	NA	Apex|Middle|Base	NEGATIVE	N0	T2c	T2b	NO	NA	fused	not_fused	not_fused	not_fused
	295	TCGA	TCGA-EJ-7789-01	TCGA-EJ-7789-01	PRIMARY	BLACK	NA	66	14.9	7	7	Poly(A+)	PROSTATE	Bilateral	NA	Base	NEGATIVE	N0	T3a	T1c	NO	NA	not_fused	not_fused	not_fused	not_fused
	296	TCGA	TCGA-HC-7821-01	TCGA-HC-7821-01	PRIMARY	WHITE	NA	54	31	8	8	Poly(A+)	PROSTATE	Bilateral	NA	Apex|Middle|Base	POSITIVE	N1	T3b	NA	NO	NA	fused	not_fused	not_fused	not_fused
	297	TCGA	TCGA-HC-7209-01	TCGA-HC-7209-01	PRIMARY	WHITE	NA	60	7.9	6	6	Poly(A+)	PROSTATE	Bilateral	NA	Apex|Middle|Base	NEGATIVE	N0	T2c	T2b	NO	NA	fused	not_fused	not_fused	not_fused
	298	TCGA	TCGA-CH-5754-01	TCGA-CH-5754-01	PRIMARY	WHITE	NA	65	37.4	9	9	Poly(A+)	PROSTATE	Bilateral	Peripheral Zone	NA	POSITIVE	N1	T3b	NA	NO	NA	fused	not_fused	not_fused	not_fused
	299	TCGA	TCGA-CH-5771-01	TCGA-CH-5771-01	PRIMARY	WHITE	NA	63	8.1	7	7	Poly(A+)	PROSTATE	Bilateral	NA	NA	NEGATIVE	N0	T2c	NA	NO	NA	not_fused	not_fused	not_fused	not_fused
	300	TCGA	TCGA-CH-5792-01	TCGA-CH-5792-01	PRIMARY	WHITE	NA	57	11.5	9	9	Poly(A+)	PROSTATE	Bilateral	NA	NA	NEGATIVE	N0	T3a	NA	NO	NA	not_fused	not_fused	not_fused	not_fused
	301	TCGA	TCGA-EJ-5509-01	TCGA-EJ-5509-01	PRIMARY	WHITE	NA	63	4.1	7	7	Poly(A+)	PROSTATE	Bilateral	NA	Apex|Middle|Base	NEGATIVE	N0	T2c	T2a	NO	NA	not_fused	not_fused	not_fused	not_fused
	302	TCGA	TCGA-EJ-5510-01	TCGA-EJ-5510-01	PRIMARY	WHITE	NA	48	15.3	7	7	Poly(A+)	PROSTATE	Bilateral	NA	NA	NEGATIVE	N0	T2c	T1c	NO	NA	not_fused	fused	not_fused	not_fused
	303	TCGA	TCGA-EJ-5511-01	TCGA-EJ-5511-01	PRIMARY	BLACK	NA	55	9.7	7	7	Poly(A+)	PROSTATE	Bilateral	NA	Apex|Middle|Base	NEGATIVE	N0	T3a	T2b	NO	NA	not_fused	not_fused	not_fused	fused
	304	TCGA	TCGA-CH-5794-01	TCGA-CH-5794-01	PRIMARY	WHITE	NA	65	6.2	7	7	Poly(A+)	PROSTATE	Bilateral	Peripheral Zone	NA	NEGATIVE	N0	T2b	NA	NO	NA	fused	not_fused	not_fused	not_fused
	305	TCGA	TCGA-EJ-5518-01	TCGA-EJ-5518-01	PRIMARY	WHITE	NA	66	36	9	9	Poly(A+)	PROSTATE	Bilateral	Overlapping	NA	NEGATIVE	N0	T4	T3b	NO	NA	not_fused	not_fused	not_fused	not_fused
	306	TCGA	TCGA-EJ-5519-01	TCGA-EJ-5519-01	PRIMARY	WHITE	NA	64	15	8	8	Poly(A+)	PROSTATE	Bilateral	Overlapping	Apex|Middle|Base	POSITIVE	N1	T3b	T2c	YES	84	not_fused	not_fused	not_fused	not_fused
	307	TCGA	TCGA-EJ-5521-01	TCGA-EJ-5521-01	PRIMARY	WHITE	NA	63	7.3	7	7	Poly(A+)	PROSTATE	Right	NA	Middle|Base	NEGATIVE	N0	T3a	T1c	NO	NA	fused	not_fused	not_fused	not_fused
	308	TCGA	TCGA-EJ-5530-01	TCGA-EJ-5530-01	PRIMARY	WHITE	NA	61	9.2	7	7	Poly(A+)	PROSTATE	Bilateral	NA	Apex|Middle	NEGATIVE	N0	T2c	T2c	NO	NA	fused	not_fused	not_fused	not_fused
	309	TCGA	TCGA-EJ-7331-01	TCGA-EJ-7331-01	PRIMARY	WHITE	NA	64	7	7	7	Poly(A+)	PROSTATE	Bilateral	NA	Apex|Middle	NEGATIVE	N0	T2c	T1c	YES	189	not_fused	not_fused	not_fused	not_fused
	310	TCGA	TCGA-EJ-5531-01	TCGA-EJ-5531-01	PRIMARY	WHITE	NA	62	NA	7	7	Poly(A+)	PROSTATE	Bilateral	NA	Apex|Middle|Base	NEGATIVE	N0	T3a	T2b	NO	NA	not_fused	not_fused	not_fused	not_fused
	311	TCGA	TCGA-EJ-5532-01	TCGA-EJ-5532-01	PRIMARY	WHITE	NA	57	11.4	7	7	Poly(A+)	PROSTATE	Bilateral	NA	Middle|Base	NEGATIVE	N0	T3a	T1c	NO	NA	not_fused	not_fused	not_fused	not_fused
	312	TCGA	TCGA-HC-7233-01	TCGA-HC-7233-01	PRIMARY	WHITE	NA	73	7.7	7	7	Poly(A+)	PROSTATE	Left	NA	Apex	NEGATIVE	N0	T2a	NA	NO	NA	not_fused	not_fused	not_fused	not_fused
	313	TCGA	TCGA-HC-7740-01	TCGA-HC-7740-01	PRIMARY	WHITE	NA	59	5.9	7	7	Poly(A+)	PROSTATE	Bilateral	NA	Apex|Middle|Base	NEGATIVE	N0	T2c	T2a	NO	NA	not_fused	not_fused	not_fused	not_fused
	314	TCGA	TCGA-HC-8258-01	TCGA-HC-8258-01	PRIMARY	BLACK	NA	56	4.3	6	6	Poly(A+)	PROSTATE	Bilateral	NA	NA	NEGATIVE	N0	T2c	NA	NO	NA	not_fused	not_fused	not_fused	not_fused
	315	TCGA	TCGA-HC-8258-01	TCGA-HC-8258-01	PRIMARY	BLACK	NA	56	4.3	6	6	Poly(A+)	PROSTATE	Bilateral	NA	NA	NEGATIVE	N0	T2c	NA	NO	NA	not_fused	not_fused	not_fused	not_fused
	316	TCGA	TCGA-HC-8265-01	TCGA-HC-8265-01	PRIMARY	WHITE	NA	66	5.2	8	8	Poly(A+)	PROSTATE	Bilateral	NA	NA	NEGATIVE	N0	T3a	NA	NO	NA	not_fused	not_fused	not_fused	not_fused
	317	TCGA	TCGA-HC-8261-01	TCGA-HC-8261-01	PRIMARY	BLACK	NA	48	14.4	7	7	Poly(A+)	PROSTATE	Bilateral	NA	NA	NA	NA	T2c	NA	NO	NA	not_fused	not_fused	not_fused	not_fused
	318	TCGA	TCGA-HC-8265-01	TCGA-HC-8265-01	PRIMARY	WHITE	NA	66	5.2	8	8	Poly(A+)	PROSTATE	Bilateral	NA	NA	NEGATIVE	N0	T3a	NA	NO	NA	not_fused	not_fused	not_fused	not_fused
	319	TCGA	TCGA-EJ-5494-01	TCGA-EJ-5494-01	PRIMARY	WHITE	NA	50	3.8	7	7	Poly(A+)	PROSTATE	Bilateral	NA	Apex|Middle	NEGATIVE	N0	T3a	T2a	NO	NA	not_fused	not_fused	not_fused	not_fused
	320	TCGA	TCGA-EJ-5501-01	TCGA-EJ-5501-01	PRIMARY	WHITE	NA	55	2.7	7	7	Poly(A+)	PROSTATE	Bilateral	Overlapping	Middle|Base	NEGATIVE	N0	T3b	T2b	NO	NA	not_fused	not_fused	not_fused	not_fused
	321	TCGA	TCGA-EJ-7125-01	TCGA-EJ-7125-01	PRIMARY	WHITE	NA	44	26.6	7	7	Poly(A+)	PROSTATE	Bilateral	NA	Apex|Middle	NEGATIVE	N0	T2c	T1c	NO	NA	not_fused	not_fused	not_fused	not_fused
	322	TCGA	TCGA-EJ-7793-01	TCGA-EJ-7793-01	PRIMARY	WHITE	NA	49	3	7	7	Poly(A+)	PROSTATE	Bilateral	NA	Apex|Middle	NA	NA	T2c	T2c	NO	NA	fused	not_fused	not_fused	not_fused
	323	TCGA	TCGA-EJ-7321-01	TCGA-EJ-7321-01	PRIMARY	BLACK	NA	57	2.2	6	6	Poly(A+)	PROSTATE	Bilateral	NA	NA	NEGATIVE	N0	T3a	T1c	NO	NA	fused	not_fused	not_fused	not_fused
	324	TCGA	TCGA-HC-8259-01	TCGA-HC-8259-01	PRIMARY	BLACK	NA	50	NA	6	6	Poly(A+)	PROSTATE	Left	NA	NA	NA	NA	T2a	T1c	NO	NA	fused	not_fused	not_fused	not_fused
	325	TCGA	TCGA-HC-8262-01	TCGA-HC-8262-01	PRIMARY	WHITE	NA	57	4.7	8	8	Poly(A+)	PROSTATE	Bilateral	NA	NA	NEGATIVE	N0	T2c	NA	NO	NA	fused	not_fused	not_fused	not_fused
	326	TCGA	TCGA-HC-8261-01	TCGA-HC-8261-01	PRIMARY	BLACK	NA	48	14.4	7	7	Poly(A+)	PROSTATE	Bilateral	NA	NA	NA	NA	T2c	NA	NO	NA	not_fused	not_fused	not_fused	not_fused
	327	TCGA	TCGA-J4-8198-01	TCGA-J4-8198-01	PRIMARY	BLACK	NA	49	17.9	7	7	Poly(A+)	PROSTATE	Bilateral	NA	Apex|Middle|Base	NA	NA	T3b	T1c	NO	NA	fused	not_fused	not_fused	not_fused
	328	TCGA	TCGA-HC-8256-01	TCGA-HC-8256-01	PRIMARY	BLACK	NA	53	6.3	7	7	Poly(A+)	PROSTATE	Bilateral	NA	NA	NA	NA	T2c	NA	NO	NA	not_fused	not_fused	not_fused	not_fused
	329	TCGA	TCGA-HC-8258-01	TCGA-HC-8258-01	PRIMARY	BLACK	NA	56	4.3	6	6	Poly(A+)	PROSTATE	Bilateral	NA	NA	NEGATIVE	N0	T2c	NA	NO	NA	not_fused	not_fused	not_fused	not_fused
	330	TCGA	TCGA-HC-8265-01	TCGA-HC-8265-01	PRIMARY	WHITE	NA	66	5.2	8	8	Poly(A+)	PROSTATE	Bilateral	NA	NA	NEGATIVE	N0	T3a	NA	NO	NA	not_fused	not_fused	not_fused	not_fused
	331	TCGA	TCGA-HC-8266-01	TCGA-HC-8266-01	PRIMARY	WHITE	NA	55	5.1	8	8	Poly(A+)	PROSTATE	Bilateral	NA	NA	NEGATIVE	N0	T3b	NA	NO	NA	not_fused	not_fused	not_fused	not_fused
	332	TCGA	TCGA-HC-8260-01	TCGA-HC-8260-01	PRIMARY	BLACK	NA	43	5.5	7	7	Poly(A+)	PROSTATE	Bilateral	Peripheral Zone	Apex	NEGATIVE	N0	T2c	NA	NO	NA	fused	not_fused	not_fused	not_fused
	333	TCGA	TCGA-G9-7525-01	TCGA-G9-7525-01	PRIMARY	WHITE	NA	64	NA	7	7	Poly(A+)	PROSTATE	Bilateral	NA	Base	NEGATIVE	N0	T2c	T1c	NO	NA	fused	not_fused	not_fused	not_fused
	334	TCGA	TCGA-G9-7510-01	TCGA-G9-7510-01	PRIMARY	WHITE	NA	66	9.7	8	8	Poly(A+)	PROSTATE	Bilateral	NA	Apex	NEGATIVE	N0	T3a	T1c	NO	NA	not_fused	not_fused	fused	not_fused
	335	TCGA	TCGA-G9-7523-01	TCGA-G9-7523-01	PRIMARY	BLACK	NA	44	11.3	10	10	Poly(A+)	PROSTATE	Bilateral	NA	Apex|Base	NEGATIVE	N0	T3a	T1c	NO	NA	not_fused	not_fused	not_fused	not_fused
	336	TCGA	TCGA-G9-7521-01	TCGA-G9-7521-01	PRIMARY	WHITE	NA	52	26.3	8	8	Poly(A+)	PROSTATE	Bilateral	NA	Apex|Base	POSITIVE	N1	T3a	T3a	NO	NA	not_fused	not_fused	not_fused	not_fused
	337	TCGA	TCGA-G9-7519-01	TCGA-G9-7519-01	PRIMARY	WHITE	NA	58	5.1	7	7	Poly(A+)	PROSTATE	Bilateral	NA	Apex|Base	NA	NA	T2c	T1c	NO	NA	not_fused	not_fused	not_fused	not_fused
	338	TCGA	TCGA-G9-7522-01	TCGA-G9-7522-01	PRIMARY	WHITE	NA	49	6.8	7	7	Poly(A+)	PROSTATE	Bilateral	NA	Apex	NEGATIVE	N0	T2c	T1c	NO	NA	fused	not_fused	not_fused	not_fused
	339	TCGA	TCGA-EJ-7797-01	TCGA-EJ-7797-01	PRIMARY	WHITE	NA	53	5.4	7	7	Poly(A+)	PROSTATE	Bilateral	NA	NA	NEGATIVE	N0	T2c	T1c	NO	NA	fused	not_fused	not_fused	not_fused
	340	TCGA	TCGA-HC-8257-01	TCGA-HC-8257-01	PRIMARY	BLACK	NA	70	8.6	7	7	Poly(A+)	PROSTATE	Bilateral	NA	NA	POSITIVE	N1	T3b	NA	NO	NA	fused	not_fused	not_fused	not_fused
	341	TCGA	TCGA-HC-7740-01	TCGA-HC-7740-01	PRIMARY	WHITE	NA	59	5.9	7	7	Poly(A+)	PROSTATE	Bilateral	NA	Apex|Middle|Base	NEGATIVE	N0	T2c	T2a	NO	NA	not_fused	not_fused	not_fused	not_fused
	342	TCGA	TCGA-HC-8261-01	TCGA-HC-8261-01	PRIMARY	BLACK	NA	48	14.4	7	7	Poly(A+)	PROSTATE	Bilateral	NA	NA	NA	NA	T2c	NA	NO	NA	not_fused	not_fused	not_fused	not_fused
	343	TCGA	TCGA-EJ-8474-01	TCGA-EJ-8474-01	PRIMARY	WHITE	NA	69	7.9	8	8	Poly(A+)	PROSTATE	Bilateral	NA	NA	NEGATIVE	N0	T3a	T3a	NO	NA	not_fused	not_fused	not_fused	not_fused
	344	TCGA	TCGA-EJ-8469-01	TCGA-EJ-8469-01	PRIMARY	BLACK	NA	46	NA	9	9	Poly(A+)	PROSTATE	Bilateral	NA	NA	NEGATIVE	N0	T3a	T3a	YES	1925	fused	not_fused	not_fused	not_fused
	345	TCGA	TCGA-EJ-8468-01	TCGA-EJ-8468-01	PRIMARY	WHITE	NA	63	25.4	8	8	Poly(A+)	PROSTATE	Left	NA	NA	NEGATIVE	N0	T3a	T3a	NO	NA	not_fused	not_fused	not_fused	not_fused
	346	TCGA	TCGA-EJ-8470-01	TCGA-EJ-8470-01	PRIMARY	BLACK	NA	58	NA	7	7	Poly(A+)	PROSTATE	Bilateral	NA	NA	NEGATIVE	N0	T2c	T2c	NO	NA	not_fused	not_fused	not_fused	not_fused
	347	TCGA	TCGA-EJ-8472-01	TCGA-EJ-8472-01	PRIMARY	WHITE	NA	63	NA	8	8	Poly(A+)	PROSTATE	NA	NA	NA	NEGATIVE	N0	T3a	T3a	YES	196	fused	not_fused	not_fused	not_fused
	348	TCGA	TCGA-HC-8264-01	TCGA-HC-8264-01	PRIMARY	WHITE	NA	60	13.4	9	9	Poly(A+)	PROSTATE	Bilateral	NA	NA	POSITIVE	N1	T3b	NA	NO	NA	not_fused	not_fused	not_fused	not_fused
	349	TCGA	TCGA-EJ-5502-01	TCGA-EJ-5502-01	PRIMARY	NA	NA	50	5.3	7	7	Poly(A+)	PROSTATE	Bilateral	Overlapping	Middle|Base	NEGATIVE	N0	T2c	T2c	NO	NA	fused	not_fused	not_fused	not_fused
	350	TCGA	TCGA-EJ-5503-01	TCGA-EJ-5503-01	PRIMARY	WHITE	NA	50	18.4	8	8	Poly(A+)	PROSTATE	Bilateral	Overlapping	Middle|Base	NEGATIVE	N0	T3a	T2b	NO	NA	fused	not_fused	not_fused	not_fused
	351	TCGA	TCGA-FC-A4JI-01	TCGA-FC-A4JI-01	PRIMARY	ASIAN	NA	70	51.7	8	8	Poly(A+)	PROSTATE	Bilateral	Central Zone	Apex|Middle|Base	NA	NA	T3a	T4	NO	NA	not_fused	not_fused	not_fused	not_fused
	352	TCGA	TCGA-HC-A48F-01	TCGA-HC-A48F-01	PRIMARY	WHITE	NA	47	NA	8	8	Poly(A+)	PROSTATE	Bilateral	Overlapping	NA	POSITIVE	N1	T2c	T1c	NO	NA	fused	not_fused	not_fused	not_fused
	353	TCGA	TCGA-EJ-A46F-01	TCGA-EJ-A46F-01	PRIMARY	WHITE	NA	57	NA	8	8	Poly(A+)	PROSTATE	Bilateral	NA	NA	POSITIVE	N1	T3b	T2c	YES	215	fused	not_fused	not_fused	not_fused
	354	TCGA	TCGA-CH-5745-01	TCGA-CH-5745-01	PRIMARY	WHITE	NA	68	NA	7	7	Poly(A+)	PROSTATE	NA	Overlapping	NA	NEGATIVE	N0	T3a	NA	NO	NA	not_fused	fused	not_fused	not_fused
	355	TCGA	TCGA-CH-5761-01	TCGA-CH-5761-01	PRIMARY	WHITE	NA	61	8.5	9	9	Poly(A+)	PROSTATE	Left	Peripheral Zone	NA	NEGATIVE	N0	T3b	NA	NO	NA	not_fused	not_fused	not_fused	not_fused
	356	TCGA	TCGA-G9-6351-01	TCGA-G9-6351-01	PRIMARY	WHITE	NA	51	6.8	7	7	Poly(A+)	PROSTATE	Bilateral	NA	Apex	NA	NA	T2c	T1c	NO	NA	fused	not_fused	not_fused	fused
	357	TCGA	TCGA-G9-6342-01	TCGA-G9-6342-01	PRIMARY	WHITE	NA	61	3.3	6	6	Poly(A+)	PROSTATE	Bilateral	NA	Apex|Base	NA	NA	T3a	T2c	NO	NA	fused	not_fused	not_fused	not_fused
	358	TCGA	TCGA-HC-7079-01	TCGA-HC-7079-01	PRIMARY	WHITE	NA	51	5.5	7	7	Poly(A+)	PROSTATE	Bilateral	NA	Apex|Middle|Base	NEGATIVE	N0	T3a	T3a	NO	NA	not_fused	not_fused	not_fused	fused
	359	TCGA	TCGA-G9-6333-01	TCGA-G9-6333-01	PRIMARY	WHITE	NA	66	10.8	7	7	Poly(A+)	PROSTATE	Bilateral	NA	Apex|Base	NEGATIVE	N0	T2c	T1c	NO	NA	not_fused	not_fused	not_fused	not_fused
	360	TCGA	TCGA-HC-7077-01	TCGA-HC-7077-01	PRIMARY	BLACK	NA	64	7.6	6	6	Poly(A+)	PROSTATE	Bilateral	NA	NA	NA	NA	T3a	T1c	NO	NA	fused	not_fused	not_fused	fused
	361	TCGA	TCGA-G9-6499-01	TCGA-G9-6499-01	PRIMARY	WHITE	NA	66	8.2	9	9	Poly(A+)	PROSTATE	Bilateral	NA	Apex|Base	NEGATIVE	N0	T3a	T3a	NO	NA	not_fused	not_fused	not_fused	not_fused
	362	TCGA	TCGA-HC-7737-01	TCGA-HC-7737-01	PRIMARY	BLACK	NA	55	18.1	7	7	Poly(A+)	PROSTATE	Bilateral	NA	NA	POSITIVE	N1	T2c	T1c	NO	NA	not_fused	not_fused	not_fused	not_fused
	363	TCGA	TCGA-G9-6369-01	TCGA-G9-6369-01	PRIMARY	WHITE	NA	55	NA	7	7	Poly(A+)	PROSTATE	Bilateral	NA	Base	NEGATIVE	N0	T2c	T1c	NO	NA	not_fused	not_fused	not_fused	not_fused
	364	TCGA	TCGA-EJ-A46H-01	TCGA-EJ-A46H-01	PRIMARY	BLACK	NA	60	NA	7	7	Poly(A+)	PROSTATE	Bilateral	NA	NA	NEGATIVE	N0	T2c	T1c	NO	NA	not_fused	not_fused	not_fused	not_fused
	365	TCGA	TCGA-HC-A4ZV-01	TCGA-HC-A4ZV-01	PRIMARY	BLACK	NA	56	70	9	9	Poly(A+)	PROSTATE	Bilateral	Overlapping	NA	NEGATIVE	N0	T3b	T2c	NO	NA	not_fused	not_fused	not_fused	not_fused
	366	TCGA	TCGA-KC-A4BL-01	TCGA-KC-A4BL-01	PRIMARY	BLACK	NA	65	NA	7	7	Poly(A+)	PROSTATE	Bilateral	Peripheral Zone	Middle|Base	NEGATIVE	N0	T2c	T1c	YES	193	not_fused	not_fused	not_fused	not_fused
	367	TCGA	TCGA-EJ-A46I-01	TCGA-EJ-A46I-01	PRIMARY	BLACK	NA	57	8.5	7	7	Poly(A+)	PROSTATE	Bilateral	NA	NA	NEGATIVE	N0	T3a	T1c	NO	NA	fused	not_fused	not_fused	not_fused
	368	TCGA	TCGA-EJ-A46B-01	TCGA-EJ-A46B-01	PRIMARY	WHITE	NA	66	NA	8	8	Poly(A+)	PROSTATE	Bilateral	NA	NA	NEGATIVE	N0	T3a	T1c	NO	NA	not_fused	not_fused	not_fused	not_fused
	369	TCGA	TCGA-J9-A52B-01	TCGA-J9-A52B-01	PRIMARY	WHITE	NA	62	7.2	9	9	Poly(A+)	PROSTATE	Bilateral	Overlapping	Apex|Middle|Base	NEGATIVE	N0	T3b	T3b	YES	85	fused	not_fused	not_fused	not_fused
	370	TCGA	TCGA-KK-A59Y-01	TCGA-KK-A59Y-01	PRIMARY	WHITE	NA	56	14.7	9	9	Poly(A+)	PROSTATE	Bilateral	Peripheral Zone	Apex|Middle|Base	POSITIVE	N1	T3a	T3a	NO	NA	fused	not_fused	not_fused	not_fused
	371	TCGA	TCGA-EJ-A46G-01	TCGA-EJ-A46G-01	PRIMARY	WHITE	NA	71	5.1	8	8	Poly(A+)	PROSTATE	Bilateral	NA	NA	NEGATIVE	N0	T3a	T3a	NO	NA	not_fused	not_fused	not_fused	not_fused
	372	TCGA	TCGA-J9-A52C-01	TCGA-J9-A52C-01	PRIMARY	WHITE	NA	57	NA	9	9	Poly(A+)	PROSTATE	Bilateral	Overlapping	Apex|Middle|Base	NA	NA	T3b	T1c	NO	NA	not_fused	not_fused	not_fused	not_fused
	373	TCGA	TCGA-EJ-A46E-01	TCGA-EJ-A46E-01	PRIMARY	WHITE	NA	57	NA	8	8	Poly(A+)	PROSTATE	Bilateral	NA	NA	NEGATIVE	N0	NA	T1c	NO	NA	not_fused	not_fused	not_fused	not_fused
	374	TCGA	TCGA-KC-A4BV-01	TCGA-KC-A4BV-01	PRIMARY	ASIAN	NA	66	12.9	9	9	Poly(A+)	PROSTATE	Bilateral	Overlapping	Apex|Middle|Base	NEGATIVE	N0	T3a	T2	YES	1328	fused	not_fused	not_fused	not_fused
	375	TCGA	TCGA-KC-A4BN-01	TCGA-KC-A4BN-01	PRIMARY	BLACK	NA	55	6.7	7	7	Poly(A+)	PROSTATE	Right	NA	Middle	NEGATIVE	N0	T2a	T1c	NO	NA	fused	not_fused	not_fused	not_fused
	376	TCGA	TCGA-J9-A52E-01	TCGA-J9-A52E-01	PRIMARY	WHITE	NA	65	NA	9	9	Poly(A+)	PROSTATE	Bilateral	Overlapping	Apex|Middle|Base	NEGATIVE	N0	T3b	T2c	YES	89	not_fused	not_fused	not_fused	not_fused
	377	TCGA	TCGA-KK-A59Z-01	TCGA-KK-A59Z-01	PRIMARY	BLACK	NA	66	3.5	7	7	Poly(A+)	PROSTATE	Bilateral	Peripheral Zone	Apex|Middle|Base	NEGATIVE	N0	T2c	T2b	NO	NA	not_fused	not_fused	not_fused	not_fused
	378	TCGA	TCGA-EJ-A65E-01	TCGA-EJ-A65E-01	PRIMARY	BLACK	NA	67	56.4	7	7	Poly(A+)	PROSTATE	Bilateral	NA	NA	NEGATIVE	N0	T3b	T3b	NO	NA	not_fused	not_fused	not_fused	not_fused
	379	TCGA	TCGA-HC-8216-01	TCGA-HC-8216-01	PRIMARY	WHITE	NA	58	5.2	7	7	Poly(A+)	PROSTATE	Right	NA	Middle|Base	NEGATIVE	N0	T3a	T2a	NO	NA	not_fused	not_fused	not_fused	not_fused
	380	TCGA	TCGA-HC-A631-01	TCGA-HC-A631-01	PRIMARY	WHITE	NA	67	3.3	9	9	Poly(A+)	PROSTATE	Bilateral	NA	NA	NEGATIVE	N0	T2c	T2	NO	NA	not_fused	not_fused	not_fused	not_fused
	381	TCGA	TCGA-HC-A632-01	TCGA-HC-A632-01	PRIMARY	WHITE	NA	68	2.2	9	9	Poly(A+)	PROSTATE	Bilateral	NA	NA	NEGATIVE	N0	T3a	T1c	NO	NA	fused	not_fused	not_fused	not_fused
	382	TCGA	TCGA-EJ-A65M-01	TCGA-EJ-A65M-01	PRIMARY	BLACK	NA	65	NA	6	6	Poly(A+)	PROSTATE	Bilateral	NA	NA	NEGATIVE	N0	T2c	T2c	NO	NA	not_fused	not_fused	not_fused	not_fused
	383	TCGA	TCGA-J4-8200-01	TCGA-J4-8200-01	PRIMARY	ASIAN	NA	47	8.6	7	7	Poly(A+)	PROSTATE	Bilateral	Overlapping	NA	NEGATIVE	N0	T2c	T2	NO	NA	not_fused	not_fused	not_fused	not_fused
	384	TCGA	TCGA-FC-7961-01	TCGA-FC-7961-01	PRIMARY	WHITE	NA	62	24.7	9	9	Poly(A+)	PROSTATE	Bilateral	Peripheral Zone	Apex	NEGATIVE	N0	T3a	T1c	NO	NA	not_fused	not_fused	not_fused	not_fused
	385	TCGA	TCGA-J9-A52D-01	TCGA-J9-A52D-01	PRIMARY	WHITE	NA	71	NA	9	9	Poly(A+)	PROSTATE	Bilateral	Transition Zone	Apex|Middle	NA	NA	T3a	T2b	NO	NA	not_fused	not_fused	not_fused	not_fused
	386	TCGA	TCGA-EJ-A65G-01	TCGA-EJ-A65G-01	PRIMARY	WHITE	NA	57	6.8	8	8	Poly(A+)	PROSTATE	Bilateral	NA	NA	NEGATIVE	N0	T2c	T2c	NO	NA	not_fused	not_fused	not_fused	not_fused
	387	TCGA	TCGA-HC-7817-01	TCGA-HC-7817-01	PRIMARY	WHITE	NA	52	NA	7	7	Poly(A+)	PROSTATE	Bilateral	NA	Apex|Middle|Base	NA	NA	T3b	NA	NO	NA	not_fused	not_fused	not_fused	not_fused
	388	TCGA	TCGA-FC-A5OB-01	TCGA-FC-A5OB-01	PRIMARY	WHITE	NA	53	26.9	9	9	Poly(A+)	PROSTATE	Bilateral	Overlapping	Middle|Base	NEGATIVE	N0	T3b	T3a	NO	NA	not_fused	not_fused	not_fused	not_fused
	389	TCGA	TCGA-KK-A59V-01	TCGA-KK-A59V-01	PRIMARY	WHITE	NA	64	NA	9	9	Poly(A+)	PROSTATE	Bilateral	Peripheral Zone	Apex|Middle|Base	NEGATIVE	N0	T3b	T3a	NO	NA	not_fused	not_fused	not_fused	not_fused
	390	TCGA	TCGA-HC-8213-01	TCGA-HC-8213-01	PRIMARY	WHITE	NA	48	3.6	6	6	Poly(A+)	PROSTATE	Bilateral	NA	NA	NA	NA	T2c	NA	NO	NA	fused	not_fused	not_fused	not_fused
	391	TCGA	TCGA-KK-A59X-01	TCGA-KK-A59X-01	PRIMARY	BLACK	NA	55	26.3	9	9	Poly(A+)	PROSTATE	Bilateral	Peripheral Zone	Apex|Middle|Base	POSITIVE	N1	T3b	T3a	NO	NA	not_fused	not_fused	not_fused	not_fused
	392	TCGA	TCGA-KK-A5A1-01	TCGA-KK-A5A1-01	PRIMARY	BLACK	NA	72	NA	9	9	Poly(A+)	PROSTATE	Bilateral	Overlapping	Apex|Middle|Base	NEGATIVE	N0	T3b	T3a	NO	NA	not_fused	not_fused	not_fused	not_fused
	393	TCGA	TCGA-G9-6354-01	TCGA-G9-6354-01	PRIMARY	ASIAN	NA	55	NA	7	7	Poly(A+)	PROSTATE	Right	NA	Apex|Base	NA	NA	T2b	T1c	NO	NA	fused	not_fused	not_fused	not_fused
	394	TCGA	TCGA-G9-6339-01	TCGA-G9-6339-01	PRIMARY	WHITE	NA	58	NA	7	7	Poly(A+)	PROSTATE	Bilateral	NA	Apex|Middle|Base	NEGATIVE	N0	T3b	T3b	YES	1634	not_fused	fused	not_fused	not_fused
	395	TCGA	TCGA-J4-A6G1-01	TCGA-J4-A6G1-01	PRIMARY	WHITE	NA	68	8.2	8	8	Poly(A+)	PROSTATE	Bilateral	Peripheral Zone	NA	NEGATIVE	N0	T3a	T2b	NO	NA	fused	not_fused	not_fused	not_fused
	396	TCGA	TCGA-G9-6498-01	TCGA-G9-6498-01	PRIMARY	WHITE	NA	53	NA	7	7	Poly(A+)	PROSTATE	Bilateral	NA	Apex	NA	NA	T3a	T1c	YES	1342	not_fused	not_fused	not_fused	not_fused
	397	TCGA	TCGA-J4-A6G3-01	TCGA-J4-A6G3-01	PRIMARY	WHITE	NA	57	7.5	8	8	Poly(A+)	PROSTATE	Bilateral	Peripheral Zone	NA	NEGATIVE	N0	T3b	T2	NO	NA	not_fused	not_fused	not_fused	not_fused
	398	TCGA	TCGA-EJ-A65J-01	TCGA-EJ-A65J-01	PRIMARY	WHITE	NA	62	30.7	9	9	Poly(A+)	PROSTATE	Bilateral	NA	NA	NEGATIVE	N0	T3a	T3a	NO	NA	not_fused	not_fused	not_fused	not_fused
	399	TCGA	TCGA-H9-A6BX-01	TCGA-H9-A6BX-01	PRIMARY	WHITE	NA	60	NA	6	6	Poly(A+)	PROSTATE	Bilateral	NA	NA	NA	NA	T2c	NA	NO	NA	not_fused	not_fused	not_fused	not_fused
	400	TCGA	TCGA-KK-A6DY-01	TCGA-KK-A6DY-01	PRIMARY	BLACK	NA	50	4.9	7	7	Poly(A+)	PROSTATE	Bilateral	Peripheral Zone	Apex|Middle|Base	NEGATIVE	N0	T2c	T1c	NO	NA	fused	not_fused	not_fused	not_fused
	401	TCGA	TCGA-EJ-A65F-01	TCGA-EJ-A65F-01	PRIMARY	WHITE	NA	59	25	9	9	Poly(A+)	PROSTATE	Bilateral	NA	NA	NEGATIVE	N0	T3b	T3b	YES	75	fused	not_fused	not_fused	not_fused
	402	TCGA	TCGA-J4-A67T-01	TCGA-J4-A67T-01	PRIMARY	WHITE	NA	63	5.5	7	7	Poly(A+)	PROSTATE	Bilateral	Peripheral Zone	Apex|Middle	NA	NA	T2c	T1c	NO	NA	fused	not_fused	not_fused	not_fused
	403	TCGA	TCGA-KK-A6E0-01	TCGA-KK-A6E0-01	PRIMARY	ASIAN	NA	59	13.9	9	9	Poly(A+)	PROSTATE	Right	Peripheral Zone	Apex|Middle|Base	NEGATIVE	N0	T3a	T2b	YES	941	not_fused	not_fused	not_fused	not_fused
	404	TCGA	TCGA-KK-A6E6-01	TCGA-KK-A6E6-01	PRIMARY	WHITE	NA	69	10.3	9	9	Poly(A+)	PROSTATE	Bilateral	Peripheral Zone	Apex|Middle|Base	NEGATIVE	N0	T3a	T2b	NO	NA	fused	not_fused	not_fused	not_fused
	405	TCGA	TCGA-KK-A6E5-01	TCGA-KK-A6E5-01	PRIMARY	BLACK	NA	63	9.4	7	7	Poly(A+)	PROSTATE	Bilateral	Peripheral Zone	Apex|Middle|Base	NEGATIVE	N0	T3b	T1c	NO	NA	not_fused	not_fused	not_fused	not_fused
	406	TCGA	TCGA-KK-A6E1-01	TCGA-KK-A6E1-01	PRIMARY	WHITE	NA	57	25.6	9	9	Poly(A+)	PROSTATE	Bilateral	Overlapping	Apex|Middle|Base	POSITIVE	N1	T3b	T2c	NO	NA	fused	not_fused	not_fused	not_fused
	407	TCGA	TCGA-KK-A6E2-01	TCGA-KK-A6E2-01	PRIMARY	BLACK	NA	54	6.7	7	7	Poly(A+)	PROSTATE	Bilateral	Transition Zone	Apex|Middle|Base	NEGATIVE	N0	T2c	T2a	NO	NA	fused	not_fused	not_fused	not_fused
	408	TCGA	TCGA-HC-A6HY-01	TCGA-HC-A6HY-01	PRIMARY	WHITE	NA	51	NA	7	7	Poly(A+)	PROSTATE	Bilateral	NA	NA	NA	NA	T2c	T1c	NO	NA	fused	not_fused	not_fused	not_fused
	409	TCGA	TCGA-J4-A6M7-01	TCGA-J4-A6M7-01	PRIMARY	WHITE	NA	53	6.2	7	7	Poly(A+)	PROSTATE	Bilateral	Peripheral Zone	Apex|Middle	NA	NA	T2c	T2	NO	NA	fused	not_fused	not_fused	not_fused
	410	TCGA	TCGA-KK-A6E7-01	TCGA-KK-A6E7-01	PRIMARY	NA	NA	46	NA	9	9	Poly(A+)	PROSTATE	Bilateral	Transition Zone	Apex|Middle	POSITIVE	N1	T3a	T1c	NO	NA	not_fused	not_fused	not_fused	not_fused
	411	TCGA	TCGA-KK-A6E8-01	TCGA-KK-A6E8-01	PRIMARY	WHITE	NA	68	NA	9	9	Poly(A+)	PROSTATE	Bilateral	Transition Zone	Apex|Middle|Base	NEGATIVE	N0	T2c	T1c	NO	NA	not_fused	not_fused	not_fused	not_fused
	412	TCGA	TCGA-G9-6347-01	TCGA-G9-6347-01	PRIMARY	NA	NA	59	NA	6	6	Poly(A+)	PROSTATE	Bilateral	Peripheral Zone	Apex|Middle	NA	NA	T2c	T1c	NO	NA	not_fused	not_fused	not_fused	not_fused
	413	TCGA	TCGA-HC-A6HX-01	TCGA-HC-A6HX-01	PRIMARY	WHITE	NA	55	NA	7	7	Poly(A+)	PROSTATE	Bilateral	NA	NA	NEGATIVE	N0	T2c	T1c	NO	NA	not_fused	not_fused	not_fused	not_fused
	414	TCGA	TCGA-G9-6379-01	TCGA-G9-6379-01	PRIMARY	WHITE	NA	68	NA	7	7	Poly(A+)	PROSTATE	Bilateral	NA	Apex	NEGATIVE	N0	T3b	T1b	NO	NA	not_fused	not_fused	not_fused	not_fused
	415	TCGA	TCGA-QU-A6IL-01	TCGA-QU-A6IL-01	PRIMARY	ASIAN	NA	64	NA	7	7	Poly(A+)	PROSTATE	Bilateral	NA	Apex|Middle|Base	NEGATIVE	N0	T2c	T2a	NO	NA	not_fused	not_fused	not_fused	not_fused
	416	TCGA	TCGA-EJ-A65D-01	TCGA-EJ-A65D-01	PRIMARY	WHITE	NA	66	NA	8	8	Poly(A+)	PROSTATE	Bilateral	NA	NA	NEGATIVE	N0	T3a	T3a	NO	NA	fused	not_fused	not_fused	not_fused
	417	TCGA	TCGA-QU-A6IN-01	TCGA-QU-A6IN-01	PRIMARY	WHITE	NA	61	NA	7	7	Poly(A+)	PROSTATE	Bilateral	NA	Apex|Middle|Base	NEGATIVE	N0	T2c	T1c	NO	NA	fused	not_fused	not_fused	not_fused
	418	TCGA	TCGA-QU-A6IO-01	TCGA-QU-A6IO-01	PRIMARY	BLACK	NA	53	NA	6	6	Poly(A+)	PROSTATE	Bilateral	NA	Apex|Middle|Base	NEGATIVE	N0	T2c	T1c	NO	NA	not_fused	not_fused	not_fused	not_fused
	419	TCGA	TCGA-HC-A6AO-01	TCGA-HC-A6AO-01	PRIMARY	WHITE	NA	52	NA	7	7	Poly(A+)	PROSTATE	Bilateral	NA	NA	NA	NA	T2c	T1c	NO	NA	not_fused	not_fused	not_fused	not_fused
	420	TCGA	TCGA-QU-A6IM-01	TCGA-QU-A6IM-01	PRIMARY	WHITE	NA	59	NA	7	7	Poly(A+)	PROSTATE	Left	NA	Apex|Middle	NEGATIVE	N0	T2a	T2b	NO	NA	not_fused	not_fused	not_fused	not_fused
	421	TCGA	TCGA-FC-A66V-01	TCGA-FC-A66V-01	PRIMARY	WHITE	NA	74	NA	7	7	Poly(A+)	PROSTATE	Bilateral	Overlapping	Middle|Base	NEGATIVE	N0	T3b	T3b	NO	NA	not_fused	not_fused	not_fused	not_fused
	422	TCGA	TCGA-EJ-A65B-01	TCGA-EJ-A65B-01	PRIMARY	WHITE	NA	55	NA	9	9	Poly(A+)	PROSTATE	NA	NA	NA	NEGATIVE	N0	T3b	T3b	NO	NA	not_fused	not_fused	not_fused	not_fused
	423	TCGA	TCGA-J4-A67O-01	TCGA-J4-A67O-01	PRIMARY	WHITE	NA	59	NA	7	7	Poly(A+)	PROSTATE	Bilateral	Peripheral Zone	Apex	NEGATIVE	N0	T2c	T2a	NO	NA	not_fused	not_fused	not_fused	not_fused
	424	TCGA	TCGA-J4-A67N-01	TCGA-J4-A67N-01	PRIMARY	WHITE	NA	61	NA	7	7	Poly(A+)	PROSTATE	Bilateral	Peripheral Zone	Apex|Middle|Base	NEGATIVE	N0	T3a	T2a	YES	442	fused	not_fused	not_fused	not_fused
	425	TCGA	TCGA-KK-A6E4-01	TCGA-KK-A6E4-01	PRIMARY	BLACK	NA	69	NA	7	7	Poly(A+)	PROSTATE	Right	Peripheral Zone	Apex|Middle|Base	NEGATIVE	N0	T2b	T1c	NO	NA	fused	not_fused	not_fused	not_fused
	426	TCGA	TCGA-HC-A6AQ-01	TCGA-HC-A6AQ-01	PRIMARY	WHITE	NA	60	NA	7	7	Poly(A+)	PROSTATE	Bilateral	NA	NA	NA	NA	T2c	T1c	NO	NA	not_fused	fused	not_fused	not_fused
	427	TCGA	TCGA-H9-A6BY-01	TCGA-H9-A6BY-01	PRIMARY	WHITE	NA	63	NA	7	7	Poly(A+)	PROSTATE	Bilateral	Overlapping	NA	NEGATIVE	N0	T3a	T1c	NO	NA	fused	not_fused	not_fused	not_fused
	428	TCGA	TCGA-HC-A6AL-01	TCGA-HC-A6AL-01	PRIMARY	WHITE	NA	64	NA	7	7	Poly(A+)	PROSTATE	Bilateral	NA	NA	NEGATIVE	N0	T2c	T1c	NO	NA	not_fused	not_fused	not_fused	not_fused
	429	TCGA	TCGA-HC-A6AS-01	TCGA-HC-A6AS-01	PRIMARY	WHITE	NA	70	NA	7	7	Poly(A+)	PROSTATE	Right	NA	NA	NEGATIVE	N0	T2a	T1c	NO	NA	not_fused	not_fused	not_fused	not_fused
	430	TCGA	TCGA-HC-A6AP-01	TCGA-HC-A6AP-01	PRIMARY	WHITE	NA	61	NA	7	7	Poly(A+)	PROSTATE	Bilateral	Overlapping	NA	NA	NA	T2c	T1c	NO	NA	not_fused	not_fused	not_fused	not_fused
	431	TCGA	TCGA-KK-A6E3-01	TCGA-KK-A6E3-01	PRIMARY	BLACK	NA	56	NA	7	7	Poly(A+)	PROSTATE	Bilateral	Transition Zone	Apex|Middle|Base	NEGATIVE	N0	T2c	T1c	NO	NA	not_fused	not_fused	not_fused	not_fused
	432	TCGA	TCGA-J4-A67K-01	TCGA-J4-A67K-01	PRIMARY	WHITE	NA	68	NA	7	7	Poly(A+)	PROSTATE	Bilateral	Peripheral Zone	NA	NA	NA	T2c	T2b	NO	NA	fused	not_fused	not_fused	not_fused
	433	TCGA	TCGA-J4-A67Q-01	TCGA-J4-A67Q-01	PRIMARY	WHITE	NA	77	NA	6	6	Poly(A+)	PROSTATE	Bilateral	Peripheral Zone	Apex|Middle	NA	NA	T2c	T2b	NO	NA	not_fused	not_fused	not_fused	not_fused
	434	TCGA	TCGA-J4-A67M-01	TCGA-J4-A67M-01	PRIMARY	WHITE	NA	55	NA	7	7	Poly(A+)	PROSTATE	Bilateral	Peripheral Zone	Apex|Middle|Base	NEGATIVE	N0	T3a	T2a	NO	NA	not_fused	not_fused	not_fused	not_fused
	435	TCGA	TCGA-J4-A67S-01	TCGA-J4-A67S-01	PRIMARY	WHITE	NA	63	NA	7	7	Poly(A+)	PROSTATE	Bilateral	Peripheral Zone	Apex|Middle|Base	NEGATIVE	N0	T3a	T2b	NO	NA	fused	not_fused	not_fused	not_fused
	436	TCGA	TCGA-HC-A6AN-01	TCGA-HC-A6AN-01	PRIMARY	WHITE	NA	67	NA	7	7	Poly(A+)	PROSTATE	Bilateral	NA	NA	NEGATIVE	N0	T3a	T1c	NO	NA	fused	not_fused	not_fused	not_fused
	437	TCGA	TCGA-J4-A67L-01	TCGA-J4-A67L-01	PRIMARY	WHITE	NA	54	NA	7	7	Poly(A+)	PROSTATE	Left	Peripheral Zone	Apex|Middle|Base	NEGATIVE	N0	T3a	T2a	NO	NA	fused	not_fused	not_fused	not_fused
	438	TCGA	TCGA-J4-A67R-01	TCGA-J4-A67R-01	PRIMARY	WHITE	NA	65	NA	7	7	Poly(A+)	PROSTATE	Bilateral	Peripheral Zone	Middle|Base	NEGATIVE	N0	T2c	T1c	NO	NA	fused	not_fused	not_fused	not_fused
	439	TCGA	TCGA-QU-A6IP-01	TCGA-QU-A6IP-01	PRIMARY	WHITE	NA	66	4.5	6	6	Poly(A+)	PROSTATE	Right	NA	Middle|Base	NEGATIVE	N0	T2a	T2a	NO	NA	fused	not_fused	not_fused	not_fused
	440	TCGA	TCGA-FC-A6HD-01	TCGA-FC-A6HD-01	PRIMARY	WHITE	NA	77	NA	7	7	Poly(A+)	PROSTATE	Bilateral	Overlapping	Middle	NEGATIVE	N0	T3a	T3a	NO	NA	not_fused	not_fused	not_fused	not_fused
	441	TCGA	TCGA-M7-A71Z-01	TCGA-M7-A71Z-01	PRIMARY	WHITE	NA	62	NA	7	7	Poly(A+)	PROSTATE	Right	Overlapping	Apex|Base	NEGATIVE	N0	T3a	T2a	NO	NA	fused	not_fused	not_fused	not_fused
	442	TCGA	TCGA-KK-A7B0-01	TCGA-KK-A7B0-01	PRIMARY	WHITE	NA	67	NA	9	9	Poly(A+)	PROSTATE	Bilateral	Overlapping	Apex|Middle|Base	NEGATIVE	N0	T3b	T2b	YES	606	not_fused	not_fused	not_fused	not_fused
	443	TCGA	TCGA-M7-A720-01	TCGA-M7-A720-01	PRIMARY	WHITE	NA	53	NA	6	6	Poly(A+)	PROSTATE	Bilateral	Peripheral Zone	Middle|Base	NA	NA	T2c	T1c	NO	NA	not_fused	not_fused	not_fused	not_fused
	444	TCGA	TCGA-M7-A724-01	TCGA-M7-A724-01	PRIMARY	WHITE	NA	64	NA	8	8	Poly(A+)	PROSTATE	Right	Peripheral Zone	Apex|Base	NEGATIVE	N0	T3a	T1c	NO	NA	not_fused	not_fused	not_fused	not_fused
	445	TCGA	TCGA-M7-A725-01	TCGA-M7-A725-01	PRIMARY	WHITE	NA	56	NA	7	7	Poly(A+)	PROSTATE	Bilateral	Overlapping	Apex|Base	NEGATIVE	N0	T3b	T3a	NO	NA	not_fused	not_fused	not_fused	fused
	446	TCGA	TCGA-EJ-7218-01	TCGA-EJ-7218-01	PRIMARY	WHITE	NA	71	NA	7	7	Poly(A+)	PROSTATE	Bilateral	NA	NA	NEGATIVE	N0	T2c	T2a	NO	NA	not_fused	not_fused	not_fused	not_fused
	447	TCGA	TCGA-KK-A7AU-01	TCGA-KK-A7AU-01	PRIMARY	WHITE	NA	63	NA	9	9	Poly(A+)	PROSTATE	Bilateral	Peripheral Zone	Apex|Middle|Base	POSITIVE	N1	T3b	T2b	YES	207	fused	not_fused	not_fused	not_fused
	448	TCGA	TCGA-KK-A7AW-01	TCGA-KK-A7AW-01	PRIMARY	BLACK	NA	57	NA	7	7	Poly(A+)	PROSTATE	Right	Peripheral Zone	Apex|Middle|Base	POSITIVE	N1	T3a	T2a	YES	204	not_fused	not_fused	not_fused	fused
	449	TCGA	TCGA-KK-A7AZ-01	TCGA-KK-A7AZ-01	PRIMARY	WHITE	NA	56	NA	7	7	Poly(A+)	PROSTATE	Right	Peripheral Zone	Apex|Middle|Base	NEGATIVE	N0	T3a	T2b	NO	NA	not_fused	not_fused	not_fused	not_fused
	450	TCGA	TCGA-EJ-A6RC-01	TCGA-EJ-A6RC-01	PRIMARY	WHITE	NA	64	NA	7	7	Poly(A+)	PROSTATE	Bilateral	NA	NA	NEGATIVE	N0	NA	T1c	NO	NA	not_fused	not_fused	not_fused	not_fused
	451	TCGA	TCGA-M7-A71Y-01	TCGA-M7-A71Y-01	PRIMARY	WHITE	NA	55	NA	7	7	Poly(A+)	PROSTATE	Bilateral	Overlapping	Apex|Middle|Base	NA	NA	T2c	T1c	NO	NA	not_fused	fused	not_fused	not_fused
	452	TCGA	TCGA-EJ-7312-01	TCGA-EJ-7312-01	PRIMARY	WHITE	NA	58	NA	7	7	Poly(A+)	PROSTATE	Bilateral	NA	NA	NEGATIVE	N0	T3b	T3b	NO	NA	NA	NA	NA	NA
	453	TCGA	TCGA-EJ-A46D-01	TCGA-EJ-A46D-01	PRIMARY	WHITE	NA	53	NA	8	8	Poly(A+)	PROSTATE	Bilateral	NA	NA	NEGATIVE	N0	T2c	T2c	NO	NA	fused	not_fused	not_fused	not_fused
	454	TCGA	TCGA-M7-A721-01	TCGA-M7-A721-01	PRIMARY	WHITE	NA	70	NA	7	7	Poly(A+)	PROSTATE	Bilateral	Overlapping	Apex|Middle|Base	NA	NA	T2c	T1c	NO	NA	not_fused	not_fused	not_fused	not_fused
	455	TCGA	TCGA-KK-A7B4-01	TCGA-KK-A7B4-01	PRIMARY	WHITE	NA	64	NA	9	9	Poly(A+)	PROSTATE	Bilateral	Overlapping	Apex|Middle|Base	POSITIVE	N1	T3b	T3b	YES	637	fused	not_fused	not_fused	not_fused
	456	TCGA	TCGA-KK-A7B1-01	TCGA-KK-A7B1-01	PRIMARY	WHITE	NA	65	NA	7	7	Poly(A+)	PROSTATE	Bilateral	Peripheral Zone	Apex|Middle|Base	NEGATIVE	N0	T3a	T1c	NO	NA	fused	not_fused	not_fused	not_fused
	457	TCGA	TCGA-EJ-7318-01	TCGA-EJ-7318-01	PRIMARY	WHITE	NA	51	NA	7	7	Poly(A+)	PROSTATE	Bilateral	NA	NA	NA	NA	T3a	T3a	YES	189	not_fused	not_fused	not_fused	not_fused
	458	TCGA	TCGA-EJ-7325-01	TCGA-EJ-7325-01	PRIMARY	WHITE	NA	63	NA	7	7	Poly(A+)	PROSTATE	Bilateral	NA	NA	NEGATIVE	N0	T3b	T3b	NO	NA	fused	not_fused	not_fused	not_fused
	459	TCGA	TCGA-KK-A7B2-01	TCGA-KK-A7B2-01	PRIMARY	WHITE	NA	68	NA	9	9	Poly(A+)	PROSTATE	Left	Overlapping	Apex|Middle|Base	POSITIVE	N1	T3a	T1c	NO	NA	fused	not_fused	not_fused	not_fused
	460	TCGA	TCGA-KK-A7AV-01	TCGA-KK-A7AV-01	PRIMARY	BLACK	NA	58	NA	7	7	Poly(A+)	PROSTATE	Bilateral	Peripheral Zone	Apex|Middle|Base	NEGATIVE	N0	T2c	T1c	NO	NA	not_fused	not_fused	not_fused	not_fused
	461	TCGA	TCGA-M7-A723-01	TCGA-M7-A723-01	PRIMARY	WHITE	NA	54	NA	7	7	Poly(A+)	PROSTATE	Bilateral	Overlapping	Apex|Middle|Base	POSITIVE	N1	T3b	T1c	NO	NA	not_fused	not_fused	not_fused	not_fused
	462	TCGA	TCGA-KC-A4BR-01	TCGA-KC-A4BR-01	PRIMARY	WHITE	NA	75	NA	9	9	Poly(A+)	PROSTATE	Bilateral	Peripheral Zone	Apex|Middle|Base	POSITIVE	N1	T3b	T2	YES	1022	fused	not_fused	not_fused	not_fused
	463	TCGA	TCGA-KC-A7F3-01	TCGA-KC-A7F3-01	PRIMARY	WHITE	NA	67	NA	7	7	Poly(A+)	PROSTATE	Bilateral	Peripheral Zone	Apex	NEGATIVE	N0	T2c	T1c	NO	NA	not_fused	not_fused	not_fused	not_fused
	464	TCGA	TCGA-EJ-A6RA-01	TCGA-EJ-A6RA-01	PRIMARY	WHITE	NA	70	NA	8	8	Poly(A+)	PROSTATE	Bilateral	NA	NA	POSITIVE	N1	T3b	T3b	YES	353	not_fused	not_fused	not_fused	not_fused
	465	TCGA	TCGA-KK-A7AY-01	TCGA-KK-A7AY-01	PRIMARY	WHITE	NA	60	NA	7	7	Poly(A+)	PROSTATE	Bilateral	Peripheral Zone	Apex|Middle|Base	NEGATIVE	N0	T2c	T2a	YES	1124	not_fused	not_fused	not_fused	not_fused
	466	TCGA	TCGA-EJ-A7NM-01	TCGA-EJ-A7NM-01	PRIMARY	WHITE	NA	64	NA	9	9	Poly(A+)	PROSTATE	Bilateral	NA	NA	POSITIVE	N1	T3b	T3b	NO	NA	not_fused	not_fused	not_fused	not_fused
	467	TCGA	TCGA-KC-A7FA-01	TCGA-KC-A7FA-01	PRIMARY	WHITE	NA	63	NA	7	7	Poly(A+)	PROSTATE	Bilateral	Peripheral Zone	Apex|Middle|Base	NEGATIVE	N0	T3a	T2c	NO	NA	not_fused	not_fused	not_fused	not_fused
	468	TCGA	TCGA-HC-A76W-01	TCGA-HC-A76W-01	PRIMARY	WHITE	NA	73	NA	7	7	Poly(A+)	PROSTATE	Bilateral	NA	Apex|Middle|Base	NEGATIVE	N0	T3b	T2	NO	NA	not_fused	not_fused	not_fused	not_fused
	469	TCGA	TCGA-EJ-A7NF-01	TCGA-EJ-A7NF-01	PRIMARY	WHITE	NA	56	NA	7	7	Poly(A+)	PROSTATE	Bilateral	NA	NA	NEGATIVE	N0	T2c	T2c	NO	NA	fused	not_fused	not_fused	not_fused
	470	TCGA	TCGA-EJ-A7NG-01	TCGA-EJ-A7NG-01	PRIMARY	WHITE	NA	64	NA	7	7	Poly(A+)	PROSTATE	Bilateral	NA	NA	NEGATIVE	N0	T3a	T3a	NO	NA	not_fused	not_fused	not_fused	not_fused
	471	TCGA	TCGA-EJ-A7NN-01	TCGA-EJ-A7NN-01	PRIMARY	WHITE	NA	61	NA	7	7	Poly(A+)	PROSTATE	Bilateral	NA	NA	POSITIVE	N1	T3b	T3b	YES	197	not_fused	not_fused	not_fused	not_fused
	472	TCGA	TCGA-EJ-A7NH-01	TCGA-EJ-A7NH-01	PRIMARY	WHITE	NA	56	NA	7	7	Poly(A+)	PROSTATE	Bilateral	NA	NA	NEGATIVE	N0	T2c	T2c	NO	NA	not_fused	not_fused	not_fused	not_fused
	473	TCGA	TCGA-HC-A76X-01	TCGA-HC-A76X-01	PRIMARY	WHITE	NA	62	NA	7	7	Poly(A+)	PROSTATE	Bilateral	NA	Apex|Middle|Base	NEGATIVE	N0	T2c	T1c	NO	NA	fused	not_fused	not_fused	not_fused
	474	TCGA	TCGA-KC-A7F6-01	TCGA-KC-A7F6-01	PRIMARY	WHITE	NA	63	NA	7	7	Poly(A+)	PROSTATE	Bilateral	Peripheral Zone	Apex|Middle	NEGATIVE	N0	T2c	T1c	NO	NA	fused	not_fused	not_fused	not_fused
	475	TCGA	TCGA-KC-A7F5-01	TCGA-KC-A7F5-01	PRIMARY	WHITE	NA	54	NA	7	7	Poly(A+)	PROSTATE	Right	Peripheral Zone	Apex|Middle|Base	NEGATIVE	N0	T2c	T2c	NO	NA	not_fused	not_fused	not_fused	not_fused
	476	TCGA	TCGA-KK-A7B3-01	TCGA-KK-A7B3-01	PRIMARY	WHITE	NA	62	NA	9	9	Poly(A+)	PROSTATE	Bilateral	Peripheral Zone	Apex|Middle|Base	NEGATIVE	N0	T3b	T3a	NO	NA	not_fused	not_fused	not_fused	not_fused
	477	TCGA	TCGA-KK-A7AQ-01	TCGA-KK-A7AQ-01	PRIMARY	WHITE	NA	62	NA	7	7	Poly(A+)	PROSTATE	Bilateral	Peripheral Zone	Apex|Middle	NEGATIVE	N0	T2c	T2a	YES	1217	not_fused	not_fused	not_fused	not_fused
	478	TCGA	TCGA-SU-A7E7-01	TCGA-SU-A7E7-01	PRIMARY	WHITE	NA	60	NA	8	8	Poly(A+)	PROSTATE	Right	Peripheral Zone	Base	NEGATIVE	N0	T2b	T2b	NO	NA	not_fused	fused	not_fused	not_fused
	479	TCGA	TCGA-KC-A7FD-01	TCGA-KC-A7FD-01	PRIMARY	WHITE	NA	62	NA	7	7	Poly(A+)	PROSTATE	Bilateral	Peripheral Zone	Apex|Middle|Base	NEGATIVE	N0	T3a	T1c	NO	NA	not_fused	not_fused	not_fused	fused
	480	TCGA	TCGA-KK-A7AP-01	TCGA-KK-A7AP-01	PRIMARY	WHITE	NA	55	NA	9	9	Poly(A+)	PROSTATE	Right	Overlapping	Apex|Middle|Base	POSITIVE	N1	T3b	T2b	NO	NA	not_fused	fused	not_fused	not_fused
	481	TCGA	TCGA-KC-A7FE-01	TCGA-KC-A7FE-01	PRIMARY	WHITE	NA	62	NA	7	7	Poly(A+)	PROSTATE	Bilateral	Peripheral Zone	Apex|Middle	NEGATIVE	N0	T2c	T1c	NO	NA	not_fused	not_fused	not_fused	not_fused
	482	TCGA	TCGA-J9-A8CK-01	TCGA-J9-A8CK-01	PRIMARY	WHITE	NA	66	NA	9	9	Poly(A+)	PROSTATE	Bilateral	Overlapping	Apex|Middle|Base	NA	NA	T3a	T3a	NO	NA	fused	not_fused	not_fused	not_fused
	483	TCGA	TCGA-J9-A8CM-01	TCGA-J9-A8CM-01	PRIMARY	WHITE	NA	66	NA	9	9	Poly(A+)	PROSTATE	Bilateral	Peripheral Zone	Apex|Middle|Base	POSITIVE	N1	T3b	T2c	YES	344	fused	not_fused	not_fused	not_fused
	484	TCGA	TCGA-EJ-A7NK-01	TCGA-EJ-A7NK-01	PRIMARY	WHITE	NA	58	NA	7	7	Poly(A+)	PROSTATE	Bilateral	NA	NA	NEGATIVE	N0	T3a	T3a	NO	NA	fused	not_fused	not_fused	not_fused
	485	TCGA	TCGA-J9-A8CL-01	TCGA-J9-A8CL-01	PRIMARY	WHITE	NA	66	NA	9	9	Poly(A+)	PROSTATE	Bilateral	Overlapping	Apex|Middle|Base	NA	NA	T3b	T3a	YES	132	not_fused	not_fused	not_fused	not_fused
	486	TCGA	TCGA-EJ-A7NJ-01	TCGA-EJ-A7NJ-01	PRIMARY	WHITE	NA	59	NA	8	8	Poly(A+)	PROSTATE	Bilateral	NA	NA	NEGATIVE	N0	T2c	T2c	NO	NA	not_fused	not_fused	not_fused	not_fused
	487	TCGA	TCGA-EJ-A8FN-01	TCGA-EJ-A8FN-01	PRIMARY	WHITE	NA	58	NA	7	7	Poly(A+)	PROSTATE	Bilateral	NA	NA	NEGATIVE	N0	T2c	T2c	NO	NA	not_fused	not_fused	not_fused	not_fused
	488	TCGA	TCGA-VN-A88L-01	TCGA-VN-A88L-01	PRIMARY	WHITE	NA	54	NA	7	7	Poly(A+)	PROSTATE	Bilateral	NA	Middle|Base	NEGATIVE	N0	T2c	T1c	NO	NA	fused	not_fused	not_fused	not_fused
	489	TCGA	TCGA-VP-A87K-01	TCGA-VP-A87K-01	PRIMARY	WHITE	NA	63	NA	8	8	Poly(A+)	PROSTATE	Bilateral	Overlapping	Apex|Base	NEGATIVE	N0	T3b	T1c	YES	473	fused	not_fused	not_fused	not_fused
	490	TCGA	TCGA-VP-A878-01	TCGA-VP-A878-01	PRIMARY	WHITE	NA	58	NA	9	9	Poly(A+)	PROSTATE	Bilateral	Overlapping	Apex|Base	POSITIVE	N1	T2c	T1c	YES	98	not_fused	not_fused	not_fused	not_fused
	491	TCGA	TCGA-VN-A88M-01	TCGA-VN-A88M-01	PRIMARY	BLACK	NA	55	NA	7	7	Poly(A+)	PROSTATE	Bilateral	NA	Middle	NEGATIVE	N0	T2c	T1c	NO	NA	fused	not_fused	not_fused	not_fused
	492	TCGA	TCGA-VN-A88O-01	TCGA-VN-A88O-01	PRIMARY	NA	NA	49	NA	7	7	Poly(A+)	PROSTATE	Bilateral	Overlapping	Apex|Middle|Base	NEGATIVE	N0	T2c	T1c	NO	NA	not_fused	not_fused	not_fused	not_fused
	493	TCGA	TCGA-VP-A879-01	TCGA-VP-A879-01	PRIMARY	WHITE	NA	70	NA	9	9	Poly(A+)	PROSTATE	Right	Overlapping	Apex|Base	NEGATIVE	N0	T2b	T1c	NO	NA	fused	not_fused	not_fused	not_fused
	494	TCGA	TCGA-VP-A87B-01	TCGA-VP-A87B-01	PRIMARY	WHITE	NA	63	NA	8	8	Poly(A+)	PROSTATE	Right	Overlapping	Apex|Base	NEGATIVE	N0	T2b	T1c	NO	NA	not_fused	not_fused	not_fused	not_fused
	495	TCGA	TCGA-J9-A8CN-01	TCGA-J9-A8CN-01	PRIMARY	WHITE	NA	53	NA	6	6	Poly(A+)	PROSTATE	Bilateral	Transition Zone	Apex|Middle	NA	NA	T3a	T1c	NO	NA	not_fused	not_fused	not_fused	not_fused
	496	TCGA	TCGA-J4-A83M-01	TCGA-J4-A83M-01	PRIMARY	WHITE	NA	64	NA	7	7	Poly(A+)	PROSTATE	Bilateral	Peripheral Zone	Apex|Middle	NEGATIVE	N0	T2c	T2c	NO	NA	not_fused	fused	not_fused	not_fused
	497	TCGA	TCGA-J4-A83K-01	TCGA-J4-A83K-01	PRIMARY	WHITE	NA	52	NA	6	6	Poly(A+)	PROSTATE	Bilateral	Peripheral Zone	Apex|Middle|Base	NA	NA	T2c	T1c	NO	NA	fused	not_fused	not_fused	not_fused
	498	TCGA	TCGA-VP-A875-01	TCGA-VP-A875-01	PRIMARY	BLACK	NA	67	NA	7	7	Poly(A+)	PROSTATE	Bilateral	Overlapping	Apex|Base	NEGATIVE	N0	T3a	T2a	NO	NA	fused	not_fused	not_fused	not_fused
	499	TCGA	TCGA-J9-A8CP-01	TCGA-J9-A8CP-01	PRIMARY	WHITE	NA	66	NA	7	7	Poly(A+)	PROSTATE	Bilateral	Overlapping	Apex|Middle	NA	NA	T3a	T2a	NO	NA	not_fused	not_fused	not_fused	not_fused
	500	TCGA	TCGA-VN-A88P-01	TCGA-VN-A88P-01	PRIMARY	WHITE	NA	60	NA	7	7	Poly(A+)	PROSTATE	Bilateral	Overlapping	Base	NEGATIVE	N0	T2c	T1c	NO	NA	not_fused	not_fused	not_fused	not_fused
	501	TCGA	TCGA-J4-A83N-01	TCGA-J4-A83N-01	PRIMARY	WHITE	NA	57	NA	7	7	Poly(A+)	PROSTATE	Bilateral	Overlapping	Apex|Middle|Base	NA	NA	T2c	T1c	NO	NA	fused	not_fused	not_fused	not_fused
	502	TCGA	TCGA-J4-A83L-01	TCGA-J4-A83L-01	PRIMARY	WHITE	NA	61	NA	7	7	Poly(A+)	PROSTATE	Bilateral	Central Zone	Apex|Middle|Base	NEGATIVE	N0	T2c	T1c	NO	NA	not_fused	not_fused	not_fused	not_fused
	503	TCGA	TCGA-VN-A88I-01	TCGA-VN-A88I-01	PRIMARY	WHITE	NA	59	NA	8	8	Poly(A+)	PROSTATE	Bilateral	Overlapping	Apex|Middle|Base	NEGATIVE	N0	T3a	T1c	NO	NA	not_fused	not_fused	not_fused	not_fused
	504	TCGA	TCGA-VP-A87C-01	TCGA-VP-A87C-01	PRIMARY	BLACK	NA	67	NA	7	7	Poly(A+)	PROSTATE	Bilateral	Overlapping	Apex|Base	NEGATIVE	N0	T2c	T1c	NO	NA	fused	not_fused	not_fused	not_fused
	505	TCGA	TCGA-VP-A872-01	TCGA-VP-A872-01	PRIMARY	WHITE	NA	60	NA	8	8	Poly(A+)	PROSTATE	Bilateral	Overlapping	Apex|Base	NEGATIVE	N0	T3a	T2	NO	NA	fused	not_fused	not_fused	not_fused
	506	TCGA	TCGA-VN-A88Q-01	TCGA-VN-A88Q-01	PRIMARY	WHITE	NA	60	NA	8	8	Poly(A+)	PROSTATE	Bilateral	Overlapping	Apex	NEGATIVE	N0	T2c	T2a	NO	NA	fused	not_fused	not_fused	not_fused
	507	TCGA	TCGA-VN-A88K-01	TCGA-VN-A88K-01	PRIMARY	WHITE	NA	58	NA	8	8	Poly(A+)	PROSTATE	Bilateral	Overlapping	Apex|Middle|Base	POSITIVE	N1	T3a	T1c	NO	NA	fused	not_fused	not_fused	not_fused
	508	TCGA	TCGA-KK-A8IJ-01	TCGA-KK-A8IJ-01	PRIMARY	WHITE	NA	59	NA	7	7	Poly(A+)	PROSTATE	Bilateral	Peripheral Zone	Apex|Middle|Base	POSITIVE	N1	T3b	T3a	NO	NA	not_fused	not_fused	not_fused	not_fused
	509	TCGA	TCGA-XJ-A83G-01	TCGA-XJ-A83G-01	PRIMARY	BLACK	NA	51	NA	7	7	Poly(A+)	PROSTATE	Bilateral	Peripheral Zone	Apex|Middle	NEGATIVE	N0	T3b	T1c	NO	NA	not_fused	not_fused	not_fused	not_fused
	510	TCGA	TCGA-XJ-A83F-01	TCGA-XJ-A83F-01	PRIMARY	WHITE	NA	67	NA	7	7	Poly(A+)	PROSTATE	Right	Peripheral Zone	Middle|Base	NEGATIVE	N0	T3a	NA	NO	NA	fused	not_fused	not_fused	not_fused
	511	TCGA	TCGA-EJ-A8FS-01	TCGA-EJ-A8FS-01	PRIMARY	WHITE	NA	66	NA	7	7	Poly(A+)	PROSTATE	Bilateral	NA	NA	NEGATIVE	N0	T3a	T3a	YES	216	not_fused	not_fused	not_fused	not_fused
	512	TCGA	TCGA-VP-A87E-01	TCGA-VP-A87E-01	PRIMARY	BLACK	NA	59	NA	6	6	Poly(A+)	PROSTATE	Bilateral	Overlapping	Apex|Base	NEGATIVE	N0	T2c	T1c	NO	NA	not_fused	not_fused	not_fused	not_fused
	513	TCGA	TCGA-XJ-A83H-01	TCGA-XJ-A83H-01	PRIMARY	WHITE	NA	57	NA	7	7	Poly(A+)	PROSTATE	Bilateral	Peripheral Zone	Middle|Base	NA	NA	T2c	T2a	NO	NA	not_fused	not_fused	not_fused	not_fused
	514	TCGA	TCGA-KK-A8I4-01	TCGA-KK-A8I4-01	PRIMARY	WHITE	NA	64	NA	7	7	Poly(A+)	PROSTATE	Left	Peripheral Zone	Apex|Middle|Base	POSITIVE	N1	T3b	T2c	YES	1155	fused	not_fused	not_fused	not_fused
	515	TCGA	TCGA-EJ-A8FO-01	TCGA-EJ-A8FO-01	PRIMARY	NA	NA	51	NA	7	7	Poly(A+)	PROSTATE	Bilateral	NA	NA	NEGATIVE	N0	T3a	T3a	NO	NA	fused	not_fused	not_fused	not_fused
	516	TCGA	TCGA-VP-A87D-01	TCGA-VP-A87D-01	PRIMARY	WHITE	NA	54	NA	9	9	Poly(A+)	PROSTATE	Bilateral	Overlapping	Apex|Base	POSITIVE	N1	T3a	T1c	YES	1194	fused	not_fused	not_fused	not_fused
	517	TCGA	TCGA-HC-A8D0-01	TCGA-HC-A8D0-01	PRIMARY	WHITE	NA	61	NA	7	7	Poly(A+)	PROSTATE	Left	Overlapping	Apex|Middle	NEGATIVE	N0	T2a	T1c	NO	NA	fused	not_fused	not_fused	not_fused
	518	TCGA	TCGA-HC-A8D1-01	TCGA-HC-A8D1-01	PRIMARY	WHITE	NA	68	NA	7	7	Poly(A+)	PROSTATE	Bilateral	NA	NA	NEGATIVE	N0	T2c	T2	NO	NA	fused	not_fused	not_fused	not_fused
	519	TCGA	TCGA-VP-A87H-01	TCGA-VP-A87H-01	PRIMARY	WHITE	NA	76	NA	9	9	Poly(A+)	PROSTATE	Bilateral	Overlapping	Apex|Base	NEGATIVE	N0	T3b	T2	NO	NA	not_fused	not_fused	not_fused	not_fused
	520	TCGA	TCGA-J4-A83I-01	TCGA-J4-A83I-01	PRIMARY	WHITE	NA	63	NA	7	7	Poly(A+)	PROSTATE	Bilateral	Peripheral Zone	Apex|Middle|Base	NEGATIVE	N0	T3a	T1c	NO	NA	fused	not_fused	not_fused	not_fused
	521	TCGA	TCGA-EJ-A8FP-01	TCGA-EJ-A8FP-01	PRIMARY	WHITE	NA	59	NA	8	8	Poly(A+)	PROSTATE	Bilateral	NA	NA	NEGATIVE	N0	T2c	T2c	YES	117	not_fused	not_fused	not_fused	not_fused
	522	TCGA	TCGA-J4-A83J-01	TCGA-J4-A83J-01	PRIMARY	WHITE	NA	68	NA	7	7	Poly(A+)	PROSTATE	Bilateral	Peripheral Zone	Apex|Middle|Base	NEGATIVE	N0	T2c	T1c	NO	NA	fused	not_fused	not_fused	not_fused
	523	TCGA	TCGA-KK-A8I7-01	TCGA-KK-A8I7-01	PRIMARY	WHITE	NA	55	NA	9	9	Poly(A+)	PROSTATE	Bilateral	Peripheral Zone	Apex|Middle|Base	NEGATIVE	N0	T3b	T2c	YES	1088	not_fused	not_fused	not_fused	not_fused
	524	TCGA	TCGA-KK-A8IG-01	TCGA-KK-A8IG-01	PRIMARY	WHITE	NA	55	NA	7	7	Poly(A+)	PROSTATE	Bilateral	Transition Zone	Apex|Middle	NEGATIVE	N0	T3a	T2a	NO	NA	not_fused	not_fused	not_fused	not_fused
	525	TCGA	TCGA-KK-A8IH-01	TCGA-KK-A8IH-01	PRIMARY	WHITE	NA	50	NA	7	7	Poly(A+)	PROSTATE	Bilateral	Peripheral Zone	Apex|Middle|Base	NEGATIVE	N0	T3a	T2b	NO	NA	fused	not_fused	not_fused	not_fused
	526	TCGA	TCGA-V1-A8MJ-01	TCGA-V1-A8MJ-01	PRIMARY	BLACK	NA	58	NA	7	7	Poly(A+)	PROSTATE	Bilateral	Peripheral Zone	Apex	POSITIVE	N1	T3a	T2a	NO	NA	fused	not_fused	not_fused	not_fused
	527	TCGA	TCGA-VP-A876-01	TCGA-VP-A876-01	PRIMARY	WHITE	NA	46	NA	8	8	Poly(A+)	PROSTATE	Bilateral	Overlapping	Apex|Base	NEGATIVE	N0	T2c	T1c	NO	NA	fused	not_fused	not_fused	not_fused
	528	TCGA	TCGA-V1-A8MF-01	TCGA-V1-A8MF-01	PRIMARY	BLACK	NA	65	NA	6	6	Poly(A+)	PROSTATE	Bilateral	Peripheral Zone	Apex	NEGATIVE	N0	T3a	T2c	NO	NA	not_fused	not_fused	not_fused	not_fused
	529	TCGA	TCGA-V1-A8MG-01	TCGA-V1-A8MG-01	PRIMARY	BLACK	NA	53	NA	7	7	Poly(A+)	PROSTATE	Bilateral	Peripheral Zone	Apex	NA	NA	T3b	T2c	NO	NA	not_fused	not_fused	not_fused	not_fused
	530	TCGA	TCGA-KK-A8IC-01	TCGA-KK-A8IC-01	PRIMARY	WHITE	NA	54	NA	9	9	Poly(A+)	PROSTATE	Bilateral	Peripheral Zone	Apex|Middle|Base	NEGATIVE	N0	T3b	T1c	YES	1060	fused	not_fused	not_fused	not_fused
	531	TCGA	TCGA-KK-A8IA-01	TCGA-KK-A8IA-01	PRIMARY	WHITE	NA	69	NA	9	9	Poly(A+)	PROSTATE	Bilateral	Peripheral Zone	Apex|Middle|Base	POSITIVE	N1	T3b	T3b	NO	NA	fused	not_fused	not_fused	not_fused
	532	TCGA	TCGA-KK-A8IL-01	TCGA-KK-A8IL-01	PRIMARY	WHITE	NA	65	NA	9	9	Poly(A+)	PROSTATE	Bilateral	Peripheral Zone	Apex|Middle|Base	POSITIVE	N1	T3b	T1c	NO	NA	not_fused	not_fused	not_fused	not_fused
	533	TCGA	TCGA-XA-A8JR-01	TCGA-XA-A8JR-01	PRIMARY	NA	NA	68	NA	7	7	Poly(A+)	PROSTATE	Bilateral	NA	NA	NEGATIVE	N0	T2c	NA	NO	NA	not_fused	not_fused	not_fused	not_fused
	534	TCGA	TCGA-KK-A8II-01	TCGA-KK-A8II-01	PRIMARY	WHITE	NA	61	NA	9	9	Poly(A+)	PROSTATE	Bilateral	Peripheral Zone	Apex|Middle|Base	NEGATIVE	N0	T3a	T2c	YES	626	fused	not_fused	not_fused	not_fused
	535	TCGA	TCGA-V1-A8MK-01	TCGA-V1-A8MK-01	PRIMARY	BLACK	NA	41	NA	6	6	Poly(A+)	PROSTATE	Bilateral	Peripheral Zone	Apex	NEGATIVE	N0	T2c	T2a	NO	NA	fused	not_fused	not_fused	not_fused
	536	TCGA	TCGA-KK-A8IB-01	TCGA-KK-A8IB-01	PRIMARY	WHITE	NA	65	NA	9	9	Poly(A+)	PROSTATE	Bilateral	Peripheral Zone	Apex|Middle|Base	NEGATIVE	N0	T3a	T2a	NO	NA	not_fused	not_fused	not_fused	not_fused
	537	TCGA	TCGA-KK-A8IM-01	TCGA-KK-A8IM-01	PRIMARY	WHITE	NA	55	NA	7	7	Poly(A+)	PROSTATE	Bilateral	Peripheral Zone	Apex|Middle|Base	NEGATIVE	N0	T2c	T2a	NO	NA	fused	not_fused	not_fused	not_fused
	538	TCGA	TCGA-KK-A8I9-01	TCGA-KK-A8I9-01	PRIMARY	NA	NA	61	NA	8	8	Poly(A+)	PROSTATE	Bilateral	Peripheral Zone	Apex|Middle|Base	NEGATIVE	N0	T3a	T2b	NO	NA	not_fused	not_fused	not_fused	not_fused
	539	TCGA	TCGA-KK-A8IK-01	TCGA-KK-A8IK-01	PRIMARY	WHITE	NA	56	NA	9	9	Poly(A+)	PROSTATE	Bilateral	Peripheral Zone	Apex|Middle|Base	NEGATIVE	N0	T2c	T1c	NO	NA	not_fused	not_fused	not_fused	not_fused
	540	TCGA	TCGA-VN-A88N-01	TCGA-VN-A88N-01	PRIMARY	WHITE	NA	62	NA	7	7	Poly(A+)	PROSTATE	Bilateral	Overlapping	Apex|Middle|Base	NEGATIVE	N0	T2c	T1c	NO	NA	not_fused	not_fused	not_fused	not_fused
	541	TCGA	TCGA-KK-A8I8-01	TCGA-KK-A8I8-01	PRIMARY	WHITE	NA	69	NA	9	9	Poly(A+)	PROSTATE	Bilateral	Peripheral Zone	Apex|Middle|Base	NEGATIVE	N0	T3b	T2a	NO	NA	fused	not_fused	not_fused	not_fused
	542	TCGA	TCGA-VP-A87J-01	TCGA-VP-A87J-01	PRIMARY	BLACK	NA	56	NA	7	7	Poly(A+)	PROSTATE	Bilateral	Overlapping	Apex|Base	POSITIVE	N1	T3a	T2a	NO	NA	not_fused	not_fused	not_fused	not_fused
	543	TCGA	TCGA-HC-A8CY-01	TCGA-HC-A8CY-01	PRIMARY	WHITE	NA	63	NA	9	9	Poly(A+)	PROSTATE	Bilateral	Overlapping	NA	POSITIVE	N1	T3a	T1c	NO	NA	not_fused	fused	not_fused	not_fused
	544	TCGA	TCGA-YL-A8HJ-01	TCGA-YL-A8HJ-01	PRIMARY	WHITE	NA	58	NA	9	9	Poly(A+)	PROSTATE	Bilateral	Overlapping	Apex|Middle|Base	NA	NA	T3b	NA	NO	NA	fused	not_fused	not_fused	not_fused
	545	TCGA	TCGA-KK-A8ID-01	TCGA-KK-A8ID-01	PRIMARY	NA	NA	70	NA	9	9	Poly(A+)	PROSTATE	Bilateral	Overlapping	Apex|Middle|Base	POSITIVE	N1	T3b	T2b	NO	NA	not_fused	not_fused	not_fused	not_fused
	546	TCGA	TCGA-EJ-A8FU-01	TCGA-EJ-A8FU-01	PRIMARY	WHITE	NA	64	NA	8	8	Poly(A+)	PROSTATE	Bilateral	NA	NA	NEGATIVE	N0	T3a	T3a	NO	NA	not_fused	not_fused	not_fused	not_fused
	547	TCGA	TCGA-KK-A8I6-01	TCGA-KK-A8I6-01	PRIMARY	WHITE	NA	58	NA	7	7	Poly(A+)	PROSTATE	Bilateral	Peripheral Zone	Apex|Middle|Base	NEGATIVE	N0	T3a	T2b	NO	NA	fused	not_fused	not_fused	not_fused
	548	TCGA	TCGA-XQ-A8TB-01	TCGA-XQ-A8TB-01	PRIMARY	WHITE	NA	67	NA	9	9	Poly(A+)	PROSTATE	Bilateral	Peripheral Zone	Apex|Middle|Base	NEGATIVE	N0	T3b	T2a	NO	NA	fused	not_fused	not_fused	not_fused
	549	TCGA	TCGA-XQ-A8TA-01	TCGA-XQ-A8TA-01	PRIMARY	WHITE	NA	59	NA	10	10	Poly(A+)	PROSTATE	Bilateral	Peripheral Zone	NA	NA	NA	NA	T3a	NO	NA	not_fused	not_fused	not_fused	not_fused
	550	TCGA	TCGA-KK-A8I5-01	TCGA-KK-A8I5-01	PRIMARY	BLACK	NA	55	NA	7	7	Poly(A+)	PROSTATE	Right	Peripheral Zone	Apex|Middle|Base	NEGATIVE	N0	T2b	T2a	NO	NA	fused	not_fused	not_fused	not_fused
	551	TCGA	TCGA-YL-A8HK-01	TCGA-YL-A8HK-01	PRIMARY	WHITE	NA	59	NA	9	9	Poly(A+)	PROSTATE	Bilateral	Overlapping	Apex|Middle|Base	NEGATIVE	N0	T3b	NA	YES	1376	fused	not_fused	not_fused	not_fused
	552	TCGA	TCGA-TK-A8OK-01	TCGA-TK-A8OK-01	PRIMARY	WHITE	NA	73	NA	7	7	Poly(A+)	PROSTATE	Right	Overlapping	NA	NA	NA	NA	NA	NO	NA	not_fused	not_fused	not_fused	not_fused
	553	TCGA	TCGA-KK-A8IF-01	TCGA-KK-A8IF-01	PRIMARY	BLACK	NA	57	NA	7	7	Poly(A+)	PROSTATE	Bilateral	Transition Zone	Apex|Middle|Base	NEGATIVE	N0	T3a	T2a	YES	648	not_fused	not_fused	not_fused	not_fused
	554	TCGA	TCGA-VN-A88R-01	TCGA-VN-A88R-01	PRIMARY	BLACK	NA	53	NA	8	8	Poly(A+)	PROSTATE	Bilateral	NA	Apex|Middle|Base	NEGATIVE	N0	T2c	T1c	NO	NA	not_fused	not_fused	not_fused	not_fused
	555	TCGA	TCGA-YL-A8HM-01	TCGA-YL-A8HM-01	PRIMARY	WHITE	NA	66	NA	9	9	Poly(A+)	PROSTATE	Bilateral	Overlapping	Apex|Middle|Base	NEGATIVE	N0	T3b	NA	NO	NA	not_fused	not_fused	not_fused	not_fused
	556	TCGA	TCGA-X4-A8KQ-01	TCGA-X4-A8KQ-01	PRIMARY	WHITE	NA	65	NA	9	9	Poly(A+)	PROSTATE	Right	Peripheral Zone	NA	NEGATIVE	N0	T3b	T1c	NO	NA	fused	not_fused	not_fused	not_fused
	557	TCGA	TCGA-YL-A8HO-01	TCGA-YL-A8HO-01	PRIMARY	BLACK	NA	67	NA	7	7	Poly(A+)	PROSTATE	Bilateral	Overlapping	Middle|Base	NEGATIVE	N0	T3a	NA	YES	1068	not_fused	not_fused	not_fused	not_fused
	558	TCGA	TCGA-YL-A8HL-01	TCGA-YL-A8HL-01	PRIMARY	WHITE	NA	58	NA	9	9	Poly(A+)	PROSTATE	Bilateral	Overlapping	Apex|Middle|Base	POSITIVE	N1	T3b	NA	NO	NA	fused	not_fused	not_fused	not_fused
	559	TCGA	TCGA-V1-A8WV-01	TCGA-V1-A8WV-01	PRIMARY	WHITE	NA	52	NA	9	9	Poly(A+)	PROSTATE	Bilateral	Peripheral Zone	Middle	POSITIVE	N1	T3b	T2a	NO	NA	not_fused	not_fused	not_fused	not_fused
	560	TCGA	TCGA-2A-A8W3-01	TCGA-2A-A8W3-01	PRIMARY	WHITE	NA	69	NA	9	9	Poly(A+)	PROSTATE	Left	Peripheral Zone	Apex|Middle|Base	NEGATIVE	N0	T3a	T2b	YES	198	not_fused	fused	not_fused	not_fused
	561	TCGA	TCGA-FC-A8O0-01	TCGA-FC-A8O0-01	PRIMARY	WHITE	NA	68	NA	6	6	Poly(A+)	PROSTATE	Bilateral	Peripheral Zone	Base	NEGATIVE	N0	T3a	T2c	NO	NA	not_fused	not_fused	not_fused	not_fused
	562	TCGA	TCGA-2A-A8VO-01	TCGA-2A-A8VO-01	PRIMARY	WHITE	NA	57	NA	6	6	Poly(A+)	PROSTATE	Bilateral	Overlapping	Apex|Middle|Base	NA	NA	T3a	T1c	NO	NA	not_fused	not_fused	not_fused	not_fused
	563	TCGA	TCGA-2A-A8VT-01	TCGA-2A-A8VT-01	PRIMARY	ASIAN	NA	47	NA	9	9	Poly(A+)	PROSTATE	Bilateral	Overlapping	Apex|Middle|Base	POSITIVE	N1	T4	T2c	NO	NA	fused	not_fused	not_fused	not_fused
	564	TCGA	TCGA-Y6-A8TL-01	TCGA-Y6-A8TL-01	PRIMARY	NA	NA	65	NA	6	6	Poly(A+)	PROSTATE	Right	Peripheral Zone	Apex	NEGATIVE	N0	T3a	T2a	NO	NA	not_fused	not_fused	not_fused	not_fused
	565	TCGA	TCGA-2A-A8VL-01	TCGA-2A-A8VL-01	PRIMARY	WHITE	NA	51	NA	6	6	Poly(A+)	PROSTATE	Left	Peripheral Zone	Middle|Base	NEGATIVE	N0	T2b	NA	NO	NA	fused	not_fused	not_fused	not_fused
	566	TCGA	TCGA-YL-A8SH-01	TCGA-YL-A8SH-01	PRIMARY	WHITE	NA	69	NA	7	7	Poly(A+)	PROSTATE	Bilateral	Overlapping	Apex|Middle|Base	NEGATIVE	N0	T3a	NA	NO	NA	not_fused	not_fused	not_fused	not_fused
	567	TCGA	TCGA-YL-A8S8-01	TCGA-YL-A8S8-01	PRIMARY	WHITE	NA	68	NA	9	9	Poly(A+)	PROSTATE	Bilateral	Overlapping	Apex|Middle|Base	NEGATIVE	N0	T3a	NA	YES	679	not_fused	not_fused	not_fused	not_fused
	568	TCGA	TCGA-V1-A8WW-01	TCGA-V1-A8WW-01	PRIMARY	WHITE	NA	59	NA	9	9	Poly(A+)	PROSTATE	Bilateral	Peripheral Zone	Apex	POSITIVE	N1	T3b	T2b	YES	105	fused	not_fused	not_fused	not_fused
	569	TCGA	TCGA-V1-A8MM-01	TCGA-V1-A8MM-01	PRIMARY	BLACK	NA	60	NA	7	7	Poly(A+)	PROSTATE	Bilateral	Peripheral Zone	Apex	NEGATIVE	N0	T3a	T2b	YES	990	not_fused	not_fused	not_fused	not_fused
	570	TCGA	TCGA-V1-A8X3-01	TCGA-V1-A8X3-01	PRIMARY	WHITE	NA	51	NA	7	7	Poly(A+)	PROSTATE	Bilateral	Peripheral Zone	Apex	NEGATIVE	N0	T2c	T1c	NO	NA	not_fused	not_fused	not_fused	not_fused
	571	TCGA	TCGA-V1-A8MU-01	TCGA-V1-A8MU-01	PRIMARY	BLACK	NA	56	NA	7	7	Poly(A+)	PROSTATE	Bilateral	Peripheral Zone	Apex	POSITIVE	N1	T3a	T2b	NO	NA	not_fused	not_fused	not_fused	not_fused
	572	TCGA	TCGA-YL-A8S9-01	TCGA-YL-A8S9-01	PRIMARY	WHITE	NA	63	NA	9	9	Poly(A+)	PROSTATE	Bilateral	Overlapping	Apex|Middle	NEGATIVE	N0	T3a	NA	NO	NA	not_fused	not_fused	not_fused	not_fused
	573	TCGA	TCGA-XJ-A9DI-01	TCGA-XJ-A9DI-01	PRIMARY	WHITE	NA	62	NA	9	9	Poly(A+)	PROSTATE	NA	Peripheral Zone	Base	NEGATIVE	N0	T3b	T2b	NO	NA	fused	not_fused	not_fused	not_fused
	574	TCGA	TCGA-V1-A8ML-01	TCGA-V1-A8ML-01	PRIMARY	BLACK	NA	63	NA	7	7	Poly(A+)	PROSTATE	Bilateral	Peripheral Zone	Apex	NEGATIVE	N0	T2c	T2b	NO	NA	not_fused	not_fused	not_fused	not_fused
	575	TCGA	TCGA-YJ-A8SW-01	TCGA-YJ-A8SW-01	PRIMARY	NA	NA	67	NA	9	9	Poly(A+)	PROSTATE	Right	NA	NA	NEGATIVE	N0	T3b	T1c	YES	148	not_fused	not_fused	not_fused	not_fused
	576	TCGA	TCGA-WW-A8ZI-01	TCGA-WW-A8ZI-01	PRIMARY	WHITE	NA	70	NA	8	8	Poly(A+)	PROSTATE	Bilateral	NA	Apex	NEGATIVE	N0	T2c	T2c	NO	NA	not_fused	not_fused	not_fused	not_fused
	577	TCGA	TCGA-YL-A9WH-01	TCGA-YL-A9WH-01	PRIMARY	WHITE	NA	67	NA	9	9	Poly(A+)	PROSTATE	Bilateral	Overlapping	Apex|Middle|Base	POSITIVE	N1	T3b	NA	NO	NA	not_fused	not_fused	not_fused	not_fused
	578	TCGA	TCGA-ZG-A8QW-01	TCGA-ZG-A8QW-01	PRIMARY	WHITE	NA	72	NA	9	9	Poly(A+)	PROSTATE	Bilateral	Overlapping	Middle	POSITIVE	N1	T3b	T3a	NO	NA	not_fused	not_fused	not_fused	not_fused
	579	TCGA	TCGA-YL-A8SK-01	TCGA-YL-A8SK-01	PRIMARY	WHITE	NA	67	NA	9	9	Poly(A+)	PROSTATE	Bilateral	Overlapping	Apex|Middle|Base	POSITIVE	N1	T3b	NA	NO	NA	not_fused	not_fused	not_fused	not_fused
	580	TCGA	TCGA-YL-A9WI-01	TCGA-YL-A9WI-01	PRIMARY	WHITE	NA	63	NA	9	9	Poly(A+)	PROSTATE	Bilateral	Overlapping	Apex|Middle|Base	POSITIVE	N1	T3a	NA	NO	NA	not_fused	not_fused	not_fused	not_fused
	581	TCGA	TCGA-YL-A8SO-01	TCGA-YL-A8SO-01	PRIMARY	WHITE	NA	64	NA	9	9	Poly(A+)	PROSTATE	Bilateral	Overlapping	Apex|Middle	NA	NA	T3a	T1a	NO	NA	not_fused	not_fused	not_fused	not_fused
	582	TCGA	TCGA-YL-A8SL-01	TCGA-YL-A8SL-01	PRIMARY	WHITE	NA	74	NA	8	8	Poly(A+)	PROSTATE	Bilateral	Overlapping	Apex|Middle|Base	POSITIVE	N1	T3b	NA	NO	NA	fused	not_fused	not_fused	not_fused
	583	TCGA	TCGA-YL-A8SJ-01	TCGA-YL-A8SJ-01	PRIMARY	WHITE	NA	60	NA	9	9	Poly(A+)	PROSTATE	Bilateral	Overlapping	Middle|Base	NEGATIVE	N0	T3b	NA	YES	752	not_fused	not_fused	not_fused	not_fused
	584	TCGA	TCGA-YL-A8SA-01	TCGA-YL-A8SA-01	PRIMARY	WHITE	NA	69	NA	8	8	Poly(A+)	PROSTATE	Bilateral	Overlapping	Apex|Middle|Base	NEGATIVE	N0	T3b	T2b	NO	NA	fused	not_fused	not_fused	not_fused
	585	TCGA	TCGA-YL-A9WJ-01	TCGA-YL-A9WJ-01	PRIMARY	WHITE	NA	47	NA	8	8	Poly(A+)	PROSTATE	Bilateral	Overlapping	Apex|Middle	POSITIVE	N1	T3b	T4	YES	76	not_fused	not_fused	not_fused	not_fused
	586	TCGA	TCGA-XJ-A9DQ-01	TCGA-XJ-A9DQ-01	PRIMARY	WHITE	NA	48	NA	6	6	Poly(A+)	PROSTATE	Right	Peripheral Zone	Apex|Base	NA	NA	T2a	T1c	NO	NA	fused	not_fused	not_fused	not_fused
	587	TCGA	TCGA-ZG-A8QX-01	TCGA-ZG-A8QX-01	PRIMARY	WHITE	NA	56	NA	6	6	Poly(A+)	PROSTATE	Bilateral	Overlapping	Middle	NEGATIVE	N0	T2c	T1c	NO	NA	not_fused	not_fused	not_fused	not_fused
	588	TCGA	TCGA-V1-A8WS-01	TCGA-V1-A8WS-01	PRIMARY	WHITE	NA	56	NA	6	6	Poly(A+)	PROSTATE	Bilateral	Peripheral Zone	Apex	NA	NA	T3b	T1c	NO	NA	fused	not_fused	not_fused	not_fused
	589	TCGA	TCGA-ZG-A8QY-01	TCGA-ZG-A8QY-01	PRIMARY	WHITE	NA	67	NA	9	9	Poly(A+)	PROSTATE	Bilateral	Overlapping	Base	POSITIVE	N1	T3b	T2c	NO	NA	not_fused	not_fused	not_fused	not_fused
	590	TCGA	TCGA-YL-A8SF-01	TCGA-YL-A8SF-01	PRIMARY	WHITE	NA	62	NA	8	8	Poly(A+)	PROSTATE	Bilateral	Overlapping	Apex|Middle|Base	NEGATIVE	N0	T3b	NA	NO	NA	fused	not_fused	not_fused	not_fused
	591	TCGA	TCGA-YL-A8SB-01	TCGA-YL-A8SB-01	PRIMARY	WHITE	NA	62	NA	9	9	Poly(A+)	PROSTATE	Bilateral	Overlapping	Apex|Middle|Base	NEGATIVE	N0	T3a	NA	NO	NA	not_fused	not_fused	not_fused	not_fused
	592	TCGA	TCGA-V1-A8WL-01	TCGA-V1-A8WL-01	PRIMARY	BLACK	NA	64	NA	7	7	Poly(A+)	PROSTATE	Bilateral	Peripheral Zone	Apex	NEGATIVE	N0	T3a	T1c	NO	NA	not_fused	not_fused	not_fused	not_fused
	593	TCGA	TCGA-YL-A8SC-01	TCGA-YL-A8SC-01	PRIMARY	WHITE	NA	66	NA	9	9	Poly(A+)	PROSTATE	Bilateral	Overlapping	Apex|Middle|Base	NEGATIVE	N0	T3a	NA	NO	NA	not_fused	not_fused	not_fused	not_fused
	594	TCGA	TCGA-YL-A8SR-01	TCGA-YL-A8SR-01	PRIMARY	WHITE	NA	64	NA	9	9	Poly(A+)	PROSTATE	Bilateral	Overlapping	Apex|Middle|Base	NEGATIVE	N0	T3a	T1c	NO	NA	not_fused	not_fused	not_fused	not_fused
	595	TCGA	TCGA-XJ-A9DX-01	TCGA-XJ-A9DX-01	PRIMARY	NA	NA	51	NA	9	9	Poly(A+)	PROSTATE	Bilateral	Peripheral Zone	Base	POSITIVE	N1	T3b	T1c	NO	NA	not_fused	not_fused	not_fused	not_fused
	596	TCGA	TCGA-YL-A8SQ-01	TCGA-YL-A8SQ-01	PRIMARY	WHITE	NA	61	NA	9	9	Poly(A+)	PROSTATE	Bilateral	Overlapping	Apex|Middle|Base	NEGATIVE	N0	T3b	NA	YES	329	not_fused	not_fused	not_fused	not_fused
	597	TCGA	TCGA-XJ-A9DK-01	TCGA-XJ-A9DK-01	PRIMARY	WHITE	NA	63	NA	8	8	Poly(A+)	PROSTATE	Right	Peripheral Zone	Apex	NA	NA	T2c	T1c	NO	NA	fused	not_fused	not_fused	not_fused
	598	TCGA	TCGA-ZG-A8QZ-01	TCGA-ZG-A8QZ-01	PRIMARY	WHITE	NA	65	NA	9	9	Poly(A+)	PROSTATE	Bilateral	Overlapping	Middle	POSITIVE	N1	T3b	T2a	NO	NA	fused	not_fused	not_fused	not_fused
	599	TCGA	TCGA-V1-A8WN-01	TCGA-V1-A8WN-01	PRIMARY	BLACK	NA	47	NA	6	6	Poly(A+)	PROSTATE	Bilateral	Peripheral Zone	Apex	NA	NA	T2c	T2a	NO	NA	not_fused	not_fused	not_fused	not_fused
	600	TCGA	TCGA-YL-A8SP-01	TCGA-YL-A8SP-01	PRIMARY	WHITE	NA	58	NA	9	9	Poly(A+)	PROSTATE	Bilateral	Overlapping	Apex|Middle|Base	NA	NA	T3b	T2a	NO	NA	fused	not_fused	not_fused	not_fused
	601	TCGA	TCGA-2A-A8VV-01	TCGA-2A-A8VV-01	PRIMARY	NA	NA	52	NA	6	6	Poly(A+)	PROSTATE	Right	Peripheral Zone	Apex|Middle	NEGATIVE	N0	T2b	T2b	NO	NA	fused	not_fused	not_fused	not_fused
	602	TCGA	TCGA-2A-A8VX-01	TCGA-2A-A8VX-01	PRIMARY	WHITE	NA	70	NA	8	8	Poly(A+)	PROSTATE	Bilateral	Peripheral Zone	Middle	NEGATIVE	N0	T3b	T2c	NO	NA	not_fused	not_fused	not_fused	not_fused
	603	TCGA	TCGA-2A-A8W1-01	TCGA-2A-A8W1-01	PRIMARY	ASIAN	NA	54	NA	7	7	Poly(A+)	PROSTATE	Left	Peripheral Zone	Middle|Base	NEGATIVE	N0	T3a	T1c	NO	NA	not_fused	not_fused	not_fused	not_fused
	604	TCGA	TCGA-2A-AAYF-01	TCGA-2A-AAYF-01	PRIMARY	WHITE	NA	57	NA	7	7	Poly(A+)	PROSTATE	Right	Overlapping	Apex|Middle|Base	NA	NA	T3a	T1c	NO	NA	not_fused	not_fused	not_fused	not_fused
	605	TCGA	TCGA-2A-AAYO-01	TCGA-2A-AAYO-01	PRIMARY	WHITE	NA	57	NA	6	6	Poly(A+)	PROSTATE	Bilateral	Overlapping	Apex|Middle	NA	NA	T2c	T1c	NO	NA	not_fused	not_fused	not_fused	not_fused
	606	TCGA	TCGA-TP-A8TV-01	TCGA-TP-A8TV-01	PRIMARY	WHITE	NA	62	NA	7	7	Poly(A+)	PROSTATE	Bilateral	Overlapping	Apex|Middle|Base	NEGATIVE	N0	T2c	T1c	NO	NA	not_fused	not_fused	not_fused	not_fused
	607	TCGA	TCGA-G9-A9S7-01	TCGA-G9-A9S7-01	PRIMARY	WHITE	NA	55	NA	8	8	Poly(A+)	PROSTATE	Bilateral	Overlapping	Apex|Middle	NEGATIVE	N0	T3a	T2a	NO	NA	fused	not_fused	not_fused	not_fused
	608	TCGA	TCGA-J4-AATZ-01	TCGA-J4-AATZ-01	PRIMARY	ASIAN	NA	66	NA	9	9	Poly(A+)	PROSTATE	Bilateral	Peripheral Zone	Apex	NEGATIVE	N0	T3a	NA	YES	79	not_fused	not_fused	not_fused	not_fused
	609	TCGA	TCGA-G9-A9S4-01	TCGA-G9-A9S4-01	PRIMARY	WHITE	NA	62	NA	8	8	Poly(A+)	PROSTATE	Bilateral	Overlapping	Apex|Middle|Base	POSITIVE	N1	T3b	T2a	NO	NA	NA	NA	NA	NA
	610	TCGA	TCGA-2A-AAYU-01	TCGA-2A-AAYU-01	PRIMARY	WHITE	NA	56	NA	6	6	Poly(A+)	PROSTATE	Left	Overlapping	Apex|Middle|Base	NEGATIVE	N0	T3a	T1c	NO	NA	fused	not_fused	not_fused	not_fused
	611	TCGA	TCGA-YL-A8SI-01	TCGA-YL-A8SI-01	PRIMARY	WHITE	NA	69	NA	9	9	Poly(A+)	PROSTATE	Bilateral	Overlapping	Apex|Middle|Base	NEGATIVE	N0	T3a	NA	YES	1423	not_fused	not_fused	not_fused	not_fused
	612	TCGA	TCGA-V1-A9OL-01	TCGA-V1-A9OL-01	PRIMARY	ASIAN	NA	65	NA	9	9	Poly(A+)	PROSTATE	Bilateral	Peripheral Zone	Apex	NEGATIVE	N0	T3b	T2	YES	131	not_fused	not_fused	not_fused	not_fused
	613	TCGA	TCGA-V1-A9OQ-01	TCGA-V1-A9OQ-01	PRIMARY	WHITE	NA	67	NA	6	6	Poly(A+)	PROSTATE	Bilateral	Peripheral Zone	Apex	NA	NA	T3a	T1c	NO	NA	not_fused	not_fused	not_fused	not_fused
	614	TCGA	TCGA-XK-AAIW-01	TCGA-XK-AAIW-01	PRIMARY	WHITE	NA	78	NA	9	9	Poly(A+)	PROSTATE	Bilateral	NA	Middle|Base	NEGATIVE	N0	T3b	T2b	NO	NA	not_fused	not_fused	not_fused	not_fused
	615	TCGA	TCGA-XK-AAJ3-01	TCGA-XK-AAJ3-01	PRIMARY	WHITE	NA	56	NA	8	8	Poly(A+)	PROSTATE	Bilateral	NA	Apex|Middle|Base	NEGATIVE	N0	T3a	T1c	NO	NA	NA	NA	NA	NA
	616	TCGA	TCGA-ZG-A9L2-01	TCGA-ZG-A9L2-01	PRIMARY	WHITE	NA	70	NA	9	9	Poly(A+)	PROSTATE	NA	Peripheral Zone	NA	NEGATIVE	N0	T3b	T3a	YES	180	fused	not_fused	not_fused	not_fused
	617	TCGA	TCGA-V1-A9O5-01	TCGA-V1-A9O5-01	PRIMARY	WHITE	NA	64	NA	9	9	Poly(A+)	PROSTATE	Bilateral	Peripheral Zone	Apex	POSITIVE	N1	T4	T2b	YES	124	not_fused	not_fused	not_fused	not_fused
	618	TCGA	TCGA-V1-A9ZG-01	TCGA-V1-A9ZG-01	PRIMARY	WHITE	NA	64	NA	9	9	Poly(A+)	PROSTATE	Bilateral	Peripheral Zone	Apex	NEGATIVE	N0	T2c	T1c	NO	NA	fused	not_fused	not_fused	not_fused
	619	TCGA	TCGA-V1-A9ZI-01	TCGA-V1-A9ZI-01	PRIMARY	WHITE	NA	68	NA	9	9	Poly(A+)	PROSTATE	Bilateral	Peripheral Zone	Middle	NEGATIVE	N0	T3b	NA	YES	86	not_fused	not_fused	not_fused	not_fused
	620	TCGA	TCGA-Y6-A9XI-01	TCGA-Y6-A9XI-01	PRIMARY	NA	NA	72	NA	8	8	Poly(A+)	PROSTATE	Bilateral	Peripheral Zone	Apex	NEGATIVE	N0	NA	NA	NO	NA	not_fused	not_fused	not_fused	not_fused
	621	TCGA	TCGA-ZG-A9LS-01	TCGA-ZG-A9LS-01	PRIMARY	WHITE	NA	64	NA	9	9	Poly(A+)	PROSTATE	Bilateral	Central Zone	Apex|Middle|Base	POSITIVE	N1	T3b	T2a	NO	NA	not_fused	not_fused	not_fused	not_fused
	622	TCGA	TCGA-ZG-A9LU-01	TCGA-ZG-A9LU-01	PRIMARY	WHITE	NA	67	NA	9	9	Poly(A+)	PROSTATE	Bilateral	Overlapping	Apex|Middle|Base	NEGATIVE	N0	T3a	T2b	NO	NA	not_fused	not_fused	not_fused	not_fused
	623	TCGA	TCGA-ZG-A9L4-01	TCGA-ZG-A9L4-01	PRIMARY	WHITE	NA	61	NA	9	9	Poly(A+)	PROSTATE	Bilateral	Overlapping	Apex|Middle|Base	NEGATIVE	N0	T3b	T1c	NO	NA	fused	not_fused	not_fused	not_fused
	624	TCGA	TCGA-ZG-A9NI-01	TCGA-ZG-A9NI-01	PRIMARY	WHITE	NA	73	NA	9	9	Poly(A+)	PROSTATE	Bilateral	Overlapping	Apex|Middle|Base	NEGATIVE	N0	T3b	T2a	NO	NA	not_fused	not_fused	not_fused	not_fused
	625	TCGA	TCGA-4L-AA1F-01	TCGA-4L-AA1F-01	PRIMARY	WHITE	NA	64	NA	8	8	Poly(A+)	PROSTATE	Bilateral	Overlapping	Middle	NEGATIVE	N0	T3b	T2c	NO	NA	fused	not_fused	not_fused	not_fused
	626	TCGA	TCGA-HC-A9TH-01	TCGA-HC-A9TH-01	PRIMARY	WHITE	NA	58	NA	9	9	Poly(A+)	PROSTATE	Bilateral	NA	Apex|Middle|Base	NEGATIVE	N0	T3b	T1b	NO	NA	not_fused	not_fused	not_fused	not_fused
	627	TCGA	TCGA-V1-A9OT-01	TCGA-V1-A9OT-01	PRIMARY	WHITE	NA	61	NA	6	6	Poly(A+)	PROSTATE	Bilateral	Peripheral Zone	Middle	NA	NA	T2c	T1c	NO	NA	fused	not_fused	not_fused	not_fused
	628	TCGA	TCGA-V1-A9OF-01	TCGA-V1-A9OF-01	PRIMARY	WHITE	NA	49	NA	6	6	Poly(A+)	PROSTATE	Bilateral	Peripheral Zone	Apex	NA	NA	T2c	T1c	NO	NA	not_fused	not_fused	not_fused	not_fused
	629	TCGA	TCGA-MG-AAMC-01	TCGA-MG-AAMC-01	PRIMARY	WHITE	NA	59	NA	9	9	Poly(A+)	PROSTATE	NA	NA	NA	NEGATIVE	N0	T3a	T1c	NO	NA	fused	not_fused	not_fused	not_fused
	630	TCGA	TCGA-V1-A9OA-01	TCGA-V1-A9OA-01	PRIMARY	WHITE	NA	61	NA	9	9	Poly(A+)	PROSTATE	Bilateral	Peripheral Zone	Apex	POSITIVE	N1	T3b	T2c	NO	NA	not_fused	not_fused	not_fused	not_fused
	631	TCGA	TCGA-EJ-AB20-01	TCGA-EJ-AB20-01	PRIMARY	NA	NA	61	NA	6	6	Poly(A+)	PROSTATE	Bilateral	NA	NA	NEGATIVE	N0	T2c	T2c	NO	NA	not_fused	not_fused	not_fused	not_fused
	632	TCGA	TCGA-EJ-AB27-01	TCGA-EJ-AB27-01	PRIMARY	WHITE	NA	51	NA	6	6	Poly(A+)	PROSTATE	Bilateral	NA	NA	NEGATIVE	N0	T2c	T1c	NO	NA	not_fused	not_fused	fused	not_fused
	633	TCGA	TCGA-J4-AATV-01	TCGA-J4-AATV-01	PRIMARY	WHITE	NA	71	NA	6	6	Poly(A+)	PROSTATE	Bilateral	NA	NA	NEGATIVE	N0	T2c	NA	NO	NA	fused	not_fused	not_fused	not_fused
	634	TCGA	TCGA-V1-A9OX-01	TCGA-V1-A9OX-01	PRIMARY	WHITE	NA	56	NA	8	8	Poly(A+)	PROSTATE	Bilateral	Peripheral Zone	Apex	NEGATIVE	N0	T2c	NA	NO	NA	not_fused	not_fused	not_fused	not_fused
	635	TCGA	TCGA-G9-7509-01	TCGA-G9-7509-01	PRIMARY	BLACK	NA	48	NA	6	6	Poly(A+)	PROSTATE	Bilateral	NA	Apex|Middle|Base	NA	NA	T2c	T1c	NO	NA	fused	not_fused	not_fused	not_fused
	636	TCGA	TCGA-J4-AAU2-01	TCGA-J4-AAU2-01	PRIMARY	WHITE	NA	59	NA	6	6	Poly(A+)	PROSTATE	Bilateral	NA	NA	NEGATIVE	N0	T2c	NA	NO	NA	not_fused	not_fused	not_fused	not_fused
	637	TCGA	TCGA-V1-A9O9-01	TCGA-V1-A9O9-01	PRIMARY	WHITE	NA	56	NA	8	8	Poly(A+)	PROSTATE	Bilateral	Peripheral Zone	Apex	NEGATIVE	N0	T3b	NA	NO	NA	fused	not_fused	not_fused	not_fused
	638	TCGA	TCGA-V1-A9O7-01	TCGA-V1-A9O7-01	PRIMARY	WHITE	NA	60	NA	9	9	Poly(A+)	PROSTATE	Bilateral	Peripheral Zone	Apex	NEGATIVE	N0	T3a	T2b	YES	921	not_fused	not_fused	not_fused	not_fused
	639	TCGA	TCGA-HC-A9TE-01	TCGA-HC-A9TE-01	PRIMARY	WHITE	NA	64	NA	9	9	Poly(A+)	PROSTATE	Bilateral	Overlapping	Apex|Middle|Base	NEGATIVE	N0	T3b	T2c	NO	NA	not_fused	not_fused	not_fused	not_fused
	640	TCGA	TCGA-XK-AAJP-01	TCGA-XK-AAJP-01	PRIMARY	WHITE	NA	66	NA	7	7	Poly(A+)	PROSTATE	Left	Peripheral Zone	Middle|Base	NEGATIVE	N0	T3a	T1c	NO	NA	not_fused	not_fused	not_fused	not_fused
	641	TCGA	TCGA-ZG-A9L5-01	TCGA-ZG-A9L5-01	PRIMARY	WHITE	NA	58	NA	9	9	Poly(A+)	PROSTATE	Bilateral	Overlapping	Apex|Middle|Base	POSITIVE	N1	T4	T2a	NO	NA	not_fused	not_fused	not_fused	not_fused
	642	TCGA	TCGA-V1-A9Z7-01	TCGA-V1-A9Z7-01	PRIMARY	WHITE	NA	54	NA	9	9	Poly(A+)	PROSTATE	Bilateral	Peripheral Zone	Apex	NEGATIVE	N0	T3b	T2	NO	NA	not_fused	not_fused	not_fused	not_fused
	643	TCGA	TCGA-VN-A943-01	TCGA-VN-A943-01	PRIMARY	WHITE	NA	71	NA	8	8	Poly(A+)	PROSTATE	Bilateral	Overlapping	Apex|Middle|Base	NEGATIVE	N0	T2c	T1c	NO	NA	not_fused	not_fused	not_fused	not_fused
	644	TCGA	TCGA-VP-AA1N-01	TCGA-VP-AA1N-01	PRIMARY	WHITE	NA	70	NA	9	9	Poly(A+)	PROSTATE	Bilateral	Overlapping	Apex|Base	NEGATIVE	N0	T3a	T1c	NO	NA	not_fused	not_fused	not_fused	not_fused
	645	TCGA	TCGA-XK-AAJR-01	TCGA-XK-AAJR-01	PRIMARY	WHITE	NA	61	NA	7	7	Poly(A+)	PROSTATE	Bilateral	NA	Apex|Middle|Base	NEGATIVE	N0	T3a	T1c	YES	131	not_fused	not_fused	not_fused	not_fused
	646	TCGA	TCGA-YL-A9WX-01	TCGA-YL-A9WX-01	PRIMARY	WHITE	NA	68	NA	9	9	Poly(A+)	PROSTATE	Bilateral	Overlapping	Middle	POSITIVE	N1	T3b	T3a	YES	1506	fused	not_fused	not_fused	not_fused
	647	TCGA	TCGA-V1-A9ZR-01	TCGA-V1-A9ZR-01	PRIMARY	WHITE	NA	68	NA	8	8	Poly(A+)	PROSTATE	Bilateral	Peripheral Zone	Apex	NEGATIVE	N0	T4	T2c	NO	NA	not_fused	not_fused	not_fused	fused
	648	TCGA	TCGA-YL-A9WL-01	TCGA-YL-A9WL-01	PRIMARY	WHITE	NA	59	NA	9	9	Poly(A+)	PROSTATE	Bilateral	Overlapping	Apex|Middle|Base	NEGATIVE	N0	T3a	T2a	YES	740	fused	not_fused	not_fused	not_fused
	649	TCGA	TCGA-V1-A9OY-01	TCGA-V1-A9OY-01	PRIMARY	WHITE	NA	57	NA	7	7	Poly(A+)	PROSTATE	Bilateral	Peripheral Zone	Apex	POSITIVE	N1	T3a	T2	NO	NA	fused	not_fused	not_fused	not_fused
	650	TCGA	TCGA-ZG-A9LB-01	TCGA-ZG-A9LB-01	PRIMARY	WHITE	NA	72	NA	9	9	Poly(A+)	PROSTATE	Right	Overlapping	Apex|Middle|Base	NEGATIVE	N0	T3b	T2a	NO	NA	not_fused	not_fused	not_fused	not_fused
	651	TCGA	TCGA-ZG-A9KY-01	TCGA-ZG-A9KY-01	PRIMARY	WHITE	NA	73	NA	9	9	Poly(A+)	PROSTATE	Bilateral	Overlapping	Apex|Middle|Base	POSITIVE	N1	T4	T1c	NO	NA	not_fused	not_fused	not_fused	not_fused
	652	TCGA	TCGA-ZG-A9L9-01	TCGA-ZG-A9L9-01	PRIMARY	WHITE	NA	60	NA	9	9	Poly(A+)	PROSTATE	Bilateral	Overlapping	Apex|Middle|Base	POSITIVE	N1	T3b	T2b	YES	51	fused	not_fused	not_fused	not_fused
	653	TCGA	TCGA-XK-AAJA-01	TCGA-XK-AAJA-01	PRIMARY	NA	NA	62	NA	7	7	Poly(A+)	PROSTATE	Bilateral	NA	Apex|Middle|Base	NEGATIVE	N0	T3a	T2a	NO	NA	not_fused	not_fused	not_fused	not_fused
	654	TCGA	TCGA-V1-A9ZK-01	TCGA-V1-A9ZK-01	PRIMARY	WHITE	NA	68	NA	8	8	Poly(A+)	PROSTATE	Left	Peripheral Zone	Middle	NEGATIVE	N0	T3b	T2a	NO	NA	not_fused	not_fused	not_fused	not_fused
	655	TCGA	TCGA-XK-AAJT-01	TCGA-XK-AAJT-01	PRIMARY	WHITE	NA	75	NA	7	7	Poly(A+)	PROSTATE	Bilateral	Peripheral Zone	Base	NEGATIVE	N0	T3a	T1c	NO	NA	not_fused	not_fused	not_fused	not_fused
	656	TCGA	TCGA-YL-A9WY-01	TCGA-YL-A9WY-01	PRIMARY	WHITE	NA	57	NA	9	9	Poly(A+)	PROSTATE	Bilateral	Overlapping	Apex|Middle|Base	POSITIVE	N1	T3b	T3a	YES	765	not_fused	not_fused	not_fused	not_fused
	657	TCGA	TCGA-ZG-A9L6-01	TCGA-ZG-A9L6-01	PRIMARY	WHITE	NA	64	NA	9	9	Poly(A+)	PROSTATE	Bilateral	Overlapping	Apex|Middle|Base	NEGATIVE	N0	T3b	T1c	YES	664	not_fused	not_fused	not_fused	not_fused
	658	TCGA	TCGA-ZG-A9LY-01	TCGA-ZG-A9LY-01	PRIMARY	WHITE	NA	60	NA	9	9	Poly(A+)	PROSTATE	Bilateral	Overlapping	Apex|Middle|Base	POSITIVE	N1	T3b	T2b	NO	NA	not_fused	not_fused	not_fused	not_fused
	659	TCGA	TCGA-ZG-A9M4-01	TCGA-ZG-A9M4-01	PRIMARY	WHITE	NA	65	NA	9	9	Poly(A+)	PROSTATE	Bilateral	Overlapping	Apex|Middle|Base	POSITIVE	N1	T3b	T2a	NO	NA	not_fused	not_fused	not_fused	not_fused
	660	TCGA	TCGA-ZG-A9LZ-01	TCGA-ZG-A9LZ-01	PRIMARY	WHITE	NA	66	NA	9	9	Poly(A+)	PROSTATE	Bilateral	Overlapping	Apex|Middle|Base	NEGATIVE	N0	T3b	T3a	YES	310	fused	not_fused	not_fused	not_fused
	661	TCGA	TCGA-ZG-A9MC-01	TCGA-ZG-A9MC-01	PRIMARY	WHITE	NA	69	NA	9	9	Poly(A+)	PROSTATE	Bilateral	Peripheral Zone	Apex|Middle|Base	POSITIVE	N1	T3b	T2a	NO	NA	fused	not_fused	not_fused	not_fused
	662	TCGA	TCGA-XK-AAJU-01	TCGA-XK-AAJU-01	PRIMARY	WHITE	NA	65	NA	7	7	Poly(A+)	PROSTATE	Bilateral	NA	Apex|Middle|Base	NEGATIVE	N0	T2c	T1c	NO	NA	not_fused	not_fused	not_fused	not_fused
	663	TCGA	TCGA-XK-AAIV-01	TCGA-XK-AAIV-01	PRIMARY	WHITE	NA	63	NA	10	10	Poly(A+)	PROSTATE	Bilateral	NA	Apex|Middle|Base	POSITIVE	N1	T3b	T1c	NO	NA	not_fused	not_fused	not_fused	not_fused
	664	TCGA	TCGA-TP-A8TT-01	TCGA-TP-A8TT-01	PRIMARY	WHITE	NA	64	NA	7	7	Poly(A+)	PROSTATE	Left	Peripheral Zone	Apex|Middle|Base	NEGATIVE	N0	T3a	T1c	NO	NA	fused	not_fused	not_fused	not_fused
	665	TCGA	TCGA-XK-AAK1-01	TCGA-XK-AAK1-01	PRIMARY	WHITE	NA	62	NA	7	7	Poly(A+)	PROSTATE	Bilateral	NA	Apex|Middle|Base	NEGATIVE	N0	T2c	T1c	NO	NA	NA	NA	NA	NA
	666	TCGA	TCGA-V1-A9Z8-01	TCGA-V1-A9Z8-01	PRIMARY	WHITE	NA	59	NA	9	9	Poly(A+)	PROSTATE	Bilateral	Peripheral Zone	Apex	NEGATIVE	N0	T3b	NA	NO	NA	not_fused	not_fused	not_fused	not_fused
	667	TCGA	TCGA-V1-A9OH-01	TCGA-V1-A9OH-01	PRIMARY	WHITE	NA	63	NA	8	8	Poly(A+)	PROSTATE	Right	Peripheral Zone	Apex	NA	NA	T2b	T1c	NO	NA	not_fused	not_fused	not_fused	not_fused
	668	TCGA	TCGA-G9-A9S0-01	TCGA-G9-A9S0-01	PRIMARY	WHITE	NA	53	NA	8	8	Poly(A+)	PROSTATE	Bilateral	Overlapping	Apex|Middle|Base	POSITIVE	N1	T3b	T2a	YES	429	not_fused	not_fused	not_fused	not_fused
	669	TCGA	TCGA-ZG-A9ND-01	TCGA-ZG-A9ND-01	PRIMARY	WHITE	NA	55	NA	9	9	Poly(A+)	PROSTATE	Bilateral	Overlapping	Apex|Middle	NEGATIVE	N0	T3a	T1c	NO	NA	not_fused	not_fused	not_fused	not_fused
	670	TCGA	TCGA-ZG-A9N3-01	TCGA-ZG-A9N3-01	PRIMARY	WHITE	NA	73	NA	9	9	Poly(A+)	PROSTATE	Bilateral	Overlapping	Apex|Middle|Base	POSITIVE	N1	T3b	T1c	NO	NA	fused	not_fused	not_fused	not_fused
	671	TCGA	TCGA-ZG-A9LM-01	TCGA-ZG-A9LM-01	PRIMARY	WHITE	NA	72	NA	9	9	Poly(A+)	PROSTATE	Right	Peripheral Zone	Middle|Base	POSITIVE	N1	T3a	T2b	NO	NA	not_fused	not_fused	not_fused	not_fused
	672	TCGA	TCGA-ZG-A9L1-01	TCGA-ZG-A9L1-01	PRIMARY	WHITE	NA	66	NA	9	9	Poly(A+)	PROSTATE	Bilateral	Peripheral Zone	Apex|Middle|Base	POSITIVE	N1	T3b	T1c	NO	NA	fused	not_fused	not_fused	not_fused
	673	TCGA	TCGA-V1-A9Z9-01	TCGA-V1-A9Z9-01	PRIMARY	WHITE	NA	63	NA	9	9	Poly(A+)	PROSTATE	Bilateral	Peripheral Zone	Apex	NEGATIVE	N0	T2c	T1c	NO	NA	not_fused	not_fused	not_fused	not_fused
	674	TCGA	TCGA-XK-AAIR-01	TCGA-XK-AAIR-01	PRIMARY	WHITE	NA	75	NA	8	8	Poly(A+)	PROSTATE	Bilateral	NA	Apex|Middle	NEGATIVE	N0	T2c	T1c	NO	NA	not_fused	not_fused	not_fused	not_fused
	675	TCGA	TCGA-ZG-A9L0-01	TCGA-ZG-A9L0-01	PRIMARY	WHITE	NA	71	NA	9	9	Poly(A+)	PROSTATE	Bilateral	Overlapping	Apex|Middle|Base	POSITIVE	N1	T3b	NA	NO	NA	not_fused	not_fused	not_fused	not_fused
	676	TCGA	TCGA-M7-A722-01	TCGA-M7-A722-01	PRIMARY	WHITE	NA	65	NA	8	8	Poly(A+)	PROSTATE	Bilateral	Overlapping	NA	NEGATIVE	N0	T3a	T2a	YES	559	not_fused	not_fused	not_fused	not_fused
	677	TCGA	TCGA-X4-A8KS-01	TCGA-X4-A8KS-01	PRIMARY	BLACK	NA	61	NA	7	7	Poly(A+)	PROSTATE	Bilateral	Peripheral Zone	NA	NA	NA	T2c	T2c	NO	NA	not_fused	not_fused	not_fused	not_fused
	678	TCGA	TCGA-YL-A9WK-01	TCGA-YL-A9WK-01	PRIMARY	BLACK	NA	63	NA	9	9	Poly(A+)	PROSTATE	Bilateral	Overlapping	Middle	NEGATIVE	N0	T3b	T2b	YES	1009	not_fused	not_fused	not_fused	not_fused
	679	TCGA	TCGA-ZG-A9LN-01	TCGA-ZG-A9LN-01	PRIMARY	WHITE	NA	57	NA	9	9	Poly(A+)	PROSTATE	Bilateral	Overlapping	Apex|Middle|Base	POSITIVE	N1	T3b	T1c	NO	NA	not_fused	not_fused	not_fused	not_fused
	680	TCGA	TCGA-V1-A9O5-06	TCGA-V1-A9O5-06	CRPC	WHITE	NA	64	NA	NA	NA	Poly(A+)	PROSTATE	Bilateral	Peripheral Zone	Apex	POSITIVE	N1	T4	T2b	YES	124	not_fused	not_fused	not_fused	not_fused
	681	GSE120741	P223T	P223T	PRIMARY	NA	NA	NA	NA	NA	NA	Poly(A+)	PROSTATE	NA	NA	NA	NA	NA	NA	NA	YES	NA	NA	NA	NA	NA
	682	GSE120741	P265T	P265T	PRIMARY	NA	NA	NA	NA	NA	NA	Poly(A+)	PROSTATE	NA	NA	NA	NA	NA	NA	NA	YES	NA	NA	NA	NA	NA
	683	GSE120741	P252T	P252T	PRIMARY	NA	NA	NA	NA	NA	NA	Poly(A+)	PROSTATE	NA	NA	NA	NA	NA	NA	NA	NO	NA	NA	NA	NA	NA
	684	GSE120741	P227T	P227T	PRIMARY	NA	NA	NA	NA	NA	NA	Poly(A+)	PROSTATE	NA	NA	NA	NA	NA	NA	NA	YES	NA	NA	NA	NA	NA
	685	GSE120741	P348T	P348T	PRIMARY	NA	NA	NA	NA	NA	NA	Poly(A+)	PROSTATE	NA	NA	NA	NA	NA	NA	NA	YES	NA	NA	NA	NA	NA
	686	GSE120741	P228T	P228T	PRIMARY	NA	NA	NA	NA	NA	NA	Poly(A+)	PROSTATE	NA	NA	NA	NA	NA	NA	NA	NO	NA	NA	NA	NA	NA
	687	GSE120741	P423T	P423T	PRIMARY	NA	NA	NA	NA	NA	NA	Poly(A+)	PROSTATE	NA	NA	NA	NA	NA	NA	NA	YES	NA	NA	NA	NA	NA
	688	GSE120741	P229T	P229T	PRIMARY	NA	NA	NA	NA	NA	NA	Poly(A+)	PROSTATE	NA	NA	NA	NA	NA	NA	NA	YES	NA	NA	NA	NA	NA
	689	GSE120741	P297T	P297T	PRIMARY	NA	NA	NA	NA	NA	NA	Poly(A+)	PROSTATE	NA	NA	NA	NA	NA	NA	NA	NO	NA	NA	NA	NA	NA
	690	GSE120741	P245T	P245T	PRIMARY	NA	NA	NA	NA	NA	NA	Poly(A+)	PROSTATE	NA	NA	NA	NA	NA	NA	NA	YES	NA	NA	NA	NA	NA
	691	GSE120741	P268T	P268T	PRIMARY	NA	NA	NA	NA	NA	NA	Poly(A+)	PROSTATE	NA	NA	NA	NA	NA	NA	NA	YES	NA	NA	NA	NA	NA
	692	GSE120741	P329T	P329T	PRIMARY	NA	NA	NA	NA	NA	NA	Poly(A+)	PROSTATE	NA	NA	NA	NA	NA	NA	NA	YES	NA	NA	NA	NA	NA
	693	GSE120741	P257T	P257T	PRIMARY	NA	NA	NA	NA	NA	NA	Poly(A+)	PROSTATE	NA	NA	NA	NA	NA	NA	NA	NO	NA	NA	NA	NA	NA
	694	GSE120741	P276T	P276T	PRIMARY	NA	NA	NA	NA	NA	NA	Poly(A+)	PROSTATE	NA	NA	NA	NA	NA	NA	NA	YES	NA	NA	NA	NA	NA
	695	GSE120741	P294T	P294T	PRIMARY	NA	NA	NA	NA	NA	NA	Poly(A+)	PROSTATE	NA	NA	NA	NA	NA	NA	NA	YES	NA	NA	NA	NA	NA
	696	GSE120741	P300T	P300T	PRIMARY	NA	NA	NA	NA	NA	NA	Poly(A+)	PROSTATE	NA	NA	NA	NA	NA	NA	NA	NO	NA	NA	NA	NA	NA
	697	GSE120741	P310T	P310T	PRIMARY	NA	NA	NA	NA	NA	NA	Poly(A+)	PROSTATE	NA	NA	NA	NA	NA	NA	NA	YES	NA	NA	NA	NA	NA
	698	GSE120741	P534T	P534T	PRIMARY	NA	NA	NA	NA	NA	NA	Poly(A+)	PROSTATE	NA	NA	NA	NA	NA	NA	NA	NO	NA	NA	NA	NA	NA
	699	GSE120741	P660T	P660T	PRIMARY	NA	NA	NA	NA	NA	NA	Poly(A+)	PROSTATE	NA	NA	NA	NA	NA	NA	NA	NO	NA	NA	NA	NA	NA
	700	GSE120741	P674T	P674T	PRIMARY	NA	NA	NA	NA	NA	NA	Poly(A+)	PROSTATE	NA	NA	NA	NA	NA	NA	NA	NO	NA	NA	NA	NA	NA
	701	GSE120741	P680T	P680T	PRIMARY	NA	NA	NA	NA	NA	NA	Poly(A+)	PROSTATE	NA	NA	NA	NA	NA	NA	NA	NO	NA	NA	NA	NA	NA
	702	GSE120741	P695T	P695T	PRIMARY	NA	NA	NA	NA	NA	NA	Poly(A+)	PROSTATE	NA	NA	NA	NA	NA	NA	NA	NO	NA	NA	NA	NA	NA
	703	GSE120741	P710T	P710T	PRIMARY	NA	NA	NA	NA	NA	NA	Poly(A+)	PROSTATE	NA	NA	NA	NA	NA	NA	NA	YES	NA	NA	NA	NA	NA
	704	GSE120741	P309T	P309T	PRIMARY	NA	NA	NA	NA	NA	NA	Poly(A+)	PROSTATE	NA	NA	NA	NA	NA	NA	NA	YES	NA	NA	NA	NA	NA
	705	GSE120741	P343T	P343T	PRIMARY	NA	NA	NA	NA	NA	NA	Poly(A+)	PROSTATE	NA	NA	NA	NA	NA	NA	NA	YES	NA	NA	NA	NA	NA
	706	GSE120741	P349T	P349T	PRIMARY	NA	NA	NA	NA	NA	NA	Poly(A+)	PROSTATE	NA	NA	NA	NA	NA	NA	NA	NO	NA	NA	NA	NA	NA
	707	GSE120741	P426T	P426T	PRIMARY	NA	NA	NA	NA	NA	NA	Poly(A+)	PROSTATE	NA	NA	NA	NA	NA	NA	NA	YES	NA	NA	NA	NA	NA
	708	GSE120741	P452T	P452T	PRIMARY	NA	NA	NA	NA	NA	NA	Poly(A+)	PROSTATE	NA	NA	NA	NA	NA	NA	NA	YES	NA	NA	NA	NA	NA
	709	GSE120741	P737T	P737T	PRIMARY	NA	NA	NA	NA	NA	NA	Poly(A+)	PROSTATE	NA	NA	NA	NA	NA	NA	NA	YES	NA	NA	NA	NA	NA
	710	GSE120741	P747T	P747T	PRIMARY	NA	NA	NA	NA	NA	NA	Poly(A+)	PROSTATE	NA	NA	NA	NA	NA	NA	NA	NO	NA	NA	NA	NA	NA
	711	GSE120741	P779T	P779T	PRIMARY	NA	NA	NA	NA	NA	NA	Poly(A+)	PROSTATE	NA	NA	NA	NA	NA	NA	NA	NO	NA	NA	NA	NA	NA
	712	GSE120741	P811T	P811T	PRIMARY	NA	NA	NA	NA	NA	NA	Poly(A+)	PROSTATE	NA	NA	NA	NA	NA	NA	NA	YES	NA	NA	NA	NA	NA
	713	GSE120741	P823T	P823T	PRIMARY	NA	NA	NA	NA	NA	NA	Poly(A+)	PROSTATE	NA	NA	NA	NA	NA	NA	NA	YES	NA	NA	NA	NA	NA
	714	GSE120741	P832T	P832T	PRIMARY	NA	NA	NA	NA	NA	NA	Poly(A+)	PROSTATE	NA	NA	NA	NA	NA	NA	NA	NO	NA	NA	NA	NA	NA
	715	GSE120741	P327T	P327T	PRIMARY	NA	NA	NA	NA	NA	NA	Poly(A+)	PROSTATE	NA	NA	NA	NA	NA	NA	NA	YES	NA	NA	NA	NA	NA
	716	GSE120741	P427T	P427T	PRIMARY	NA	NA	NA	NA	NA	NA	Poly(A+)	PROSTATE	NA	NA	NA	NA	NA	NA	NA	NO	NA	NA	NA	NA	NA
	717	GSE120741	P433T	P433T	PRIMARY	NA	NA	NA	NA	NA	NA	Poly(A+)	PROSTATE	NA	NA	NA	NA	NA	NA	NA	NO	NA	NA	NA	NA	NA
	718	GSE120741	P449T	P449T	PRIMARY	NA	NA	NA	NA	NA	NA	Poly(A+)	PROSTATE	NA	NA	NA	NA	NA	NA	NA	YES	NA	NA	NA	NA	NA
	719	GSE120741	P450T	P450T	PRIMARY	NA	NA	NA	NA	NA	NA	Poly(A+)	PROSTATE	NA	NA	NA	NA	NA	NA	NA	YES	NA	NA	NA	NA	NA
	720	GSE120741	P456T	P456T	PRIMARY	NA	NA	NA	NA	NA	NA	Poly(A+)	PROSTATE	NA	NA	NA	NA	NA	NA	NA	NO	NA	NA	NA	NA	NA
	721	GSE120741	P457T	P457T	PRIMARY	NA	NA	NA	NA	NA	NA	Poly(A+)	PROSTATE	NA	NA	NA	NA	NA	NA	NA	NO	NA	NA	NA	NA	NA
	722	GSE120741	P488T	P488T	PRIMARY	NA	NA	NA	NA	NA	NA	Poly(A+)	PROSTATE	NA	NA	NA	NA	NA	NA	NA	YES	NA	NA	NA	NA	NA
	723	GSE120741	P500T	P500T	PRIMARY	NA	NA	NA	NA	NA	NA	Poly(A+)	PROSTATE	NA	NA	NA	NA	NA	NA	NA	YES	NA	NA	NA	NA	NA
	724	GSE120741	P506T	P506T	PRIMARY	NA	NA	NA	NA	NA	NA	Poly(A+)	PROSTATE	NA	NA	NA	NA	NA	NA	NA	YES	NA	NA	NA	NA	NA
	725	GSE120741	P507T	P507T	PRIMARY	NA	NA	NA	NA	NA	NA	Poly(A+)	PROSTATE	NA	NA	NA	NA	NA	NA	NA	NO	NA	NA	NA	NA	NA
	726	GSE120741	P509T	P509T	PRIMARY	NA	NA	NA	NA	NA	NA	Poly(A+)	PROSTATE	NA	NA	NA	NA	NA	NA	NA	NO	NA	NA	NA	NA	NA
	727	GSE120741	P305T	P305T	PRIMARY	NA	NA	NA	NA	NA	NA	Poly(A+)	PROSTATE	NA	NA	NA	NA	NA	NA	NA	NO	NA	NA	NA	NA	NA
	728	GSE120741	P313T	P313T	PRIMARY	NA	NA	NA	NA	NA	NA	Poly(A+)	PROSTATE	NA	NA	NA	NA	NA	NA	NA	YES	NA	NA	NA	NA	NA
	729	GSE120741	P324T	P324T	PRIMARY	NA	NA	NA	NA	NA	NA	Poly(A+)	PROSTATE	NA	NA	NA	NA	NA	NA	NA	NO	NA	NA	NA	NA	NA
	730	GSE120741	P431T	P431T	PRIMARY	NA	NA	NA	NA	NA	NA	Poly(A+)	PROSTATE	NA	NA	NA	NA	NA	NA	NA	YES	NA	NA	NA	NA	NA
	731	GSE120741	P444T	P444T	PRIMARY	NA	NA	NA	NA	NA	NA	Poly(A+)	PROSTATE	NA	NA	NA	NA	NA	NA	NA	NO	NA	NA	NA	NA	NA
	732	GSE120741	P464T	P464T	PRIMARY	NA	NA	NA	NA	NA	NA	Poly(A+)	PROSTATE	NA	NA	NA	NA	NA	NA	NA	YES	NA	NA	NA	NA	NA
	733	GSE120741	P466T	P466T	PRIMARY	NA	NA	NA	NA	NA	NA	Poly(A+)	PROSTATE	NA	NA	NA	NA	NA	NA	NA	NO	NA	NA	NA	NA	NA
	734	GSE120741	P531T	P531T	PRIMARY	NA	NA	NA	NA	NA	NA	Poly(A+)	PROSTATE	NA	NA	NA	NA	NA	NA	NA	YES	NA	NA	NA	NA	NA
	735	GSE120741	P533T	P533T	PRIMARY	NA	NA	NA	NA	NA	NA	Poly(A+)	PROSTATE	NA	NA	NA	NA	NA	NA	NA	NO	NA	NA	NA	NA	NA
	736	GSE120741	P536T	P536T	PRIMARY	NA	NA	NA	NA	NA	NA	Poly(A+)	PROSTATE	NA	NA	NA	NA	NA	NA	NA	YES	NA	NA	NA	NA	NA
	737	GSE120741	P717T	P717T	PRIMARY	NA	NA	NA	NA	NA	NA	Poly(A+)	PROSTATE	NA	NA	NA	NA	NA	NA	NA	YES	NA	NA	NA	NA	NA
	738	GSE120741	P730T	P730T	PRIMARY	NA	NA	NA	NA	NA	NA	Poly(A+)	PROSTATE	NA	NA	NA	NA	NA	NA	NA	YES	NA	NA	NA	NA	NA
	739	GSE120741	P255T	P255T	PRIMARY	NA	NA	NA	NA	NA	NA	Poly(A+)	PROSTATE	NA	NA	NA	NA	NA	NA	NA	YES	NA	NA	NA	NA	NA
	740	GSE120741	P261T	P261T	PRIMARY	NA	NA	NA	NA	NA	NA	Poly(A+)	PROSTATE	NA	NA	NA	NA	NA	NA	NA	YES	NA	NA	NA	NA	NA
	741	GSE120741	P301T	P301T	PRIMARY	NA	NA	NA	NA	NA	NA	Poly(A+)	PROSTATE	NA	NA	NA	NA	NA	NA	NA	YES	NA	NA	NA	NA	NA
	742	GSE120741	P475T	P475T	PRIMARY	NA	NA	NA	NA	NA	NA	Poly(A+)	PROSTATE	NA	NA	NA	NA	NA	NA	NA	NO	NA	NA	NA	NA	NA
	743	GSE120741	P540T	P540T	PRIMARY	NA	NA	NA	NA	NA	NA	Poly(A+)	PROSTATE	NA	NA	NA	NA	NA	NA	NA	NO	NA	NA	NA	NA	NA
	744	GSE120741	P555T	P555T	PRIMARY	NA	NA	NA	NA	NA	NA	Poly(A+)	PROSTATE	NA	NA	NA	NA	NA	NA	NA	NO	NA	NA	NA	NA	NA
	745	GSE120741	P559T	P559T	PRIMARY	NA	NA	NA	NA	NA	NA	Poly(A+)	PROSTATE	NA	NA	NA	NA	NA	NA	NA	YES	NA	NA	NA	NA	NA
	746	GSE120741	P593T	P593T	PRIMARY	NA	NA	NA	NA	NA	NA	Poly(A+)	PROSTATE	NA	NA	NA	NA	NA	NA	NA	NO	NA	NA	NA	NA	NA
	747	GSE120741	P603T	P603T	PRIMARY	NA	NA	NA	NA	NA	NA	Poly(A+)	PROSTATE	NA	NA	NA	NA	NA	NA	NA	NO	NA	NA	NA	NA	NA
	748	GSE120741	P611T	P611T	PRIMARY	NA	NA	NA	NA	NA	NA	Poly(A+)	PROSTATE	NA	NA	NA	NA	NA	NA	NA	NO	NA	NA	NA	NA	NA
	749	GSE120741	P618T	P618T	PRIMARY	NA	NA	NA	NA	NA	NA	Poly(A+)	PROSTATE	NA	NA	NA	NA	NA	NA	NA	YES	NA	NA	NA	NA	NA
	750	GSE120741	P643T	P643T	PRIMARY	NA	NA	NA	NA	NA	NA	Poly(A+)	PROSTATE	NA	NA	NA	NA	NA	NA	NA	YES	NA	NA	NA	NA	NA
	751	GSE120741	P298T	P298T	PRIMARY	NA	NA	NA	NA	NA	NA	Poly(A+)	PROSTATE	NA	NA	NA	NA	NA	NA	NA	YES	NA	NA	NA	NA	NA
	752	GSE120741	P342T	P342T	PRIMARY	NA	NA	NA	NA	NA	NA	Poly(A+)	PROSTATE	NA	NA	NA	NA	NA	NA	NA	NO	NA	NA	NA	NA	NA
	753	GSE120741	P352T	P352T	PRIMARY	NA	NA	NA	NA	NA	NA	Poly(A+)	PROSTATE	NA	NA	NA	NA	NA	NA	NA	YES	NA	NA	NA	NA	NA
	754	GSE120741	P355T	P355T	PRIMARY	NA	NA	NA	NA	NA	NA	Poly(A+)	PROSTATE	NA	NA	NA	NA	NA	NA	NA	YES	NA	NA	NA	NA	NA
	755	GSE120741	P416T	P416T	PRIMARY	NA	NA	NA	NA	NA	NA	Poly(A+)	PROSTATE	NA	NA	NA	NA	NA	NA	NA	NO	NA	NA	NA	NA	NA
	756	GSE120741	P462T	P462T	PRIMARY	NA	NA	NA	NA	NA	NA	Poly(A+)	PROSTATE	NA	NA	NA	NA	NA	NA	NA	YES	NA	NA	NA	NA	NA
	757	GSE120741	P511T	P511T	PRIMARY	NA	NA	NA	NA	NA	NA	Poly(A+)	PROSTATE	NA	NA	NA	NA	NA	NA	NA	NO	NA	NA	NA	NA	NA
	758	GSE120741	P513T	P513T	PRIMARY	NA	NA	NA	NA	NA	NA	Poly(A+)	PROSTATE	NA	NA	NA	NA	NA	NA	NA	NO	NA	NA	NA	NA	NA
	759	GSE120741	P541T	P541T	PRIMARY	NA	NA	NA	NA	NA	NA	Poly(A+)	PROSTATE	NA	NA	NA	NA	NA	NA	NA	NO	NA	NA	NA	NA	NA
	760	GSE120741	P544T	P544T	PRIMARY	NA	NA	NA	NA	NA	NA	Poly(A+)	PROSTATE	NA	NA	NA	NA	NA	NA	NA	NO	NA	NA	NA	NA	NA
	761	GSE120741	P552T	P552T	PRIMARY	NA	NA	NA	NA	NA	NA	Poly(A+)	PROSTATE	NA	NA	NA	NA	NA	NA	NA	YES	NA	NA	NA	NA	NA
	762	GSE120741	P560T	P560T	PRIMARY	NA	NA	NA	NA	NA	NA	Poly(A+)	PROSTATE	NA	NA	NA	NA	NA	NA	NA	NO	NA	NA	NA	NA	NA
	763	GSE120741	P230T	P230T	PRIMARY	NA	NA	NA	NA	NA	NA	Poly(A+)	PROSTATE	NA	NA	NA	NA	NA	NA	NA	YES	NA	NA	NA	NA	NA
	764	GSE120741	P254T	P254T	PRIMARY	NA	NA	NA	NA	NA	NA	Poly(A+)	PROSTATE	NA	NA	NA	NA	NA	NA	NA	NA	NA	NA	NA	NA	NA
	765	GSE120741	P263T	P263T	PRIMARY	NA	NA	NA	NA	NA	NA	Poly(A+)	PROSTATE	NA	NA	NA	NA	NA	NA	NA	NO	NA	NA	NA	NA	NA
	766	GSE120741	P265T	P265T	PRIMARY	NA	NA	NA	NA	NA	NA	Poly(A+)	PROSTATE	NA	NA	NA	NA	NA	NA	NA	YES	NA	NA	NA	NA	NA
	767	GSE120741	P272T	P272T	PRIMARY	NA	NA	NA	NA	NA	NA	Poly(A+)	PROSTATE	NA	NA	NA	NA	NA	NA	NA	NO	NA	NA	NA	NA	NA
	768	GSE120741	P274T	P274T	PRIMARY	NA	NA	NA	NA	NA	NA	Poly(A+)	PROSTATE	NA	NA	NA	NA	NA	NA	NA	YES	NA	NA	NA	NA	NA
	769	GSE120741	P279T	P279T	PRIMARY	NA	NA	NA	NA	NA	NA	Poly(A+)	PROSTATE	NA	NA	NA	NA	NA	NA	NA	NO	NA	NA	NA	NA	NA
	770	GSE120741	P262T	P262T	PRIMARY	NA	NA	NA	NA	NA	NA	Poly(A+)	PROSTATE	NA	NA	NA	NA	NA	NA	NA	NO	NA	NA	NA	NA	NA
	771	GSE120741	P266T	P266T	PRIMARY	NA	NA	NA	NA	NA	NA	Poly(A+)	PROSTATE	NA	NA	NA	NA	NA	NA	NA	NO	NA	NA	NA	NA	NA
	772	GSE120741	P527T	P527T	PRIMARY	NA	NA	NA	NA	NA	NA	Poly(A+)	PROSTATE	NA	NA	NA	NA	NA	NA	NA	YES	NA	NA	NA	NA	NA
	773	PRJNA477449	Pat30	N0_190T	PRIMARY	NA	NA	64	6	7	NA	Poly(A+)	PROSTATE	NA	NA	NA	NEGATIVE	N0	T3b	NA	NA	NA	not_fused	NA	NA	NA
	774	PRJNA477449	Pat29	N0_186T	PRIMARY	NA	NA	61	11	8	NA	Poly(A+)	PROSTATE	NA	NA	NA	NEGATIVE	N0	T3a	NA	NA	NA	not_fused	NA	NA	NA
	775	PRJNA477449	Pat28	N0_185T	PRIMARY	NA	NA	59	7.3	7	NA	Poly(A+)	PROSTATE	NA	NA	NA	NEGATIVE	N0	T3b	NA	NA	NA	fused	NA	NA	NA
	776	PRJNA477449	Pat27	N0_182T	PRIMARY	NA	NA	56	27.6	9	NA	Poly(A+)	PROSTATE	NA	NA	NA	NEGATIVE	N0	T3a	NA	NA	NA	not_fused	NA	NA	NA
	777	PRJNA477449	Pat26	N0_179T	PRIMARY	NA	NA	66	16.5	9	NA	Poly(A+)	PROSTATE	NA	NA	NA	NEGATIVE	N0	T3a	NA	NA	NA	not_fused	NA	NA	NA
	778	PRJNA477449	Pat25	N0_172T	PRIMARY	NA	NA	62	5.6	6	NA	Poly(A+)	PROSTATE	NA	NA	NA	NEGATIVE	N0	T3?	NA	NA	NA	not_fused	NA	NA	NA
	779	PRJNA477449	Pat24	N0_170T_r	PRIMARY	NA	NA	68	21	9	NA	Poly(A+)	PROSTATE	NA	NA	NA	NEGATIVE	N0	T3a	NA	NA	NA	fused	NA	NA	NA
	780	PRJNA477449	Pat23	N0_153T	PRIMARY	NA	NA	57	12.1	7	NA	Poly(A+)	PROSTATE	NA	NA	NA	NEGATIVE	N0	T3b	NA	NA	NA	not_fused	NA	NA	NA
	781	PRJNA477449	Pat22	N0_144T	PRIMARY	NA	NA	51	19	7	NA	Poly(A+)	PROSTATE	NA	NA	NA	NEGATIVE	N0	T3a	NA	NA	NA	not_fused	NA	NA	NA
	782	PRJNA477449	Pat21	N0_143T	PRIMARY	NA	NA	60	14.5	7	NA	Poly(A+)	PROSTATE	NA	NA	NA	NEGATIVE	N0	T3a	NA	NA	NA	not_fused	NA	NA	NA
	783	PRJNA477449	Pat9	N0_70T	PRIMARY	NA	NA	66	6.63	7	NA	Poly(A+)	PROSTATE	NA	NA	NA	NEGATIVE	N0	?3b	NA	NA	NA	not_fused	NA	NA	NA
	784	PRJNA477449	Pat10	N0_74T	PRIMARY	NA	NA	66	5.1	6	NA	Poly(A+)	PROSTATE	NA	NA	NA	NEGATIVE	N0	?3a	NA	NA	NA	not_fused	NA	NA	NA
	785	PRJNA477449	Pat7	N0_54T_r	PRIMARY	NA	NA	46	4.6	6	NA	Poly(A+)	PROSTATE	NA	NA	NA	NEGATIVE	N0	?3b	NA	NA	NA	not_fused	NA	NA	NA
	786	PRJNA477449	Pat8	N0_63T	PRIMARY	NA	NA	65	11.6	7	NA	Poly(A+)	PROSTATE	NA	NA	NA	NEGATIVE	N0	?3?	NA	NA	NA	fused	NA	NA	NA
	787	PRJNA477449	Pat3	N0_6T	PRIMARY	NA	NA	58	17.7	8	NA	Poly(A+)	PROSTATE	NA	NA	NA	NEGATIVE	N0	?3b	NA	NA	NA	not_fused	NA	NA	NA
	788	PRJNA477449	Pat4	N0_12T	PRIMARY	NA	NA	74	16	7	NA	Poly(A+)	PROSTATE	NA	NA	NA	NEGATIVE	N0	?3?	NA	NA	NA	fused	NA	NA	NA
	789	PRJNA477449	Pat1	N0_4T	PRIMARY	NA	NA	57	6	7	NA	Poly(A+)	PROSTATE	NA	NA	NA	NEGATIVE	N0	?3b	NA	NA	NA	not_fused	NA	NA	NA
	790	PRJNA477449	Pat2	N0_5T_r	PRIMARY	NA	NA	73	10.6	8	NA	Poly(A+)	PROSTATE	NA	NA	NA	NEGATIVE	N0	?3?	NA	NA	NA	fused	NA	NA	NA
	791	PRJNA477449	Pat17	N0_104T	PRIMARY	NA	NA	70	4	7	NA	Poly(A+)	PROSTATE	NA	NA	NA	NEGATIVE	N0	?3?	NA	NA	NA	not_fused	NA	NA	NA
	792	PRJNA477449	Pat18	N0_109T	PRIMARY	NA	NA	60	20	8	NA	Poly(A+)	PROSTATE	NA	NA	NA	NEGATIVE	N0	?3?	NA	NA	NA	not_fused	NA	NA	NA
	793	PRJNA477449	Pat15	N0_95T	PRIMARY	NA	NA	63	7.27	7	NA	Poly(A+)	PROSTATE	NA	NA	NA	NEGATIVE	N0	?3?	NA	NA	NA	fused	NA	NA	NA
	794	PRJNA477449	Pat16	N0_102T	PRIMARY	NA	NA	68	10.94	7	NA	Poly(A+)	PROSTATE	NA	NA	NA	NEGATIVE	N0	?3?	NA	NA	NA	not_fused	NA	NA	NA
	795	PRJNA477449	Pat13	N0_85T	PRIMARY	NA	NA	65	19	6	NA	Poly(A+)	PROSTATE	NA	NA	NA	NEGATIVE	N0	?3?	NA	NA	NA	not_fused	NA	NA	NA
	796	PRJNA477449	Pat14	N0_88T	PRIMARY	NA	NA	59	8.59	7	NA	Poly(A+)	PROSTATE	NA	NA	NA	NEGATIVE	N0	?3?	NA	NA	NA	not_fused	NA	NA	NA
	797	PRJNA477449	Pat11	N0_79T	PRIMARY	NA	NA	57	24	7	NA	Poly(A+)	PROSTATE	NA	NA	NA	NEGATIVE	N0	T3a	NA	NA	NA	not_fused	NA	NA	NA
	798	PRJNA477449	Pat12	N0_80T	PRIMARY	NA	NA	66	21.8	7	NA	Poly(A+)	PROSTATE	NA	NA	NA	NEGATIVE	N0	?3?	NA	NA	NA	not_fused	NA	NA	NA
	799	PRJNA477449	Pat31	N0_203T	PRIMARY	NA	NA	64	23	8	NA	Poly(A+)	PROSTATE	NA	NA	NA	NEGATIVE	N0	T3a	NA	NA	NA	not_fused	NA	NA	NA
	800	PRJNA477449	Pat32	N0_206T	PRIMARY	NA	NA	69	15.6	7	NA	Poly(A+)	PROSTATE	NA	NA	NA	NEGATIVE	N0	?3?	NA	NA	NA	not_fused	NA	NA	NA
	801	PRJNA477449	Pat33	N0_221T	PRIMARY	NA	NA	65	5.97	7	NA	Poly(A+)	PROSTATE	NA	NA	NA	NEGATIVE	N0	?3b	NA	NA	NA	not_fused	NA	NA	NA
	802	PRJNA477449	Pat19	N0_114T	PRIMARY	NA	NA	70	8.1	6	NA	Poly(A+)	PROSTATE	NA	NA	NA	NEGATIVE	N0	T3b	NA	NA	NA	fused	NA	NA	NA
	803	PRJNA477449	Pat20	N0_138T	PRIMARY	NA	NA	62	24	7	NA	Poly(A+)	PROSTATE	NA	NA	NA	NEGATIVE	N0	T3b	NA	NA	NA	not_fused	NA	NA	NA
	804	PRJEB21092	V12	611LT	PRIMARY	NA	NA	65	24.1	7	NA	TotalRNA	PROSTATE	NA	NA	NA	POSITIVE	NA	T3c	T2b	NA	NA	NA	NA	NA	NA
	805	PRJEB21092	V12	611LT	PRIMARY	NA	NA	65	24.1	7	NA	TotalRNA	PROSTATE	NA	NA	NA	POSITIVE	NA	T3c	T2b	NA	NA	NA	NA	NA	NA
	806	PRJEB21092	V13	867RP	PRIMARY	NA	NA	63	15	7	NA	TotalRNA	PROSTATE	NA	NA	NA	POSITIVE	NA	T2c	T2b	NA	NA	NA	NA	NA	NA
	807	PRJEB21092	V13	867RP	PRIMARY	NA	NA	63	15	7	NA	TotalRNA	PROSTATE	NA	NA	NA	POSITIVE	NA	T2c	T2b	NA	NA	NA	NA	NA	NA
	808	PRJEB21092	V14	924LP	PRIMARY	NA	NA	51	19.7	10	NA	TotalRNA	PROSTATE	NA	NA	NA	POSITIVE	NA	T3a	T2a	NA	NA	NA	NA	NA	NA
	809	PRJEB21092	V14	924LP	PRIMARY	NA	NA	51	19.7	10	NA	TotalRNA	PROSTATE	NA	NA	NA	POSITIVE	NA	T3a	T2a	NA	NA	NA	NA	NA	NA
	810	PRJEB21092	V15	1039LP	PRIMARY	NA	NA	59	27.5	7	NA	TotalRNA	PROSTATE	NA	NA	NA	POSITIVE	NA	T2c	T2b	NA	NA	NA	NA	NA	NA
	811	PRJEB21092	V15	1039LP	PRIMARY	NA	NA	59	27.5	7	NA	TotalRNA	PROSTATE	NA	NA	NA	POSITIVE	NA	T2c	T2b	NA	NA	NA	NA	NA	NA
	812	PRJEB21092	V16	1045LP	PRIMARY	NA	NA	65	8.8	9	NA	TotalRNA	PROSTATE	NA	NA	NA	NEGATIVE	NA	T3b	T2c	NA	NA	NA	NA	NA	NA
	813	PRJEB21092	V16	1045LP	PRIMARY	NA	NA	65	8.8	9	NA	TotalRNA	PROSTATE	NA	NA	NA	NEGATIVE	NA	T3b	T2c	NA	NA	NA	NA	NA	NA
	814	PRJEB21092	V18	1095LP	PRIMARY	NA	NA	56	7.9	9	NA	TotalRNA	PROSTATE	NA	NA	NA	NEGATIVE	NA	T3a	T1c	NA	NA	NA	NA	NA	NA
	815	PRJEB21092	V18	1095LP	PRIMARY	NA	NA	56	7.9	9	NA	TotalRNA	PROSTATE	NA	NA	NA	NEGATIVE	NA	T3a	T1c	NA	NA	NA	NA	NA	NA
	816	PRJEB21092	V19	1136RP	PRIMARY	NA	NA	56	5.2	9	NA	TotalRNA	PROSTATE	NA	NA	NA	NEGATIVE	NA	T3b	T1c	NA	NA	NA	NA	NA	NA
	817	PRJEB21092	V19	1136RP	PRIMARY	NA	NA	56	5.2	9	NA	TotalRNA	PROSTATE	NA	NA	NA	NEGATIVE	NA	T3b	T1c	NA	NA	NA	NA	NA	NA
	818	PRJEB21092	V20	1135RP	PRIMARY	NA	NA	73	11.15	9	NA	TotalRNA	PROSTATE	NA	NA	NA	POSITIVE	NA	T2c	T2a	NA	NA	NA	NA	NA	NA
	819	PRJEB21092	V20	1135RP	PRIMARY	NA	NA	73	11.15	9	NA	TotalRNA	PROSTATE	NA	NA	NA	POSITIVE	NA	T2c	T2a	NA	NA	NA	NA	NA	NA
	820	PRJEB21092	V21	703LP	PRIMARY	NA	NA	71	0.86	7	NA	TotalRNA	PROSTATE	NA	NA	NA	NEGATIVE	NA	T3a	T2a	NA	NA	NA	NA	NA	NA
	821	PRJEB21092	V21	703LP	PRIMARY	NA	NA	71	0.86	7	NA	TotalRNA	PROSTATE	NA	NA	NA	NEGATIVE	NA	T3a	T2a	NA	NA	NA	NA	NA	NA
	822	PRJEB21092	V22	482RT	PRIMARY	NA	NA	65	15	7	NA	TotalRNA	PROSTATE	NA	NA	NA	POSITIVE	NA	T2c	T1c	YES	NA	NA	NA	NA	NA
	823	PRJEB21092	V22	482RT	PRIMARY	NA	NA	65	15	7	NA	TotalRNA	PROSTATE	NA	NA	NA	POSITIVE	NA	T2c	T1c	YES	NA	NA	NA	NA	NA
	824	PRJEB21092	V23	601RP	PRIMARY	NA	NA	60	5.1	7	NA	TotalRNA	PROSTATE	NA	NA	NA	POSITIVE	NA	T3b	T2a	NA	NA	NA	NA	NA	NA
	825	PRJEB21092	V23	601RP	PRIMARY	NA	NA	60	5.1	7	NA	TotalRNA	PROSTATE	NA	NA	NA	POSITIVE	NA	T3b	T2a	NA	NA	NA	NA	NA	NA
	826	PRJEB21092	V24	1046LP	PRIMARY	NA	NA	73	10	9	NA	TotalRNA	PROSTATE	NA	NA	NA	NEGATIVE	NA	T3b	T3	YES	NA	NA	NA	NA	NA
	827	PRJEB21092	V24	1046LP	PRIMARY	NA	NA	73	10	9	NA	TotalRNA	PROSTATE	NA	NA	NA	NEGATIVE	NA	T3b	T3	YES	NA	NA	NA	NA	NA
	828	PRJEB21092	V25	1056LP	PRIMARY	NA	NA	65	5.19	9	NA	TotalRNA	PROSTATE	NA	NA	NA	POSITIVE	NA	T3a	T1c	NA	NA	NA	NA	NA	NA
	829	PRJEB21092	V25	1056LP	PRIMARY	NA	NA	65	5.19	9	NA	TotalRNA	PROSTATE	NA	NA	NA	POSITIVE	NA	T3a	T1c	NA	NA	NA	NA	NA	NA
	830	PRJEB21092	V26	1067RT	PRIMARY	NA	NA	74	26	7	NA	TotalRNA	PROSTATE	NA	NA	NA	POSITIVE	NA	T3a	T3	YES	NA	NA	NA	NA	NA
	831	PRJEB21092	V26	1067RT	PRIMARY	NA	NA	74	26	7	NA	TotalRNA	PROSTATE	NA	NA	NA	POSITIVE	NA	T3a	T3	YES	NA	NA	NA	NA	NA
	832	PRJEB21092	V27	1078LP	PRIMARY	NA	NA	72	5.8	9	NA	TotalRNA	PROSTATE	NA	NA	NA	POSITIVE	NA	T3b	T2a	NA	NA	NA	NA	NA	NA
	833	PRJEB21092	V27	1078LP	PRIMARY	NA	NA	72	5.8	9	NA	TotalRNA	PROSTATE	NA	NA	NA	POSITIVE	NA	T3b	T2a	NA	NA	NA	NA	NA	NA
	834	PRJEB21092	V28	1085LT	PRIMARY	NA	NA	65	7.9	9	NA	TotalRNA	PROSTATE	NA	NA	NA	POSITIVE	NA	T3a	T2a	YES	NA	NA	NA	NA	NA
	835	PRJEB21092	V28	1085LT	PRIMARY	NA	NA	65	7.9	9	NA	TotalRNA	PROSTATE	NA	NA	NA	POSITIVE	NA	T3a	T2a	YES	NA	NA	NA	NA	NA
	836	PRJEB21092	V29	1101RT	PRIMARY	NA	NA	67	7.1	9	NA	TotalRNA	PROSTATE	NA	NA	NA	POSITIVE	NA	T3b	T2b	NA	NA	NA	NA	NA	NA
	837	PRJEB21092	V29	1101RT	PRIMARY	NA	NA	67	7.1	9	NA	TotalRNA	PROSTATE	NA	NA	NA	POSITIVE	NA	T3b	T2b	NA	NA	NA	NA	NA	NA
	838	PRJEB21092	V30	1108LP	PRIMARY	NA	NA	64	12	9	NA	TotalRNA	PROSTATE	NA	NA	NA	NEGATIVE	NA	T3b	T2a	NA	NA	NA	NA	NA	NA
	839	PRJEB21092	V30	1108LP	PRIMARY	NA	NA	64	12	9	NA	TotalRNA	PROSTATE	NA	NA	NA	NEGATIVE	NA	T3b	T2a	NA	NA	NA	NA	NA	NA
	840	PRJEB21092	V32	997RP	PRIMARY	NA	NA	68	12	8	NA	TotalRNA	PROSTATE	NA	NA	NA	POSITIVE	NA	T2c	T2a	NA	NA	NA	NA	NA	NA
	841	PRJEB21092	V32	997RP	PRIMARY	NA	NA	68	12	8	NA	TotalRNA	PROSTATE	NA	NA	NA	POSITIVE	NA	T2c	T2a	NA	NA	NA	NA	NA	NA
	842	PRJEB21092	V33	1036LP	PRIMARY	NA	NA	70	4.1	8	NA	TotalRNA	PROSTATE	NA	NA	NA	NEGATIVE	NA	T2c	T2a	YES	NA	NA	NA	NA	NA
	843	PRJEB21092	V33	1036LP	PRIMARY	NA	NA	70	4.1	8	NA	TotalRNA	PROSTATE	NA	NA	NA	NEGATIVE	NA	T2c	T2a	YES	NA	NA	NA	NA	NA
	844	PRJEB21092	V34	686RP	PRIMARY	NA	NA	64	5.2	6	NA	TotalRNA	PROSTATE	NA	NA	NA	NEGATIVE	NA	T2c	T2a	NA	NA	NA	NA	NA	NA
	845	PRJEB21092	V34	686RP	PRIMARY	NA	NA	64	5.2	6	NA	TotalRNA	PROSTATE	NA	NA	NA	NEGATIVE	NA	T2c	T2a	NA	NA	NA	NA	NA	NA
	846	PRJEB21092	V35	537RP	PRIMARY	NA	NA	60	4.4	6	NA	TotalRNA	PROSTATE	NA	NA	NA	NEGATIVE	NA	T2a	T1c	NA	NA	NA	NA	NA	NA
	847	PRJEB21092	V35	537RP	PRIMARY	NA	NA	60	4.4	6	NA	TotalRNA	PROSTATE	NA	NA	NA	NEGATIVE	NA	T2a	T1c	NA	NA	NA	NA	NA	NA
	848	PRJEB21092	V36	481RP	PRIMARY	NA	NA	62	6.2	5	NA	TotalRNA	PROSTATE	NA	NA	NA	NEGATIVE	NA	T2c	T1c	NA	NA	NA	NA	NA	NA
	849	PRJEB21092	V36	481RP	PRIMARY	NA	NA	62	6.2	5	NA	TotalRNA	PROSTATE	NA	NA	NA	NEGATIVE	NA	T2c	T1c	NA	NA	NA	NA	NA	NA
	850	PRJEB21092	V37	452LP	PRIMARY	NA	NA	67	4.1	6	NA	TotalRNA	PROSTATE	NA	NA	NA	NEGATIVE	NA	T2c	T2a	NA	NA	NA	NA	NA	NA
	851	PRJEB21092	V37	452LP	PRIMARY	NA	NA	67	4.1	6	NA	TotalRNA	PROSTATE	NA	NA	NA	NEGATIVE	NA	T2c	T2a	NA	NA	NA	NA	NA	NA
	852	PRJEB21092	V38	420LP	PRIMARY	NA	NA	58	5.8	6	NA	TotalRNA	PROSTATE	NA	NA	NA	NEGATIVE	NA	T2c	T2a	NA	NA	NA	NA	NA	NA
	853	PRJEB21092	V38	420LP	PRIMARY	NA	NA	58	5.8	6	NA	TotalRNA	PROSTATE	NA	NA	NA	NEGATIVE	NA	T2c	T2a	NA	NA	NA	NA	NA	NA
	854	PRJEB21092	V39	419LP	PRIMARY	NA	NA	NA	5.34	5	NA	TotalRNA	PROSTATE	NA	NA	NA	NEGATIVE	NA	T2c	T1c	NA	NA	NA	NA	NA	NA
	855	PRJEB21092	V39	419LP	PRIMARY	NA	NA	NA	5.34	5	NA	TotalRNA	PROSTATE	NA	NA	NA	NEGATIVE	NA	T2c	T1c	NA	NA	NA	NA	NA	NA
	856	PRJEB21092	V40	302LP	PRIMARY	NA	NA	60	5.1	6	NA	TotalRNA	PROSTATE	NA	NA	NA	NEGATIVE	NA	T3a	T1c	NA	NA	NA	NA	NA	NA
	857	PRJEB21092	V40	302LP	PRIMARY	NA	NA	60	5.1	6	NA	TotalRNA	PROSTATE	NA	NA	NA	NEGATIVE	NA	T3a	T1c	NA	NA	NA	NA	NA	NA
	858	PRJEB21092	V41	422RP	PRIMARY	NA	NA	56	6.1	6	NA	TotalRNA	PROSTATE	NA	NA	NA	NEGATIVE	NA	T2c	T1c	NA	NA	NA	NA	NA	NA
	859	PRJEB21092	V41	422RP	PRIMARY	NA	NA	56	6.1	6	NA	TotalRNA	PROSTATE	NA	NA	NA	NEGATIVE	NA	T2c	T1c	NA	NA	NA	NA	NA	NA
	860	PRJEB21092	V42	531RP	PRIMARY	NA	NA	60	5.13	6	NA	TotalRNA	PROSTATE	NA	NA	NA	POSITIVE	NA	T2c	T2a	NA	NA	NA	NA	NA	NA
	861	PRJEB21092	V42	531RP	PRIMARY	NA	NA	60	5.13	6	NA	TotalRNA	PROSTATE	NA	NA	NA	POSITIVE	NA	T2c	T2a	NA	NA	NA	NA	NA	NA
	862	PRJEB21092	V43	239LP	PRIMARY	NA	NA	50	5.9	6	NA	TotalRNA	PROSTATE	NA	NA	NA	NEGATIVE	NA	T2c	T2a	NA	NA	NA	NA	NA	NA
	863	PRJEB21092	V43	239LP	PRIMARY	NA	NA	50	5.9	6	NA	TotalRNA	PROSTATE	NA	NA	NA	NEGATIVE	NA	T2c	T2a	NA	NA	NA	NA	NA	NA
	864	PRJEB21092	V44	261RP	PRIMARY	NA	NA	70	4.6	6	NA	TotalRNA	PROSTATE	NA	NA	NA	NEGATIVE	NA	T2c	T2a	NA	NA	NA	NA	NA	NA
	865	PRJEB21092	V44	261RP	PRIMARY	NA	NA	70	4.6	6	NA	TotalRNA	PROSTATE	NA	NA	NA	NEGATIVE	NA	T2c	T2a	NA	NA	NA	NA	NA	NA
	866	PRJEB21092	V45	242LP	PRIMARY	NA	NA	52	3.1	6	NA	TotalRNA	PROSTATE	NA	NA	NA	NEGATIVE	NA	T3a	T1c	NA	NA	NA	NA	NA	NA
	867	PRJEB21092	V45	242LP	PRIMARY	NA	NA	52	3.1	6	NA	TotalRNA	PROSTATE	NA	NA	NA	NEGATIVE	NA	T3a	T1c	NA	NA	NA	NA	NA	NA
	868	PRJEB21092	V46	597RP	PRIMARY	NA	NA	65	3.81	6	NA	TotalRNA	PROSTATE	NA	NA	NA	NEGATIVE	NA	T3a	T2a	NA	NA	NA	NA	NA	NA
	869	PRJEB21092	V46	597RP	PRIMARY	NA	NA	65	3.81	6	NA	TotalRNA	PROSTATE	NA	NA	NA	NEGATIVE	NA	T3a	T2a	NA	NA	NA	NA	NA	NA
	870	PRJEB21092	V47	494LP	PRIMARY	NA	NA	58	7.57	6	NA	TotalRNA	PROSTATE	NA	NA	NA	NEGATIVE	NA	T2c	T1c	NA	NA	NA	NA	NA	NA
	871	PRJEB21092	V47	494LP	PRIMARY	NA	NA	58	7.57	6	NA	TotalRNA	PROSTATE	NA	NA	NA	NEGATIVE	NA	T2c	T1c	NA	NA	NA	NA	NA	NA
	872	PRJEB21092	V48	647RP	PRIMARY	NA	NA	69	5.66	6	NA	TotalRNA	PROSTATE	NA	NA	NA	POSITIVE	NA	T2c	T2a	NA	NA	NA	NA	NA	NA
	873	PRJEB21092	V48	647RP	PRIMARY	NA	NA	69	5.66	6	NA	TotalRNA	PROSTATE	NA	NA	NA	POSITIVE	NA	T2c	T2a	NA	NA	NA	NA	NA	NA
	874	PRJEB21092	V49	731LT	PRIMARY	NA	NA	NA	NA	6	NA	TotalRNA	PROSTATE	NA	NA	NA	NEGATIVE	NA	T3a	NA	NA	NA	NA	NA	NA	NA
	875	PRJEB21092	V49	731LT	PRIMARY	NA	NA	NA	NA	6	NA	TotalRNA	PROSTATE	NA	NA	NA	NEGATIVE	NA	T3a	NA	NA	NA	NA	NA	NA	NA
	876	PRJEB21092	V50	761RT	PRIMARY	NA	NA	61	NA	6	NA	TotalRNA	PROSTATE	NA	NA	NA	NEGATIVE	NA	T2c	T1c	NA	NA	NA	NA	NA	NA
	877	PRJEB21092	V50	761RT	PRIMARY	NA	NA	61	NA	6	NA	TotalRNA	PROSTATE	NA	NA	NA	NEGATIVE	NA	T2c	T1c	NA	NA	NA	NA	NA	NA
	878	PRJEB21092	V51	427LT	PRIMARY	NA	NA	49	5.41	6	NA	TotalRNA	PROSTATE	NA	NA	NA	NEGATIVE	NA	T2c	T2a	NA	NA	NA	NA	NA	NA
	879	PRJEB21092	V51	427LT	PRIMARY	NA	NA	49	5.41	6	NA	TotalRNA	PROSTATE	NA	NA	NA	NEGATIVE	NA	T2c	T2a	NA	NA	NA	NA	NA	NA
	880	PRJEB21092	V52	308LT2	PRIMARY	NA	NA	67	5.6	5	NA	TotalRNA	PROSTATE	NA	NA	NA	NEGATIVE	NA	T2c	T1c	NA	NA	NA	NA	NA	NA
	881	PRJEB21092	V52	308LT2	PRIMARY	NA	NA	67	5.6	5	NA	TotalRNA	PROSTATE	NA	NA	NA	NEGATIVE	NA	T2c	T1c	NA	NA	NA	NA	NA	NA
	882	PRJEB21092	V53	627RT	PRIMARY	NA	NA	70	1.7	6	NA	TotalRNA	PROSTATE	NA	NA	NA	NEGATIVE	NA	T2a	T1c	NA	NA	NA	NA	NA	NA
	883	PRJEB21092	V53	627RT	PRIMARY	NA	NA	70	1.7	6	NA	TotalRNA	PROSTATE	NA	NA	NA	NEGATIVE	NA	T2a	T1c	NA	NA	NA	NA	NA	NA
	884	PRJEB21092	V54	243LP	PRIMARY	NA	NA	59	3.6	6	NA	TotalRNA	PROSTATE	NA	NA	NA	NEGATIVE	NA	T2a	T2a	NA	NA	NA	NA	NA	NA
	885	PRJEB21092	V54	243LP	PRIMARY	NA	NA	59	3.6	6	NA	TotalRNA	PROSTATE	NA	NA	NA	NEGATIVE	NA	T2a	T2a	NA	NA	NA	NA	NA	NA
	886	PRJEB21092	V55	278RP	PRIMARY	NA	NA	58	4.4	5	NA	TotalRNA	PROSTATE	NA	NA	NA	NEGATIVE	NA	T2c	T2a	NA	NA	NA	NA	NA	NA
	887	PRJEB21092	V55	278RP	PRIMARY	NA	NA	58	4.4	5	NA	TotalRNA	PROSTATE	NA	NA	NA	NEGATIVE	NA	T2c	T2a	NA	NA	NA	NA	NA	NA
	888	PRJEB21092	V56	412RP	PRIMARY	NA	NA	50	5.3	6	NA	TotalRNA	PROSTATE	NA	NA	NA	NEGATIVE	NA	T3b	T1c	NA	NA	NA	NA	NA	NA
	889	PRJEB21092	V56	412RP	PRIMARY	NA	NA	50	5.3	6	NA	TotalRNA	PROSTATE	NA	NA	NA	NEGATIVE	NA	T3b	T1c	NA	NA	NA	NA	NA	NA
	890	PRJEB21092	V1	1022_1	CRPC	NA	NA	57	100	6	NA	TotalRNA	NA	NA	NA	NA	NA	NA	NA	NA	NA	NA	NA	NA	NA	NA
	891	PRJEB21092	V1	1022_1	CRPC	NA	NA	57	100	6	NA	TotalRNA	NA	NA	NA	NA	NA	NA	NA	NA	NA	NA	NA	NA	NA	NA
	892	PRJEB21092	V2	933LP-LN_2	CRPC	NA	NA	64	NA	7	NA	TotalRNA	NA	NA	NA	NA	NEGATIVE	NA	T4	T2b	NA	NA	NA	NA	NA	NA
	893	PRJEB21092	V2	933LP-LN_2	CRPC	NA	NA	64	NA	7	NA	TotalRNA	NA	NA	NA	NA	NEGATIVE	NA	T4	T2b	NA	NA	NA	NA	NA	NA
	894	PRJEB21092	V3	1065RT	CRPC	NA	NA	51	43	6	NA	TotalRNA	NA	NA	NA	NA	POSITIVE	NA	T4	T2c	NA	NA	NA	NA	NA	NA
	895	PRJEB21092	V3	1065RT	CRPC	NA	NA	51	43	6	NA	TotalRNA	NA	NA	NA	NA	POSITIVE	NA	T4	T2c	NA	NA	NA	NA	NA	NA
	896	PRJEB21092	V4	1065RP-LN	CRPC	NA	NA	51	43	6	NA	TotalRNA	NA	NA	NA	NA	POSITIVE	NA	NA	T2c	NA	NA	NA	NA	NA	NA
	897	PRJEB21092	V4	1065RP-LN	CRPC	NA	NA	51	43	6	NA	TotalRNA	NA	NA	NA	NA	POSITIVE	NA	NA	T2c	NA	NA	NA	NA	NA	NA
	898	PRJEB21092	V5	1123_2	CRPC	NA	NA	75	360	9	NA	TotalRNA	NA	NA	NA	NA	NA	NA	T4	T3	NA	NA	NA	NA	NA	NA
	899	PRJEB21092	V5	1123_2	CRPC	NA	NA	75	360	9	NA	TotalRNA	NA	NA	NA	NA	NA	NA	T4	T3	NA	NA	NA	NA	NA	NA
	900	phs000915	MO_1128	MO_1128	CRPC	NA	59.7	71	7.7	7	NA	Poly(A+)	LYMPH_NODE	NA	NA	NA	NA	NA	NA	NA	NA	NA	not_fused	not_fused	not_fused	not_fused
	901	phs000915	MO_1013	MO_1013	CRPC	NA	50.1	55	20	8	NA	Poly(A+)	LYMPH_NODE	NA	NA	NA	NA	NA	NA	NA	NA	NA	not_fused	not_fused	not_fused	not_fused
	902	phs000915	MO_1014	MO_1014	CRPC	NA	61.1	65	8.3	8	NA	Poly(A+)	LYMPH_NODE	NA	NA	NA	NA	NA	NA	NA	NA	NA	not_fused	not_fused	not_fused	not_fused
	903	phs000915	MO_1020	MO_1020	CRPC	NA	60.7	63	6.6	8	NA	Poly(A+)	LIVER	NA	NA	NA	NA	NA	NA	NA	NA	NA	not_fused	not_fused	not_fused	not_fused
	904	phs000915	MO_1040	MO_1040	CRPC	NA	50.5	68.1	23.6	7	NA	Poly(A+)	LYMPH_NODE	NA	NA	NA	NA	NA	NA	NA	NA	NA	fused	not_fused	not_fused	not_fused
	905	phs000915	MO_1054	MO_1054	CRPC	NA	44.8	56	9.1	9	NA	Poly(A+)	PROSTATE	NA	NA	NA	NA	NA	NA	NA	NA	NA	not_fused	not_fused	not_fused	fused
	906	phs000915	MO_1071	MO_1071	CRPC	NA	49.2	54	2.8	7	NA	Poly(A+)	PROSTATE	NA	NA	NA	NA	NA	NA	NA	NA	NA	fused	not_fused	not_fused	not_fused
	907	phs000915	MO_1074	MO_1074	CRPC	NA	58.2	69	NA	7	NA	Poly(A+)	BONE	NA	NA	NA	NA	NA	NA	NA	NA	NA	not_fused	not_fused	not_fused	not_fused
	908	phs000915	MO_1084	MO_1084	CRPC	NA	63.1	77	NA	6	NA	Poly(A+)	LYMPH_NODE	NA	NA	NA	NA	NA	NA	NA	NA	NA	fused	not_fused	not_fused	not_fused
	909	phs000915	MO_1094	MO_1094	CRPC	NA	66.2	67	2.4	9	NA	Poly(A+)	BONE	NA	NA	NA	NA	NA	NA	NA	NA	NA	not_fused	not_fused	not_fused	not_fused
	910	phs000915	MO_1095	MO_1095	CRPC	NA	69.8	71.9	48.6	9	NA	Poly(A+)	THORACIC_EPIDURAL	NA	NA	NA	NA	NA	NA	NA	NA	NA	fused	not_fused	not_fused	not_fused
	911	phs000915	TP_2001	TP_2001	CRPC	NA	NA	70	203.8	9	NA	Poly(A+)	LYMPH_NODE	NA	NA	NA	NA	NA	NA	NA	NA	NA	fused	not_fused	not_fused	not_fused
	912	phs000915	TP_2009	TP_2009	CRPC	NA	NA	58	2.8	9	NA	Poly(A+)	BONE	NA	NA	NA	NA	NA	NA	NA	NA	NA	not_fused	not_fused	not_fused	fused
	913	phs000915	TP_2010	TP_2010	CRPC	NA	NA	64	9.63	9	NA	Poly(A+)	LYMPH_NODE	NA	NA	NA	NA	NA	NA	NA	NA	NA	not_fused	not_fused	not_fused	not_fused
	914	phs000915	MO_1124	MO_1124	CRPC	NA	42.3	66	NA	NA	NA	Poly(A+)	BLADDER	NA	NA	NA	NA	NA	NA	NA	NA	NA	fused	not_fused	not_fused	not_fused
	915	phs000915	MO_1114	MO_1114	CRPC	NA	53.4	62	4.4	7	NA	Poly(A+)	LYMPH_NODE	NA	NA	NA	NA	NA	NA	NA	NA	NA	fused	not_fused	not_fused	not_fused
	916	phs000915	TP_2032	TP_2032	CRPC	NA	NA	74	15	9	NA	Poly(A+)	LYMPH_NODE	NA	NA	NA	NA	NA	NA	NA	NA	NA	not_fused	not_fused	not_fused	not_fused
	917	phs000915	TP_2020	TP_2020	CRPC	NA	NA	55	467	NA	NA	Poly(A+)	BONE	NA	NA	NA	NA	NA	NA	NA	NA	NA	not_fused	not_fused	not_fused	fused
	918	phs000915	MO_1192	MO_1192	CRPC	NA	55.7	62	20	8	NA	Poly(A+)	LYMPH_NODE	NA	NA	NA	NA	NA	NA	NA	NA	NA	fused	not_fused	not_fused	not_fused
	919	phs000915	MO_1179	MO_1179	CRPC	NA	70	75	3.75	9	NA	Poly(A+)	BONE	NA	NA	NA	NA	NA	NA	NA	NA	NA	fused	not_fused	not_fused	not_fused
	920	phs000915	MO_1184	MO_1184	CRPC	NA	67.1	71	NA	9	NA	Poly(A+)	LIVER	NA	NA	NA	NA	NA	NA	NA	NA	NA	not_fused	not_fused	not_fused	not_fused
	921	phs000915	MO_1215	MO_1215	CRPC	NA	53.9	65	5.5	7	NA	Poly(A+)	PERIRECTAL	NA	NA	NA	NA	NA	NA	NA	NA	NA	fused	not_fused	not_fused	not_fused
	922	phs000915	MO_1241	MO_1241	CRPC	NA	74.6	75	45.4	10	NA	Poly(A+)	LIVER	NA	NA	NA	NA	NA	NA	NA	NA	NA	fused	not_fused	not_fused	not_fused
	923	phs000915	MO_1176	MO_1176	CRPC	NA	55.2	55.3	NA	10	NA	Poly(A+)	LYMPH_NODE	NA	NA	NA	NA	NA	NA	NA	NA	NA	fused	not_fused	not_fused	not_fused
	924	phs000915	MO_1262	MO_1262	CRPC	NA	47.1	52.7	15.7	7	NA	Poly(A+)	LYMPH_NODE	NA	NA	NA	NA	NA	NA	NA	NA	NA	not_fused	not_fused	not_fused	fused
	925	phs000915	MO_1202	MO_1202	CRPC	NA	67.8	69.8	8.5	7	NA	Poly(A+)	LIVER	NA	NA	NA	NA	NA	NA	NA	NA	NA	fused	not_fused	not_fused	not_fused
	926	phs000915	MO_1221	MO_1221	CRPC	NA	50.1	58.5	362.7	9	NA	Poly(A+)	BONE	NA	NA	NA	NA	NA	NA	NA	NA	NA	not_fused	not_fused	not_fused	not_fused
	927	phs000915	MO_1232	MO_1232	CRPC	NA	60.7	64.6	4.86	9	NA	Poly(A+)	CHEST_WALL	NA	NA	NA	NA	NA	NA	NA	NA	NA	not_fused	not_fused	not_fused	not_fused
	928	phs000915	MO_1244	MO_1244	CRPC	NA	56.4	57.6	28.1	9	NA	Poly(A+)	LIVER	NA	NA	NA	NA	NA	NA	NA	NA	NA	fused	not_fused	not_fused	not_fused
	929	phs000915	MO_1249	MO_1249	CRPC	NA	50.3	69.6	NA	NA	NA	Poly(A+)	LYMPH_NODE	NA	NA	NA	NA	NA	NA	NA	NA	NA	fused	not_fused	not_fused	not_fused
	930	phs000915	MO_1219	MO_1219	CRPC	NA	65.9	67.5	16.3	7	NA	Poly(A+)	BONE	NA	NA	NA	NA	NA	NA	NA	NA	NA	not_fused	not_fused	not_fused	not_fused
	931	phs000915	TP_2054	TP_2054	CRPC	NA	NA	70.7	6	10	NA	Poly(A+)	LYMPH_NODE	NA	NA	NA	NA	NA	NA	NA	NA	NA	fused	not_fused	not_fused	not_fused
	932	phs000915	MO_1337	MO_1337	CRPC	NA	60.6	62	11.66	7	NA	Poly(A+)	LIVER	NA	NA	NA	NA	NA	NA	NA	NA	NA	fused	not_fused	not_fused	not_fused
	933	phs000915	MO_1316	MO_1316	CRPC	NA	54.8	70	4.7	6	NA	Poly(A+)	LYMPH_NODE	NA	NA	NA	NA	NA	NA	NA	NA	NA	fused	not_fused	not_fused	not_fused
	934	phs000915	MO_1118	MO_1118	CRPC	NA	69.5	73	8.14	9	NA	Poly(A+)	LIVER	NA	NA	NA	NA	NA	NA	NA	NA	NA	fused	not_fused	not_fused	not_fused
	935	phs000915	MO_1161	MO_1161	CRPC	NA	63.7	65	320	10	NA	Poly(A+)	LIVER	NA	NA	NA	NA	NA	NA	NA	NA	NA	fused	not_fused	not_fused	not_fused
	936	phs000915	MO_1336	MO_1336	CRPC	NA	57.6	75	NA	6	NA	Poly(A+)	BONE	NA	NA	NA	NA	NA	NA	NA	NA	NA	not_fused	not_fused	not_fused	not_fused
	937	phs000915	MO_1277	MO_1277	CRPC	NA	45.8	54	3.2	8	NA	Poly(A+)	BONE	NA	NA	NA	NA	NA	NA	NA	NA	NA	fused	not_fused	not_fused	not_fused
	938	phs000915	TP_2060	TP_2060	CRPC	NA	NA	72	29.4	10	NA	Poly(A+)	LYMPH_NODE	NA	NA	NA	NA	NA	NA	NA	NA	NA	not_fused	not_fused	not_fused	not_fused
	939	phs000915	MO_1339	MO_1339	CRPC	NA	77.1	78	19	8	NA	Poly(A+)	LYMPH_NODE	NA	NA	NA	NA	NA	NA	NA	NA	NA	not_fused	not_fused	not_fused	not_fused
	940	phs000915	TP_2061	TP_2061	CRPC	NA	NA	64.7	NA	9	NA	Poly(A+)	PELVIC_MASS	NA	NA	NA	NA	NA	NA	NA	NA	NA	not_fused	not_fused	not_fused	not_fused
	941	phs000915	TP_2064	TP_2064	CRPC	NA	NA	71	23	7	NA	Poly(A+)	LYMPH_NODE	NA	NA	NA	NA	NA	NA	NA	NA	NA	not_fused	not_fused	not_fused	not_fused
	942	phs000915	MO_1410	MO_1410	CRPC	NA	63.4	66	34.7	8	NA	Poly(A+)	LIVER	NA	NA	NA	NA	NA	NA	NA	NA	NA	fused	not_fused	not_fused	not_fused
	943	phs000915	MO_1008	MO_1008	CRPC	NA	44.5	47.9	1049.6	8	NA	Hybrid Capture	DURA	NA	NA	NA	NA	NA	NA	NA	NA	NA	not_fused	not_fused	not_fused	not_fused
	944	phs000915	MO_1084	MO_1084	CRPC	NA	63.1	77	NA	6	NA	Hybrid Capture	LYMPH_NODE	NA	NA	NA	NA	NA	NA	NA	NA	NA	fused	not_fused	not_fused	not_fused
	945	phs000915	MO_1094	MO_1094	CRPC	NA	66.2	67	2.4	9	NA	Hybrid Capture	BONE	NA	NA	NA	NA	NA	NA	NA	NA	NA	not_fused	not_fused	not_fused	not_fused
	946	phs000915	MO_1095	MO_1095	CRPC	NA	69.8	71.9	48.6	9	NA	Hybrid Capture	THORACIC_EPIDURAL	NA	NA	NA	NA	NA	NA	NA	NA	NA	fused	not_fused	not_fused	not_fused
	947	phs000915	MO_1114	MO_1114	CRPC	NA	53.4	62	4.4	7	NA	Hybrid Capture	LYMPH_NODE	NA	NA	NA	NA	NA	NA	NA	NA	NA	fused	not_fused	not_fused	not_fused
	948	phs000915	MO_1118	MO_1118	CRPC	NA	69.5	73	8.14	9	NA	Hybrid Capture	LIVER	NA	NA	NA	NA	NA	NA	NA	NA	NA	fused	not_fused	not_fused	not_fused
	949	phs000915	MO_1124	MO_1124	CRPC	NA	42.3	66	NA	NA	NA	Hybrid Capture	BLADDER	NA	NA	NA	NA	NA	NA	NA	NA	NA	fused	not_fused	not_fused	not_fused
	950	phs000915	MO_1130	MO_1130	CRPC	NA	52.5	56	19.3	7	NA	Hybrid Capture	BONE	NA	NA	NA	NA	NA	NA	NA	NA	NA	not_fused	not_fused	not_fused	not_fused
	951	phs000915	MO_1161	MO_1161	CRPC	NA	63.7	65	320	10	NA	Hybrid Capture	LIVER	NA	NA	NA	NA	NA	NA	NA	NA	NA	fused	not_fused	not_fused	not_fused
	952	phs000915	MO_1162	MO_1162	CRPC	NA	41.2	50	18.1	8	NA	Hybrid Capture	PERITONEAL	NA	NA	NA	NA	NA	NA	NA	NA	NA	not_fused	not_fused	not_fused	not_fused
	953	phs000915	MO_1176	MO_1176	CRPC	NA	55.2	55.3	NA	10	NA	Hybrid Capture	LYMPH_NODE	NA	NA	NA	NA	NA	NA	NA	NA	NA	fused	not_fused	not_fused	not_fused
	954	phs000915	MO_1179	MO_1179	CRPC	NA	70	75	3.75	9	NA	Hybrid Capture	BONE	NA	NA	NA	NA	NA	NA	NA	NA	NA	fused	not_fused	not_fused	not_fused
	955	phs000915	MO_1184	MO_1184	CRPC	NA	67.1	71	NA	9	NA	Hybrid Capture	LIVER	NA	NA	NA	NA	NA	NA	NA	NA	NA	not_fused	not_fused	not_fused	not_fused
	956	phs000915	MO_1192	MO_1192	CRPC	NA	55.7	62	20	8	NA	Hybrid Capture	LYMPH_NODE	NA	NA	NA	NA	NA	NA	NA	NA	NA	fused	not_fused	not_fused	not_fused
	957	phs000915	MO_1202	MO_1202	CRPC	NA	67.8	69.8	8.5	7	NA	Hybrid Capture	LIVER	NA	NA	NA	NA	NA	NA	NA	NA	NA	fused	not_fused	not_fused	not_fused
	958	phs000915	MO_1215	MO_1215	CRPC	NA	53.9	65	5.5	7	NA	Hybrid Capture	PERIRECTAL	NA	NA	NA	NA	NA	NA	NA	NA	NA	fused	not_fused	not_fused	not_fused
	959	phs000915	MO_1219	MO_1219	CRPC	NA	65.9	67.5	16.3	7	NA	Hybrid Capture	BONE	NA	NA	NA	NA	NA	NA	NA	NA	NA	not_fused	not_fused	not_fused	not_fused
	960	phs000915	MO_1221	MO_1221	CRPC	NA	50.1	58.5	362.7	9	NA	Hybrid Capture	BONE	NA	NA	NA	NA	NA	NA	NA	NA	NA	not_fused	not_fused	not_fused	not_fused
	961	phs000915	MO_1232	MO_1232	CRPC	NA	60.7	64.6	4.86	9	NA	Hybrid Capture	CHEST_WALL	NA	NA	NA	NA	NA	NA	NA	NA	NA	not_fused	not_fused	not_fused	not_fused
	962	phs000915	MO_1241	MO_1241	CRPC	NA	74.6	75	45.4	10	NA	Hybrid Capture	LIVER	NA	NA	NA	NA	NA	NA	NA	NA	NA	fused	not_fused	not_fused	not_fused
	963	phs000915	MO_1244	MO_1244	CRPC	NA	56.4	57.6	28.1	9	NA	Hybrid Capture	LIVER	NA	NA	NA	NA	NA	NA	NA	NA	NA	fused	not_fused	not_fused	not_fused
	964	phs000915	MO_1249	MO_1249	CRPC	NA	50.3	69.6	NA	NA	NA	Hybrid Capture	LYMPH_NODE	NA	NA	NA	NA	NA	NA	NA	NA	NA	fused	not_fused	not_fused	not_fused
	965	phs000915	MO_1262	MO_1262	CRPC	NA	47.1	52.7	15.7	7	NA	Hybrid Capture	LYMPH_NODE	NA	NA	NA	NA	NA	NA	NA	NA	NA	not_fused	not_fused	not_fused	fused
	966	phs000915	MO_1263	MO_1263	CRPC	NA	55.1	64.7	24.5	9	NA	Hybrid Capture	LYMPH_NODE	NA	NA	NA	NA	NA	NA	NA	NA	NA	fused	not_fused	not_fused	not_fused
	967	phs000915	MO_1277	MO_1277	CRPC	NA	45.8	54	3.2	8	NA	Hybrid Capture	BONE	NA	NA	NA	NA	NA	NA	NA	NA	NA	fused	not_fused	not_fused	not_fused
	968	phs000915	MO_1316	MO_1316	CRPC	NA	54.8	70	4.7	6	NA	Hybrid Capture	LYMPH_NODE	NA	NA	NA	NA	NA	NA	NA	NA	NA	fused	not_fused	not_fused	not_fused
	969	phs000915	MO_1336	MO_1336	CRPC	NA	57.6	75	NA	6	NA	Hybrid Capture	BONE	NA	NA	NA	NA	NA	NA	NA	NA	NA	not_fused	not_fused	not_fused	not_fused
	970	phs000915	MO_1337	MO_1337	CRPC	NA	60.6	62	11.66	7	NA	Hybrid Capture	LIVER	NA	NA	NA	NA	NA	NA	NA	NA	NA	fused	not_fused	not_fused	not_fused
	971	phs000915	MO_1339	MO_1339	CRPC	NA	77.1	78	19	8	NA	Hybrid Capture	LYMPH_NODE	NA	NA	NA	NA	NA	NA	NA	NA	NA	not_fused	not_fused	not_fused	not_fused
	972	phs000915	MO_1410	MO_1410	CRPC	NA	63.4	66	34.7	8	NA	Hybrid Capture	LIVER	NA	NA	NA	NA	NA	NA	NA	NA	NA	fused	not_fused	not_fused	not_fused
	973	phs000915	MO_1015	MO_1015	CRPC	NA	64.6	75	7.2	8	NA	Hybrid Capture	LYMPH_NODE	NA	NA	NA	NA	NA	NA	NA	NA	NA	fused	not_fused	not_fused	not_fused
	974	phs000915	TP_2001	TP_2001	CRPC	NA	NA	70	203.8	9	NA	Hybrid Capture	LYMPH_NODE	NA	NA	NA	NA	NA	NA	NA	NA	NA	fused	not_fused	not_fused	not_fused
	975	phs000915	TP_2009	TP_2009	CRPC	NA	NA	58	2.8	9	NA	Hybrid Capture	BONE	NA	NA	NA	NA	NA	NA	NA	NA	NA	not_fused	not_fused	not_fused	fused
	976	phs000915	TP_2010	TP_2010	CRPC	NA	NA	64	9.63	9	NA	Hybrid Capture	LYMPH_NODE	NA	NA	NA	NA	NA	NA	NA	NA	NA	not_fused	not_fused	not_fused	not_fused
	977	phs000915	TP_2020	TP_2020	CRPC	NA	NA	55	467	NA	NA	Hybrid Capture	BONE	NA	NA	NA	NA	NA	NA	NA	NA	NA	not_fused	not_fused	not_fused	fused
	978	phs000915	TP_2032	TP_2032	CRPC	NA	NA	74	15	9	NA	Hybrid Capture	LYMPH_NODE	NA	NA	NA	NA	NA	NA	NA	NA	NA	not_fused	not_fused	not_fused	not_fused
	979	phs000915	TP_2034	TP_2034	CRPC	NA	NA	50.1	15.93	9	NA	Hybrid Capture	BONE	NA	NA	NA	NA	NA	NA	NA	NA	NA	fused	not_fused	not_fused	not_fused
	980	phs000915	TP_2054	TP_2054	CRPC	NA	NA	70.7	6	10	NA	Hybrid Capture	LYMPH_NODE	NA	NA	NA	NA	NA	NA	NA	NA	NA	fused	not_fused	not_fused	not_fused
	981	phs000915	TP_2060	TP_2060	CRPC	NA	NA	72	29.4	10	NA	Hybrid Capture	LYMPH_NODE	NA	NA	NA	NA	NA	NA	NA	NA	NA	not_fused	not_fused	not_fused	not_fused
	982	phs000915	TP_2061	TP_2061	CRPC	NA	NA	64.7	NA	9	NA	Hybrid Capture	PELVIC_MASS	NA	NA	NA	NA	NA	NA	NA	NA	NA	not_fused	not_fused	not_fused	not_fused
	983	phs000915	TP_2064	TP_2064	CRPC	NA	NA	71	23	7	NA	Hybrid Capture	LYMPH_NODE	NA	NA	NA	NA	NA	NA	NA	NA	NA	not_fused	not_fused	not_fused	not_fused
	984	phs000915	MO_1040	MO_1040	CRPC	NA	50.5	68.1	23.6	7	NA	Hybrid Capture	LYMPH_NODE	NA	NA	NA	NA	NA	NA	NA	NA	NA	fused	not_fused	not_fused	not_fused
	985	phs000915	MO_1054	MO_1054	CRPC	NA	44.8	56	9.1	9	NA	Hybrid Capture	PROSTATE	NA	NA	NA	NA	NA	NA	NA	NA	NA	not_fused	not_fused	not_fused	fused
	986	phs000915	MO_1071	MO_1071	CRPC	NA	49.2	54	2.8	7	NA	Hybrid Capture	PROSTATE	NA	NA	NA	NA	NA	NA	NA	NA	NA	fused	not_fused	not_fused	not_fused
	987	phs000915	MO_1074	MO_1074	CRPC	NA	58.2	69	NA	7	NA	Hybrid Capture	BONE	NA	NA	NA	NA	NA	NA	NA	NA	NA	not_fused	not_fused	not_fused	not_fused
	988	phs000915	MO_1012	MO_1012	CRPC	NA	64.1	71.4	27.4	7	NA	Hybrid Capture	ABDOMINAL	NA	NA	NA	NA	NA	NA	NA	NA	NA	not_fused	not_fused	not_fused	not_fused
	989	phs000915	MO_1096	MO_1096	CRPC	NA	57.4	65.3	NA	8	NA	Hybrid Capture	BONE	NA	NA	NA	NA	NA	NA	NA	NA	NA	not_fused	not_fused	not_fused	not_fused
	990	phs000915	TP_2077	TP_2077	CRPC	NA	NA	66.2	NA	NA	NA	Poly(A+)	LYMPH_NODE	NA	NA	NA	NA	NA	NA	NA	NA	NA	NA	NA	NA	NA
	991	phs000915	TP_2078	TP_2078	CRPC	NA	NA	85	NA	NA	NA	Poly(A+)	LYMPH_NODE	NA	NA	NA	NA	NA	NA	NA	NA	NA	NA	NA	NA	NA
	992	phs000915	TP_2077	TP_2077	CRPC	NA	NA	66.2	NA	NA	NA	Hybrid Capture	LYMPH_NODE	NA	NA	NA	NA	NA	NA	NA	NA	NA	NA	NA	NA	NA
	993	phs000915	TP_2078	TP_2078	CRPC	NA	NA	85	NA	NA	NA	Hybrid Capture	LYMPH_NODE	NA	NA	NA	NA	NA	NA	NA	NA	NA	NA	NA	NA	NA
	994	phs000915	TP_2079	TP_2079	CRPC	NA	NA	65	NA	NA	NA	Hybrid Capture	BONE	NA	NA	NA	NA	NA	NA	NA	NA	NA	NA	NA	NA	NA
	995	phs000915	MO_1469	MO_1469	CRPC	NA	NA	65	NA	NA	NA	Poly(A+)	PELVIC_MASS	NA	NA	NA	NA	NA	NA	NA	NA	NA	NA	NA	NA	NA
	996	phs000915	MO_1469	MO_1469	CRPC	NA	NA	65	NA	NA	NA	Hybrid Capture	PELVIC_MASS	NA	NA	NA	NA	NA	NA	NA	NA	NA	NA	NA	NA	NA
	997	phs000915	TP_2081	TP_2081	CRPC	NA	NA	59.4	29.36	8	NA	Poly(A+)	BONE	NA	NA	NA	NA	NA	NA	NA	NA	NA	NA	NA	NA	NA
	998	phs000915	TP_2081	TP_2081	CRPC	NA	NA	59.4	29.36	8	NA	Hybrid Capture	BONE	NA	NA	NA	NA	NA	NA	NA	NA	NA	NA	NA	NA	NA
	999	phs000915	MO_1473	MO_1473	CRPC	NA	NA	76	NA	NA	NA	Hybrid Capture	BONE	NA	NA	NA	NA	NA	NA	NA	NA	NA	NA	NA	NA	NA
	1000	phs000915	TP_2093	TP_2093	CRPC	NA	NA	64	3.5	9	NA	Poly(A+)	LYMPH_NODE	NA	NA	NA	NA	NA	NA	NA	NA	NA	NA	NA	NA	NA
	1001	phs000915	TP_2093	TP_2093	CRPC	NA	NA	64	3.5	9	NA	Hybrid Capture	LYMPH_NODE	NA	NA	NA	NA	NA	NA	NA	NA	NA	NA	NA	NA	NA
	1002	phs000915	TP_2096	TP_2096	CRPC	NA	NA	53.4	NA	NA	NA	Poly(A+)	LYMPH_NODE	NA	NA	NA	NA	NA	NA	NA	NA	NA	NA	NA	NA	NA
	1003	phs000915	TP_2096	TP_2096	CRPC	NA	NA	53.4	NA	NA	NA	Hybrid Capture	LYMPH_NODE	NA	NA	NA	NA	NA	NA	NA	NA	NA	NA	NA	NA	NA
	1004	phs000915	MO_1492	MO_1492	CRPC	NA	NA	58.2	NA	NA	NA	Poly(A+)	ABDOMINAL	NA	NA	NA	NA	NA	NA	NA	NA	NA	NA	NA	NA	NA
	1005	phs000915	MO_1492	MO_1492	CRPC	NA	NA	58.2	NA	NA	NA	Hybrid Capture	ABDOMINAL	NA	NA	NA	NA	NA	NA	NA	NA	NA	NA	NA	NA	NA
	1006	phs000915	MO_1490	MO_1490	CRPC	NA	NA	74	NA	NA	NA	Hybrid Capture	BONE	NA	NA	NA	NA	NA	NA	NA	NA	NA	NA	NA	NA	NA
	1007	phs000915	MO_1499	MO_1499	CRPC	NA	NA	72.2	NA	NA	NA	Hybrid Capture	BONE	NA	NA	NA	NA	NA	NA	NA	NA	NA	NA	NA	NA	NA
	1008	phs000915	MO_1510	MO_1510	CRPC	NA	NA	63.3	NA	NA	NA	Poly(A+)	LYMPH_NODE	NA	NA	NA	NA	NA	NA	NA	NA	NA	NA	NA	NA	NA
	1009	phs000915	MO_1511	MO_1511	CRPC	NA	NA	NA	NA	NA	NA	Poly(A+)	LYMPH_NODE	NA	NA	NA	NA	NA	NA	NA	NA	NA	NA	NA	NA	NA
	1010	phs000915	MO_1514	MO_1514	CRPC	NA	NA	NA	NA	NA	NA	Poly(A+)	LYMPH_NODE	NA	NA	NA	NA	NA	NA	NA	NA	NA	NA	NA	NA	NA
	1011	phs000915	MO_1510	MO_1510	CRPC	NA	NA	63.3	NA	NA	NA	Hybrid Capture	LYMPH_NODE	NA	NA	NA	NA	NA	NA	NA	NA	NA	NA	NA	NA	NA
	1012	phs000915	MO_1511	MO_1511	CRPC	NA	NA	NA	NA	NA	NA	Hybrid Capture	LYMPH_NODE	NA	NA	NA	NA	NA	NA	NA	NA	NA	NA	NA	NA	NA
	1013	phs000915	MO_1514	MO_1514	CRPC	NA	NA	NA	NA	NA	NA	Hybrid Capture	LYMPH_NODE	NA	NA	NA	NA	NA	NA	NA	NA	NA	NA	NA	NA	NA
	1014	phs000915	MO_1517	MO_1517	CRPC	NA	NA	NA	NA	NA	NA	Hybrid Capture	ADRENAL	NA	NA	NA	NA	NA	NA	NA	NA	NA	NA	NA	NA	NA
	1015	phs000915	MO_1482	MO_1482	CRPC	NA	NA	NA	NA	NA	NA	Poly(A+)	LIVER	NA	NA	NA	NA	NA	NA	NA	NA	NA	NA	NA	NA	NA
	1016	phs000915	MO_1482	MO_1482	CRPC	NA	NA	NA	NA	NA	NA	Hybrid Capture	LIVER	NA	NA	NA	NA	NA	NA	NA	NA	NA	NA	NA	NA	NA
	1017	phs000915	MO_1541	MO_1541	CRPC	NA	NA	NA	NA	NA	NA	Hybrid Capture	LIVER	NA	NA	NA	NA	NA	NA	NA	NA	NA	NA	NA	NA	NA
	1018	phs000915	MO_1543	MO_1543	CRPC	NA	NA	60.5	NA	NA	NA	Hybrid Capture	LIVER	NA	NA	NA	NA	NA	NA	NA	NA	NA	NA	NA	NA	NA
	1019	phs000915	MO_1553	MO_1553	CRPC	NA	NA	56	NA	NA	NA	Hybrid Capture	LYMPH_NODE	NA	NA	NA	NA	NA	NA	NA	NA	NA	NA	NA	NA	NA
	1020	phs000915	MO_1556	MO_1556	CRPC	NA	NA	NA	NA	NA	NA	Poly(A+)	LYMPH_NODE	NA	NA	NA	NA	NA	NA	NA	NA	NA	NA	NA	NA	NA
	1021	phs000915	MO_1556	MO_1556	CRPC	NA	NA	NA	NA	NA	NA	Hybrid Capture	LYMPH_NODE	NA	NA	NA	NA	NA	NA	NA	NA	NA	NA	NA	NA	NA
	1022	phs000915	MO_1176	MO_1176	CRPC	NA	55.2	55.3	NA	10	NA	Hybrid Capture	LYMPH_NODE	NA	NA	NA	NA	NA	NA	NA	NA	NA	fused	not_fused	not_fused	not_fused
	1023	phs000915	MO_1219	MO_1219	CRPC	NA	65.9	67.5	16.3	7	NA	Poly(A+)	BONE	NA	NA	NA	NA	NA	NA	NA	NA	NA	not_fused	not_fused	not_fused	not_fused
	1024	phs000915	MO_1221	MO_1221	CRPC	NA	50.1	58.5	362.7	9	NA	Poly(A+)	BONE	NA	NA	NA	NA	NA	NA	NA	NA	NA	not_fused	not_fused	not_fused	not_fused
	1025	phs000915	MO_1420	MO_1420	CRPC	NA	59.6	63	52.7	9	NA	Poly(A+)	BONE	NA	NA	NA	NA	NA	NA	NA	NA	NA	NA	NA	NA	NA
	1026	phs000915	MO_1421	MO_1421	CRPC	NA	54	56	5.26	9	NA	Poly(A+)	BONE	NA	NA	NA	NA	NA	NA	NA	NA	NA	NA	NA	NA	NA
	1027	phs000915	MO_1420	MO_1420	CRPC	NA	59.6	63	52.7	9	NA	Hybrid Capture	BONE	NA	NA	NA	NA	NA	NA	NA	NA	NA	NA	NA	NA	NA
	1028	phs000915	MO_1421	MO_1421	CRPC	NA	54	56	5.26	9	NA	Hybrid Capture	BONE	NA	NA	NA	NA	NA	NA	NA	NA	NA	NA	NA	NA	NA
	1029	phs000915	TP_2069	TP_2069	CRPC	NA	NA	65.8	24.37	9	NA	Poly(A+)	LYMPH_NODE	NA	NA	NA	NA	NA	NA	NA	NA	NA	NA	NA	NA	NA
	1030	phs000915	TP_2069	TP_2069	CRPC	NA	NA	65.8	24.37	9	NA	Hybrid Capture	LYMPH_NODE	NA	NA	NA	NA	NA	NA	NA	NA	NA	NA	NA	NA	NA
	1031	phs000915	MO_1447	MO_1447	CRPC	NA	57.2	58	46.74	9	NA	Poly(A+)	LYMPH_NODE	NA	NA	NA	NA	NA	NA	NA	NA	NA	NA	NA	NA	NA
	1032	phs000915	MO_1447	MO_1447	CRPC	NA	57.2	58	46.74	9	NA	Hybrid Capture	LYMPH_NODE	NA	NA	NA	NA	NA	NA	NA	NA	NA	NA	NA	NA	NA
	1033	phs000915	MO_1460	MO_1460	CRPC	NA	61.5	64	4.8	9	NA	Poly(A+)	LIVER	NA	NA	NA	NA	NA	NA	NA	NA	NA	NA	NA	NA	NA
	1034	phs000915	MO_1460	MO_1460	CRPC	NA	61.5	64	4.8	9	NA	Hybrid Capture	LIVER	NA	NA	NA	NA	NA	NA	NA	NA	NA	NA	NA	NA	NA
	1035	phs000673	MO_1008	MO_1008	CRPC	NA	44.5	47.9	1049.6	8	NA	Hybrid Capture	DURA	NA	NA	NA	NA	NA	NA	NA	NA	NA	not_fused	not_fused	not_fused	not_fused
	1036	phs000673	MO_1066	MO_1066	CRPC	NA	NA	NA	NA	NA	NA	Hybrid Capture	NECK	NA	NA	NA	NA	NA	NA	NA	NA	NA	NA	NA	NA	NA
	1037	phs000673	MO_1093	MO_1093	CRPC	NA	NA	NA	NA	NA	NA	Hybrid Capture	LYMPH_NODE	NA	NA	NA	NA	NA	NA	NA	NA	NA	NA	NA	NA	NA
	1038	phs000673	MO_1112	MO_1112	CRPC	NA	NA	NA	NA	NA	NA	Hybrid Capture	BONE	NA	NA	NA	NA	NA	NA	NA	NA	NA	NA	NA	NA	NA
	1039	phs000673	MO_1132	MO_1132	CRPC	NA	NA	NA	NA	NA	NA	Hybrid Capture	BONE	NA	NA	NA	NA	NA	NA	NA	NA	NA	NA	NA	NA	NA
	1040	phs000673	MO_1200	MO_1200	CRPC	NA	NA	NA	NA	NA	NA	Hybrid Capture	LYMPH_NODE	NA	NA	NA	NA	NA	NA	NA	NA	NA	NA	NA	NA	NA
	1041	phs000673	MO_1201	MO_1201	CRPC	NA	NA	NA	NA	NA	NA	Hybrid Capture	BONE	NA	NA	NA	NA	NA	NA	NA	NA	NA	NA	NA	NA	NA
	1042	phs000673	MO_1240	MO_1240	CRPC	NA	NA	NA	NA	NA	NA	Hybrid Capture	BONE	NA	NA	NA	NA	NA	NA	NA	NA	NA	NA	NA	NA	NA
	1043	phs000673	MO_1260	MO_1260	CRPC	NA	NA	NA	NA	NA	NA	Hybrid Capture	LYMPH_NODE	NA	NA	NA	NA	NA	NA	NA	NA	NA	NA	NA	NA	NA
	1044	phs000673	MO_1316	MO_1316	CRPC	NA	54.8	70	4.7	6	NA	Hybrid Capture	LYMPH_NODE	NA	NA	NA	NA	NA	NA	NA	NA	NA	fused	not_fused	not_fused	not_fused
	1045	phs000673	MO_1437	MO_1437	CRPC	NA	NA	NA	NA	NA	NA	Hybrid Capture	LIVER	NA	NA	NA	NA	NA	NA	NA	NA	NA	NA	NA	NA	NA
	1046	phs000673	MO_1443	MO_1443	CRPC	NA	NA	63	NA	NA	NA	Hybrid Capture	BONE	NA	NA	NA	NA	NA	NA	NA	NA	NA	NA	NA	NA	NA
	1047	phs000673	MO_1446	MO_1446	CRPC	NA	NA	57	NA	NA	NA	Hybrid Capture	BONE	NA	NA	NA	NA	NA	NA	NA	NA	NA	NA	NA	NA	NA
	1048	phs000673	MO_1472	MO_1472	CRPC	NA	NA	NA	NA	NA	NA	Hybrid Capture	LYMPH_NODE	NA	NA	NA	NA	NA	NA	NA	NA	NA	NA	NA	NA	NA
	1049	phs000673	MO_1492	MO_1492	CRPC	NA	NA	58.2	NA	NA	NA	Hybrid Capture	ABDOMINAL	NA	NA	NA	NA	NA	NA	NA	NA	NA	NA	NA	NA	NA
	1050	phs000673	MO_1496	MO_1496	CRPC	NA	NA	NA	NA	NA	NA	Hybrid Capture	LYMPH_NODE	NA	NA	NA	NA	NA	NA	NA	NA	NA	NA	NA	NA	NA
	1051	phs000673	MO_1541	MO_1541	CRPC	NA	NA	NA	NA	NA	NA	Hybrid Capture	LIVER	NA	NA	NA	NA	NA	NA	NA	NA	NA	NA	NA	NA	NA
	1052	phs000673	TP_2037	TP_2037	CRPC	NA	NA	NA	NA	NA	NA	Hybrid Capture	LYMPH_NODE	NA	NA	NA	NA	NA	NA	NA	NA	NA	NA	NA	NA	NA
	1053	phs000673	TP_2080	TP_2080	CRPC	NA	NA	NA	NA	NA	NA	Hybrid Capture	PROSTATE	NA	NA	NA	NA	NA	NA	NA	NA	NA	NA	NA	NA	NA
	1054	phs000673	TP_2090	TP_2090	CRPC	NA	NA	NA	NA	NA	NA	Hybrid Capture	BONE	NA	NA	NA	NA	NA	NA	NA	NA	NA	NA	NA	NA	NA
	1055	phs000673	TP_2156	TP_2156	CRPC	NA	NA	NA	NA	NA	NA	Hybrid Capture	LIVER	NA	NA	NA	NA	NA	NA	NA	NA	NA	NA	NA	NA	NA
	1056	phs000673	MO_1234	MO_1234	CRPC	NA	NA	NA	NA	NA	NA	Hybrid Capture	LYMPH_NODE	NA	NA	NA	NA	NA	NA	NA	NA	NA	NA	NA	NA	NA
	1057	phs000673	MO_1584	MO_1584	CRPC	NA	NA	NA	NA	NA	NA	Hybrid Capture	PERITONEAL	NA	NA	NA	NA	NA	NA	NA	NA	NA	NA	NA	NA	NA
	1058	phs000673	MO_1608	MO_1608	CRPC	NA	NA	NA	NA	NA	NA	Hybrid Capture	LYMPH_NODE	NA	NA	NA	NA	NA	NA	NA	NA	NA	NA	NA	NA	NA
	1059	phs000673	MO_1635	MO_1635	CRPC	NA	NA	NA	NA	NA	NA	Hybrid Capture	BONE	NA	NA	NA	NA	NA	NA	NA	NA	NA	NA	NA	NA	NA
	1060	phs000673	MO_1637	MO_1637	CRPC	NA	NA	NA	NA	NA	NA	Hybrid Capture	LIVER	NA	NA	NA	NA	NA	NA	NA	NA	NA	NA	NA	NA	NA
	1061	phs000673	MO_1644	MO_1644	CRPC	NA	NA	NA	NA	NA	NA	Hybrid Capture	BONE	NA	NA	NA	NA	NA	NA	NA	NA	NA	NA	NA	NA	NA
	1062	phs000673	MO_1649	MO_1649	CRPC	NA	NA	NA	NA	NA	NA	Hybrid Capture	LYMPH_NODE	NA	NA	NA	NA	NA	NA	NA	NA	NA	NA	NA	NA	NA
	1063	phs000673	MO_1670	MO_1670	CRPC	NA	NA	NA	NA	NA	NA	Hybrid Capture	LYMPH_NODE	NA	NA	NA	NA	NA	NA	NA	NA	NA	NA	NA	NA	NA
	1064	phs000673	MO_1674	MO_1674	CRPC	NA	NA	NA	NA	NA	NA	Hybrid Capture	LYMPH_NODE	NA	NA	NA	NA	NA	NA	NA	NA	NA	NA	NA	NA	NA
	1065	phs000673	MO_1752	MO_1752	CRPC	NA	NA	NA	NA	NA	NA	Hybrid Capture	LIVER	NA	NA	NA	NA	NA	NA	NA	NA	NA	NA	NA	NA	NA
	1066	phs000673	MO_1788	MO_1788	CRPC	NA	NA	NA	NA	NA	NA	Hybrid Capture	LIVER	NA	NA	NA	NA	NA	NA	NA	NA	NA	NA	NA	NA	NA
	1067	phs000673	MO_1811	MO_1811	CRPC	NA	NA	NA	NA	NA	NA	Hybrid Capture	L.SUPRACLAVICULAR	NA	NA	NA	NA	NA	NA	NA	NA	NA	NA	NA	NA	NA
	1068	phs000673	MO_1812	MO_1812	CRPC	NA	NA	NA	NA	NA	NA	Hybrid Capture	LIVER	NA	NA	NA	NA	NA	NA	NA	NA	NA	NA	NA	NA	NA
	1069	phs000673	MO_1814	MO_1814	CRPC	NA	NA	NA	NA	NA	NA	Hybrid Capture	LIVER	NA	NA	NA	NA	NA	NA	NA	NA	NA	NA	NA	NA	NA
	1070	phs000673	MO_1901	MO_1901	CRPC	NA	NA	NA	NA	NA	NA	Hybrid Capture	LIVER	NA	NA	NA	NA	NA	NA	NA	NA	NA	NA	NA	NA	NA
	1071	phs000673	MO_1909	MO_1909	CRPC	NA	NA	NA	NA	NA	NA	Hybrid Capture	ADRENAL	NA	NA	NA	NA	NA	NA	NA	NA	NA	NA	NA	NA	NA
	1072	phs000673	MO_1941	MO_1941	CRPC	NA	NA	NA	NA	NA	NA	Hybrid Capture	LIVER	NA	NA	NA	NA	NA	NA	NA	NA	NA	NA	NA	NA	NA
	1073	phs000673	TP_2249	TP_2249	CRPC	NA	NA	NA	NA	NA	NA	Hybrid Capture	BONE	NA	NA	NA	NA	NA	NA	NA	NA	NA	NA	NA	NA	NA
	1074	phs000673	TP_2278	TP_2278	CRPC	NA	NA	NA	NA	NA	NA	Hybrid Capture	BONE	NA	NA	NA	NA	NA	NA	NA	NA	NA	NA	NA	NA	NA
	1075	phs000909	WCMC90	WCMC90_2_C	CRPC	NA	NA	NA	NA	NA	NA	Poly(A+)	LYMPH_NODE	NA	NA	NA	NA	NA	NA	NA	NA	NA	not_fused	NA	NA	NA
	1076	phs000909	WCMC0	WCMC0_5_N	NEPC	NA	NA	NA	NA	NA	NA	Poly(A+)	LIVER	NA	NA	NA	NA	NA	NA	NA	NA	NA	not_fused	NA	NA	NA
	1077	phs000909	WCMC210	WCMC210_1_N	NEPC	NA	NA	NA	NA	NA	NA	Poly(A+)	LYMPH_NODE	NA	NA	NA	NA	NA	NA	NA	NA	NA	not_fused	NA	NA	NA
	1078	phs000909	WCMC90	WCMC90_4_C	CRPC	NA	NA	NA	NA	NA	NA	Poly(A+)	LYMPH_NODE	NA	NA	NA	NA	NA	NA	NA	NA	NA	not_fused	NA	NA	NA
	1079	phs000909	WCMC172	WCMC172_1_C	CRPC	NA	NA	NA	NA	NA	NA	Poly(A+)	BONE	NA	NA	NA	NA	NA	NA	NA	NA	NA	not_fused	NA	NA	NA
	1080	phs000909	WCMC159	WCMC159_5_C	CRPC	NA	NA	NA	NA	NA	NA	Poly(A+)	LYMPH_NODE	NA	NA	NA	NA	NA	NA	NA	NA	NA	not_fused	NA	NA	NA
	1081	phs000909	WCMC252	WCMC252_1_N	NEPC	NA	NA	NA	NA	NA	NA	Poly(A+)	LIVER	NA	NA	NA	NA	NA	NA	NA	NA	NA	fused	NA	NA	NA
	1082	phs000909	WCMC163	WCMC163_1_N	NEPC	NA	NA	NA	NA	NA	NA	Poly(A+)	LIVER	NA	NA	NA	NA	NA	NA	NA	NA	NA	not_fused	NA	NA	NA
	1083	phs000909	WCMC9	WCMC9_1_C	CRPC	NA	NA	NA	NA	NA	NA	Poly(A+)	BONE	NA	NA	NA	NA	NA	NA	NA	NA	NA	not_fused	NA	NA	NA
	1084	phs000909	WCMC4240	WCMC4240_1_N	NEPC	NA	NA	NA	NA	NA	NA	Poly(A+)	LUNG	NA	NA	NA	NA	NA	NA	NA	NA	NA	not_fused	NA	NA	NA
	1085	phs000909	WCMC7520	WCMC7520_1_N	NEPC	NA	NA	NA	NA	NA	NA	Poly(A+)	PROSTATE	NA	NA	NA	NA	NA	NA	NA	NA	NA	fused	NA	NA	NA
	1086	phs000909	WCMC164	WCMC164_1_C	CRPC	NA	NA	NA	NA	NA	NA	Poly(A+)	BONE	NA	NA	NA	NA	NA	NA	NA	NA	NA	fused	NA	NA	NA
	1087	phs000909	WCMC131	WCMC131_1_C	CRPC	NA	NA	NA	NA	NA	NA	Poly(A+)	BONE	NA	NA	NA	NA	NA	NA	NA	NA	NA	not_fused	NA	NA	NA
	1088	phs000909	WCMC0	WCMC0_8_N	NEPC	NA	NA	NA	NA	NA	NA	Poly(A+)	PELVIC_MASS	NA	NA	NA	NA	NA	NA	NA	NA	NA	not_fused	NA	NA	NA
	1089	phs000909	WCMC159	WCMC159_1_C	CRPC	NA	NA	NA	NA	NA	NA	Poly(A+)	ADRENAL	NA	NA	NA	NA	NA	NA	NA	NA	NA	not_fused	NA	NA	NA
	1090	phs000909	WCMC162	WCMC162_1_C	CRPC	NA	NA	NA	NA	NA	NA	Poly(A+)	LUNG	NA	NA	NA	NA	NA	NA	NA	NA	NA	not_fused	NA	NA	NA
	1091	phs000909	WCMC89	WCMC89_1_C	CRPC	NA	NA	NA	NA	NA	NA	Poly(A+)	LYMPH_NODE	NA	NA	NA	NA	NA	NA	NA	NA	NA	fused	NA	NA	NA
	1092	phs000909	WCMC59	WCMC59_1_C	CRPC	NA	NA	NA	NA	NA	NA	Poly(A+)	LIVER	NA	NA	NA	NA	NA	NA	NA	NA	NA	not_fused	NA	NA	NA
	1093	phs000909	WCMC14	WCMC14_1_C	CRPC	NA	NA	NA	NA	NA	NA	Poly(A+)	PROSTATE	NA	NA	NA	NA	NA	NA	NA	NA	NA	not_fused	NA	NA	NA
	1094	phs000909	WCMC91	WCMC91_1_C	CRPC	NA	NA	NA	NA	NA	NA	Poly(A+)	BONE	NA	NA	NA	NA	NA	NA	NA	NA	NA	fused	NA	NA	NA
	1095	phs000909	WCMC159	WCMC159_3_C	CRPC	NA	NA	NA	NA	NA	NA	Poly(A+)	LUNG	NA	NA	NA	NA	NA	NA	NA	NA	NA	not_fused	NA	NA	NA
	1096	phs000909	WCMC189	WCMC189_1_C	CRPC	NA	NA	NA	NA	NA	NA	Poly(A+)	LYMPH_NODE	NA	NA	NA	NA	NA	NA	NA	NA	NA	not_fused	NA	NA	NA
	1097	phs000909	WCMC159	WCMC159_2_C	CRPC	NA	NA	NA	NA	NA	NA	Poly(A+)	LYMPH_NODE	NA	NA	NA	NA	NA	NA	NA	NA	NA	not_fused	NA	NA	NA
	1098	phs000909	WCMC2	WCMC2_1_C	CRPC	NA	NA	NA	NA	NA	NA	Poly(A+)	LYMPH_NODE	NA	NA	NA	NA	NA	NA	NA	NA	NA	not_fused	NA	NA	NA
	1099	phs000909	WCMC161	WCMC161_1_C	CRPC	NA	NA	NA	NA	NA	NA	Poly(A+)	LYMPH_NODE	NA	NA	NA	NA	NA	NA	NA	NA	NA	fused	NA	NA	NA
	1100	phs000909	WCMC9	WCMC9_2_C	CRPC	NA	NA	NA	NA	NA	NA	Poly(A+)	PROSTATE	NA	NA	NA	NA	NA	NA	NA	NA	NA	not_fused	NA	NA	NA
	1101	phs000909	WCMC169	WCMC169_1_C	CRPC	NA	NA	NA	NA	NA	NA	Poly(A+)	PROSTATE	NA	NA	NA	NA	NA	NA	NA	NA	NA	fused	NA	NA	NA
	1102	phs000909	WCMC12	WCMC12_2_N	NEPC	NA	NA	NA	NA	NA	NA	Poly(A+)	BRAIN	NA	NA	NA	NA	NA	NA	NA	NA	NA	not_fused	NA	NA	NA
	1103	phs000909	WCMC158	WCMC158_1_C	CRPC	NA	NA	NA	NA	NA	NA	Poly(A+)	BONE	NA	NA	NA	NA	NA	NA	NA	NA	NA	not_fused	NA	NA	NA
	1104	phs000909	WCMC195	WCMC195_1_C	CRPC	NA	NA	NA	NA	NA	NA	Poly(A+)	PROSTATE	NA	NA	NA	NA	NA	NA	NA	NA	NA	not_fused	NA	NA	NA
	1105	phs000909	WCMC90	WCMC90_1_C	CRPC	NA	NA	NA	NA	NA	NA	Poly(A+)	LIVER	NA	NA	NA	NA	NA	NA	NA	NA	NA	not_fused	NA	NA	NA
	1106	phs000909	WCMC90	WCMC90_3_C	CRPC	NA	NA	NA	NA	NA	NA	Poly(A+)	LIVER	NA	NA	NA	NA	NA	NA	NA	NA	NA	not_fused	NA	NA	NA
	1107	phs000909	WCMC90	WCMC90_5_C	CRPC	NA	NA	NA	NA	NA	NA	Poly(A+)	BONE	NA	NA	NA	NA	NA	NA	NA	NA	NA	not_fused	NA	NA	NA
	1108	phs000909	WCMC170	WCMC170_1_C	CRPC	NA	NA	NA	NA	NA	NA	Poly(A+)	BONE	NA	NA	NA	NA	NA	NA	NA	NA	NA	not_fused	NA	NA	NA
	1109	phs000909	WCMC4	WCMC4_1_C	CRPC	NA	NA	NA	NA	NA	NA	Poly(A+)	BONE	NA	NA	NA	NA	NA	NA	NA	NA	NA	not_fused	NA	NA	NA
	1110	phs000909	WCMC11	WCMC11_1_C	CRPC	NA	NA	NA	NA	NA	NA	Poly(A+)	PROSTATE	NA	NA	NA	NA	NA	NA	NA	NA	NA	not_fused	NA	NA	NA
	1111	phs000909	WCMC119	WCMC119_1_C	CRPC	NA	NA	NA	NA	NA	NA	Poly(A+)	LYMPH_NODE	NA	NA	NA	NA	NA	NA	NA	NA	NA	fused	NA	NA	NA
	1112	phs000909	WCMC63	WCMC63_1_C	CRPC	NA	NA	NA	NA	NA	NA	Poly(A+)	PROSTATE	NA	NA	NA	NA	NA	NA	NA	NA	NA	not_fused	NA	NA	NA
	1113	phs000909	WCMC139	WCMC139_1_C	CRPC	NA	NA	NA	NA	NA	NA	Poly(A+)	BONE	NA	NA	NA	NA	NA	NA	NA	NA	NA	not_fused	NA	NA	NA
	1114	phs000909	WCMC0	WCMC0_6_N	NEPC	NA	NA	NA	NA	NA	NA	Poly(A+)	LIVER	NA	NA	NA	NA	NA	NA	NA	NA	NA	not_fused	NA	NA	NA
	1115	phs000909	WCMC159	WCMC159_6_C	CRPC	NA	NA	NA	NA	NA	NA	Poly(A+)	BONE	NA	NA	NA	NA	NA	NA	NA	NA	NA	not_fused	NA	NA	NA
	1116	phs000909	WCMC0	WCMC0_1_N	NEPC	NA	NA	NA	NA	NA	NA	Poly(A+)	PELVIC_MASS	NA	NA	NA	NA	NA	NA	NA	NA	NA	not_fused	NA	NA	NA
	1117	phs000909	WCMC212	WCMC212_1_N	NEPC	NA	NA	NA	NA	NA	NA	Poly(A+)	SOFT_TISSUE	NA	NA	NA	NA	NA	NA	NA	NA	NA	fused	NA	NA	NA
	1118	phs000909	WCMC0	WCMC0_9_N	NEPC	NA	NA	NA	NA	NA	NA	Poly(A+)	LYMPH_NODE	NA	NA	NA	NA	NA	NA	NA	NA	NA	not_fused	NA	NA	NA
	1119	phs000909	WCMC0	WCMC0_10_N	NEPC	NA	NA	NA	NA	NA	NA	Poly(A+)	LYMPH_NODE	NA	NA	NA	NA	NA	NA	NA	NA	NA	not_fused	NA	NA	NA
	1120	phs000909	WCMC187	WCMC187_1_C	CRPC	NA	NA	NA	NA	NA	NA	Poly(A+)	PROSTATE	NA	NA	NA	NA	NA	NA	NA	NA	NA	not_fused	NA	NA	NA
	1121	phs000909	WCMC192	WCMC192_1_N	NEPC	NA	NA	NA	NA	NA	NA	Poly(A+)	PROSTATE	NA	NA	NA	NA	NA	NA	NA	NA	NA	not_fused	NA	NA	NA
	1122	phs000909	WCMC188	WCMC188_1_C	CRPC	NA	NA	NA	NA	NA	NA	Poly(A+)	SKULL_BASE	NA	NA	NA	NA	NA	NA	NA	NA	NA	fused	NA	NA	NA
	1123	phs000909	WCMC155	WCMC155_1_N	NEPC	NA	NA	NA	NA	NA	NA	Poly(A+)	LIVER	NA	NA	NA	NA	NA	NA	NA	NA	NA	not_fused	NA	NA	NA
	1124	GSE118435	03-192	03-192C3_LN	CRPC	NA	NA	NA	NA	NA	NA	Poly(A+)	LYMPH_NODE	NA	NA	NA	NA	NA	NA	NA	NA	NA	NA	NA	NA	NA
	1125	GSE118435	11-028	11-028L3_LUNG	CRPC	NA	NA	NA	NA	NA	NA	Poly(A+)	LUNG	NA	NA	NA	NA	NA	NA	NA	NA	NA	NA	NA	NA	NA
	1126	GSE118435	12-005	12-005H6_LIVER	CRPC	NA	NA	NA	NA	NA	NA	Poly(A+)	LIVER	NA	NA	NA	NA	NA	NA	NA	NA	NA	NA	NA	NA	NA
	1127	GSE118435	12-005	12-005K3_RENAL	CRPC	NA	NA	NA	NA	NA	NA	Poly(A+)	RENAL	NA	NA	NA	NA	NA	NA	NA	NA	NA	NA	NA	NA	NA
	1128	GSE118435	12-011	12-011I8_LN	CRPC	NA	NA	NA	NA	NA	NA	Poly(A+)	LYMPH_NODE	NA	NA	NA	NA	NA	NA	NA	NA	NA	NA	NA	NA	NA
	1129	GSE118435	12-011	12-011J3_BLADDER	CRPC	NA	NA	NA	NA	NA	NA	Poly(A+)	BLADDER	NA	NA	NA	NA	NA	NA	NA	NA	NA	NA	NA	NA	NA
	1130	GSE118435	12-021	12-021FF6_BONE	CRPC	NA	NA	NA	NA	NA	NA	Poly(A+)	BONE	NA	NA	NA	NA	NA	NA	NA	NA	NA	NA	NA	NA	NA
	1131	GSE118435	12-021	12-021H6_LIVER	CRPC	NA	NA	NA	NA	NA	NA	Poly(A+)	LIVER	NA	NA	NA	NA	NA	NA	NA	NA	NA	NA	NA	NA	NA
	1132	GSE118435	12-021	12-021J3_PLEURAL	CRPC	NA	NA	NA	NA	NA	NA	Poly(A+)	PLEURAL	NA	NA	NA	NA	NA	NA	NA	NA	NA	NA	NA	NA	NA
	1133	GSE118435	13-012	13-012M3_LUNG	CRPC	NA	NA	NA	NA	NA	NA	Poly(A+)	LUNG	NA	NA	NA	NA	NA	NA	NA	NA	NA	NA	NA	NA	NA
	1134	GSE118435	13-084	13-084H5_LIVER	CRPC	NA	NA	NA	NA	NA	NA	Poly(A+)	LIVER	NA	NA	NA	NA	NA	NA	NA	NA	NA	NA	NA	NA	NA
	1135	GSE118435	13-099	13-099H7_LIVER	CRPC	NA	NA	NA	NA	NA	NA	Poly(A+)	LIVER	NA	NA	NA	NA	NA	NA	NA	NA	NA	NA	NA	NA	NA
	1136	GSE118435	13-099	13-099J2_LUNG	CRPC	NA	NA	NA	NA	NA	NA	Poly(A+)	LUNG	NA	NA	NA	NA	NA	NA	NA	NA	NA	NA	NA	NA	NA
	1137	GSE118435	13-101	13-101H1_LN	CRPC	NA	NA	NA	NA	NA	NA	Poly(A+)	LYMPH_NODE	NA	NA	NA	NA	NA	NA	NA	NA	NA	NA	NA	NA	NA
	1138	GSE118435	13-101	13-101K3_LN	CRPC	NA	NA	NA	NA	NA	NA	Poly(A+)	LYMPH_NODE	NA	NA	NA	NA	NA	NA	NA	NA	NA	NA	NA	NA	NA
	1139	GSE118435	13-104	13-104AA2_BONE	CRPC	NA	NA	NA	NA	NA	NA	Poly(A+)	BONE	NA	NA	NA	NA	NA	NA	NA	NA	NA	NA	NA	NA	NA
	1140	GSE118435	13-104	13-104K7_LN	CRPC	NA	NA	NA	NA	NA	NA	Poly(A+)	LYMPH_NODE	NA	NA	NA	NA	NA	NA	NA	NA	NA	NA	NA	NA	NA
	1141	GSE118435	13-122	13-122H1_PELVIC_MASS	CRPC	NA	NA	NA	NA	NA	NA	Poly(A+)	PELVIC_MASS	NA	NA	NA	NA	NA	NA	NA	NA	NA	NA	NA	NA	NA
	1142	GSE118435	14-039	14-039E3_LUNG	CRPC	NA	NA	NA	NA	NA	NA	Poly(A+)	LUNG	NA	NA	NA	NA	NA	NA	NA	NA	NA	NA	NA	NA	NA
	1143	GSE118435	14-039	14-039K4_LIVER	CRPC	NA	NA	NA	NA	NA	NA	Poly(A+)	LIVER	NA	NA	NA	NA	NA	NA	NA	NA	NA	NA	NA	NA	NA
	1144	GSE118435	14-043	14-043H6_LIVER	CRPC	NA	NA	NA	NA	NA	NA	Poly(A+)	LIVER	NA	NA	NA	NA	NA	NA	NA	NA	NA	NA	NA	NA	NA
	1145	GSE118435	14-053	14-053AA3_BONE	CRPC	NA	NA	NA	NA	NA	NA	Poly(A+)	BONE	NA	NA	NA	NA	NA	NA	NA	NA	NA	NA	NA	NA	NA
	1146	GSE118435	14-053	14-053H3_LIVER	CRPC	NA	NA	NA	NA	NA	NA	Poly(A+)	LIVER	NA	NA	NA	NA	NA	NA	NA	NA	NA	NA	NA	NA	NA
	1147	GSE118435	14-053	14-053O7_LN	CRPC	NA	NA	NA	NA	NA	NA	Poly(A+)	LYMPH_NODE	NA	NA	NA	NA	NA	NA	NA	NA	NA	NA	NA	NA	NA
	1148	GSE118435	14-077	14-077N15_LIVER	CRPC	NA	NA	NA	NA	NA	NA	Poly(A+)	LIVER	NA	NA	NA	NA	NA	NA	NA	NA	NA	NA	NA	NA	NA
	1149	GSE118435	14-091	14-091E1_LUNG	CRPC	NA	NA	NA	NA	NA	NA	Poly(A+)	LUNG	NA	NA	NA	NA	NA	NA	NA	NA	NA	NA	NA	NA	NA
	1150	GSE118435	15-003	15-003H1_LIVER	CRPC	NA	NA	NA	NA	NA	NA	Poly(A+)	LIVER	NA	NA	NA	NA	NA	NA	NA	NA	NA	NA	NA	NA	NA
	1151	GSE118435	15-010	15-010H1_LIVER	CRPC	NA	NA	NA	NA	NA	NA	Poly(A+)	LIVER	NA	NA	NA	NA	NA	NA	NA	NA	NA	NA	NA	NA	NA
	1152	GSE118435	15-010	15-010K4_LN	CRPC	NA	NA	NA	NA	NA	NA	Poly(A+)	LYMPH_NODE	NA	NA	NA	NA	NA	NA	NA	NA	NA	NA	NA	NA	NA
	1153	GSE118435	15-023	15-023AA1_BONE	CRPC	NA	NA	NA	NA	NA	NA	Poly(A+)	BONE	NA	NA	NA	NA	NA	NA	NA	NA	NA	NA	NA	NA	NA
	1154	GSE118435	15-023	15-023K2_SPLEEN	CRPC	NA	NA	NA	NA	NA	NA	Poly(A+)	SPLEEN	NA	NA	NA	NA	NA	NA	NA	NA	NA	NA	NA	NA	NA
	1155	GSE118435	15-023	15-023L2_LN	CRPC	NA	NA	NA	NA	NA	NA	Poly(A+)	LYMPH_NODE	NA	NA	NA	NA	NA	NA	NA	NA	NA	NA	NA	NA	NA
	1156	GSE118435	15-069	15-069K1_LIVER	CRPC	NA	NA	NA	NA	NA	NA	Poly(A+)	LIVER	NA	NA	NA	NA	NA	NA	NA	NA	NA	NA	NA	NA	NA
	1157	GSE118435	15-069	15-069P5_LN	CRPC	NA	NA	NA	NA	NA	NA	Poly(A+)	LYMPH_NODE	NA	NA	NA	NA	NA	NA	NA	NA	NA	NA	NA	NA	NA
	1158	GSE118435	15-090	15-090H1_LIVER	CRPC	NA	NA	NA	NA	NA	NA	Poly(A+)	LIVER	NA	NA	NA	NA	NA	NA	NA	NA	NA	NA	NA	NA	NA
	1159	GSE118435	15-090	15-090KK1_BONE	CRPC	NA	NA	NA	NA	NA	NA	Poly(A+)	BONE	NA	NA	NA	NA	NA	NA	NA	NA	NA	NA	NA	NA	NA
	1160	GSE118435	15-096	15-096FF1_BONE	CRPC	NA	NA	NA	NA	NA	NA	Poly(A+)	BONE	NA	NA	NA	NA	NA	NA	NA	NA	NA	NA	NA	NA	NA
	1161	GSE118435	16-052	16-052H1_LIVER	CRPC	NA	NA	NA	NA	NA	NA	Poly(A+)	LIVER	NA	NA	NA	NA	NA	NA	NA	NA	NA	NA	NA	NA	NA
	1162	GSE118435	16-052	16-052K1_LN	CRPC	NA	NA	NA	NA	NA	NA	Poly(A+)	LYMPH_NODE	NA	NA	NA	NA	NA	NA	NA	NA	NA	NA	NA	NA	NA
	1163	GSE118435	16-071	16-071H10_LIVER	CRPC	NA	NA	NA	NA	NA	NA	Poly(A+)	LIVER	NA	NA	NA	NA	NA	NA	NA	NA	NA	NA	NA	NA	NA
	1164	GSE118435	16-071	16-071I2_LUNG	CRPC	NA	NA	NA	NA	NA	NA	Poly(A+)	LUNG	NA	NA	NA	NA	NA	NA	NA	NA	NA	NA	NA	NA	NA
	1165	GSE126078	03-027	03-027P3_LIVER	CRPC	NA	NA	NA	NA	NA	NA	Poly(A+)	LIVER	NA	NA	NA	NA	NA	NA	NA	NA	NA	NA	NA	NA	NA
	1166	GSE126078	03-139	03-139E5_RETROPERITONEAL	CRPC	NA	NA	NA	NA	NA	NA	Poly(A+)	PERITONEAL	NA	NA	NA	NA	NA	NA	NA	NA	NA	NA	NA	NA	NA
	1167	GSE126078	03-139	03-139M5_RETROPERITONEAL	CRPC	NA	NA	NA	NA	NA	NA	Poly(A+)	PERITONEAL	NA	NA	NA	NA	NA	NA	NA	NA	NA	NA	NA	NA	NA
	1168	GSE126078	03-163	03-163S5_LIVER	CRPC	NA	NA	NA	NA	NA	NA	Poly(A+)	LIVER	NA	NA	NA	NA	NA	NA	NA	NA	NA	NA	NA	NA	NA
	1169	GSE126078	04-050	04-050P1_LN	CRPC	NA	NA	NA	NA	NA	NA	Poly(A+)	LYMPH_NODE	NA	NA	NA	NA	NA	NA	NA	NA	NA	NA	NA	NA	NA
	1170	GSE126078	04-050	04-050S1_LN	CRPC	NA	NA	NA	NA	NA	NA	Poly(A+)	LYMPH_NODE	NA	NA	NA	NA	NA	NA	NA	NA	NA	NA	NA	NA	NA
	1171	GSE126078	05-011	05-011D5_LN	CRPC	NA	NA	NA	NA	NA	NA	Poly(A+)	LYMPH_NODE	NA	NA	NA	NA	NA	NA	NA	NA	NA	NA	NA	NA	NA
	1172	GSE126078	05-011	05-011G2_LUNG	CRPC	NA	NA	NA	NA	NA	NA	Poly(A+)	LUNG	NA	NA	NA	NA	NA	NA	NA	NA	NA	NA	NA	NA	NA
	1173	GSE126078	05-144	05-144E6_LIVER	NEPC	NA	NA	NA	NA	NA	NA	Poly(A+)	LIVER	NA	NA	NA	NA	NA	NA	NA	NA	NA	NA	NA	NA	NA
	1174	GSE126078	05-144	05-144V3_ADRENAL	NEPC	NA	NA	NA	NA	NA	NA	Poly(A+)	ADRENAL	NA	NA	NA	NA	NA	NA	NA	NA	NA	NA	NA	NA	NA
	1175	GSE126078	05-165	05-165K1_LUNG	CRPC	NA	NA	NA	NA	NA	NA	Poly(A+)	LUNG	NA	NA	NA	NA	NA	NA	NA	NA	NA	NA	NA	NA	NA
	1176	GSE126078	05-165	05-165O1_ADRENAL	CRPC	NA	NA	NA	NA	NA	NA	Poly(A+)	ADRENAL	NA	NA	NA	NA	NA	NA	NA	NA	NA	NA	NA	NA	NA
	1177	GSE126078	05-214	05-214E2_LN	CRPC	NA	NA	NA	NA	NA	NA	Poly(A+)	LYMPH_NODE	NA	NA	NA	NA	NA	NA	NA	NA	NA	NA	NA	NA	NA
	1178	GSE126078	05-217	05-217F4_LN	CRPC	NA	NA	NA	NA	NA	NA	Poly(A+)	LYMPH_NODE	NA	NA	NA	NA	NA	NA	NA	NA	NA	NA	NA	NA	NA
	1179	GSE126078	05-217	05-217I3_LN	CRPC	NA	NA	NA	NA	NA	NA	Poly(A+)	LYMPH_NODE	NA	NA	NA	NA	NA	NA	NA	NA	NA	NA	NA	NA	NA
	1180	GSE126078	06-127	06-127G3_LN	CRPC	NA	NA	NA	NA	NA	NA	Poly(A+)	LYMPH_NODE	NA	NA	NA	NA	NA	NA	NA	NA	NA	NA	NA	NA	NA
	1181	GSE126078	06-131	06-131TT1_BONE	CRPC	NA	NA	NA	NA	NA	NA	Poly(A+)	BONE	NA	NA	NA	NA	NA	NA	NA	NA	NA	NA	NA	NA	NA
	1182	GSE126078	07-042	07-042K2_LN	CRPC	NA	NA	NA	NA	NA	NA	Poly(A+)	LYMPH_NODE	NA	NA	NA	NA	NA	NA	NA	NA	NA	NA	NA	NA	NA
	1183	GSE126078	07-042	07-042L3_ADRENAL	CRPC	NA	NA	NA	NA	NA	NA	Poly(A+)	ADRENAL	NA	NA	NA	NA	NA	NA	NA	NA	NA	NA	NA	NA	NA
	1184	GSE126078	08-020	08-020I2_DIAPHRAM	CRPC	NA	NA	NA	NA	NA	NA	Poly(A+)	DIAPHRAM	NA	NA	NA	NA	NA	NA	NA	NA	NA	NA	NA	NA	NA
	1185	GSE126078	08-020	08-020T1_LN	CRPC	NA	NA	NA	NA	NA	NA	Poly(A+)	LYMPH_NODE	NA	NA	NA	NA	NA	NA	NA	NA	NA	NA	NA	NA	NA
	1186	GSE126078	08-093	08-093H3_LN	CRPC	NA	NA	NA	NA	NA	NA	Poly(A+)	LYMPH_NODE	NA	NA	NA	NA	NA	NA	NA	NA	NA	NA	NA	NA	NA
	1187	GSE126078	10-013	10-013K4_DIAPHRAM	CRPC	NA	NA	NA	NA	NA	NA	Poly(A+)	DIAPHRAM	NA	NA	NA	NA	NA	NA	NA	NA	NA	NA	NA	NA	NA
	1188	GSE126078	10-013	10-013L2_LN	CRPC	NA	NA	NA	NA	NA	NA	Poly(A+)	LYMPH_NODE	NA	NA	NA	NA	NA	NA	NA	NA	NA	NA	NA	NA	NA
	1189	GSE126078	10-039	10-039G1_LN	CRPC	NA	NA	NA	NA	NA	NA	Poly(A+)	LYMPH_NODE	NA	NA	NA	NA	NA	NA	NA	NA	NA	NA	NA	NA	NA
	1190	GSE126078	10-056	10-056J1_LN	CRPC	NA	NA	NA	NA	NA	NA	Poly(A+)	LYMPH_NODE	NA	NA	NA	NA	NA	NA	NA	NA	NA	NA	NA	NA	NA
	1191	GSE126078	10-056	10-056K1_LIVER	CRPC	NA	NA	NA	NA	NA	NA	Poly(A+)	LIVER	NA	NA	NA	NA	NA	NA	NA	NA	NA	NA	NA	NA	NA
	1192	GSE126078	11-028	11-028G3_ADRENAL	CRPC	NA	NA	NA	NA	NA	NA	Poly(A+)	ADRENAL	NA	NA	NA	NA	NA	NA	NA	NA	NA	NA	NA	NA	NA
	1193	GSE126078	11-028	11-028H1_LIVER	CRPC	NA	NA	NA	NA	NA	NA	Poly(A+)	LIVER	NA	NA	NA	NA	NA	NA	NA	NA	NA	NA	NA	NA	NA
	1194	GSE126078	12-005	12-005I5_LIVER	CRPC	NA	NA	NA	NA	NA	NA	Poly(A+)	LIVER	NA	NA	NA	NA	NA	NA	NA	NA	NA	NA	NA	NA	NA
	1195	GSE126078	12-021	12-021I1_LUNG	CRPC	NA	NA	NA	NA	NA	NA	Poly(A+)	LUNG	NA	NA	NA	NA	NA	NA	NA	NA	NA	NA	NA	NA	NA
	1196	GSE126078	13-012	13-012L2_LIVER	CRPC	NA	NA	NA	NA	NA	NA	Poly(A+)	LIVER	NA	NA	NA	NA	NA	NA	NA	NA	NA	NA	NA	NA	NA
	1197	GSE126078	13-042	13-042M3_LN	CRPC	NA	NA	NA	NA	NA	NA	Poly(A+)	LYMPH_NODE	NA	NA	NA	NA	NA	NA	NA	NA	NA	NA	NA	NA	NA
	1198	GSE126078	13-104	13-104I3_LN	CRPC	NA	NA	NA	NA	NA	NA	Poly(A+)	LYMPH_NODE	NA	NA	NA	NA	NA	NA	NA	NA	NA	NA	NA	NA	NA
	1199	GSE126078	13-117	13-117H7_LIVER	CRPC	NA	NA	NA	NA	NA	NA	Poly(A+)	LIVER	NA	NA	NA	NA	NA	NA	NA	NA	NA	NA	NA	NA	NA
	1200	GSE126078	14-031	14-031H2_LIVER	CRPC	NA	NA	NA	NA	NA	NA	Poly(A+)	LIVER	NA	NA	NA	NA	NA	NA	NA	NA	NA	NA	NA	NA	NA
	1201	GSE126078	14-031	14-031L2_PLEURAL	CRPC	NA	NA	NA	NA	NA	NA	Poly(A+)	PLEURAL	NA	NA	NA	NA	NA	NA	NA	NA	NA	NA	NA	NA	NA
	1202	GSE126078	14-043	14-043CC3_BONE	CRPC	NA	NA	NA	NA	NA	NA	Poly(A+)	BONE	NA	NA	NA	NA	NA	NA	NA	NA	NA	NA	NA	NA	NA
	1203	GSE126078	14-053	14-053K7_LN	CRPC	NA	NA	NA	NA	NA	NA	Poly(A+)	LYMPH_NODE	NA	NA	NA	NA	NA	NA	NA	NA	NA	NA	NA	NA	NA
	1204	GSE126078	14-096	14-096J1_LEFT_POSTERIOR	CRPC	NA	NA	NA	NA	NA	NA	Poly(A+)	LEFT_POSTERIOR	NA	NA	NA	NA	NA	NA	NA	NA	NA	NA	NA	NA	NA
	1205	GSE126078	14-105	14-105J1_LIVER	CRPC	NA	NA	NA	NA	NA	NA	Poly(A+)	LIVER	NA	NA	NA	NA	NA	NA	NA	NA	NA	NA	NA	NA	NA
	1206	GSE126078	15-096	15-096L2_PERIAORTIC	CRPC	NA	NA	NA	NA	NA	NA	Poly(A+)	PERIAORTIC	NA	NA	NA	NA	NA	NA	NA	NA	NA	NA	NA	NA	NA
	1207	GSE126078	15-096	15-096M1_PERIAORTIC_DIAPHRAGM	CRPC	NA	NA	NA	NA	NA	NA	Poly(A+)	PERIAORTIC	NA	NA	NA	NA	NA	NA	NA	NA	NA	NA	NA	NA	NA
	1208	GSE126078	16-080	16-080L2_LIVER	NEPC	NA	NA	NA	NA	NA	NA	Poly(A+)	LIVER	NA	NA	NA	NA	NA	NA	NA	NA	NA	NA	NA	NA	NA
	1209	GSE126078	16-101	16-101J6_LIVER	CRPC	NA	NA	NA	NA	NA	NA	Poly(A+)	LIVER	NA	NA	NA	NA	NA	NA	NA	NA	NA	NA	NA	NA	NA
	1210	GSE126078	16-101	16-101N2_PARIETAL_DIAPHRAGM	CRPC	NA	NA	NA	NA	NA	NA	Poly(A+)	PARIETAL	NA	NA	NA	NA	NA	NA	NA	NA	NA	NA	NA	NA	NA
	1211	GSE126078	17-007	17-007H1_LIVER	CRPC	NA	NA	NA	NA	NA	NA	Poly(A+)	LIVER	NA	NA	NA	NA	NA	NA	NA	NA	NA	NA	NA	NA	NA
	1212	GSE126078	17-017	17-017H8_LIVER	CRPC	NA	NA	NA	NA	NA	NA	Poly(A+)	LIVER	NA	NA	NA	NA	NA	NA	NA	NA	NA	NA	NA	NA	NA
	1213	GSE126078	17-017	17-017N1_LUNG	NEPC	NA	NA	NA	NA	NA	NA	Poly(A+)	LUNG	NA	NA	NA	NA	NA	NA	NA	NA	NA	NA	NA	NA	NA
	1214	GSE126078	17-022	17-022K1_LIVER	CRPC	NA	NA	NA	NA	NA	NA	Poly(A+)	LIVER	NA	NA	NA	NA	NA	NA	NA	NA	NA	NA	NA	NA	NA
	1215	GSE126078	17-033	17-033H7_TAIL_OF_PANCREAS	CRPC	NA	NA	NA	NA	NA	NA	Poly(A+)	PANCREAS	NA	NA	NA	NA	NA	NA	NA	NA	NA	NA	NA	NA	NA
	1216	GSE126078	17-033	17-033J1_PANCREAS	CRPC	NA	NA	NA	NA	NA	NA	Poly(A+)	PANCREAS	NA	NA	NA	NA	NA	NA	NA	NA	NA	NA	NA	NA	NA
	1217	GSE126078	17-036	17-036H10_LIVER	CRPC	NA	NA	NA	NA	NA	NA	Poly(A+)	LIVER	NA	NA	NA	NA	NA	NA	NA	NA	NA	NA	NA	NA	NA
	1218	GSE126078	17-036	17-036L3_LN	CRPC	NA	NA	NA	NA	NA	NA	Poly(A+)	LYMPH_NODE	NA	NA	NA	NA	NA	NA	NA	NA	NA	NA	NA	NA	NA
	1219	GSE126078	17-036	17-036N6_LN	CRPC	NA	NA	NA	NA	NA	NA	Poly(A+)	LYMPH_NODE	NA	NA	NA	NA	NA	NA	NA	NA	NA	NA	NA	NA	NA
	1220	GSE126078	17-042	17-042H2_BONE	CRPC	NA	NA	NA	NA	NA	NA	Poly(A+)	BONE	NA	NA	NA	NA	NA	NA	NA	NA	NA	NA	NA	NA	NA
	1221	GSE126078	17-043	17-043I1_LN	CRPC	NA	NA	NA	NA	NA	NA	Poly(A+)	LYMPH_NODE	NA	NA	NA	NA	NA	NA	NA	NA	NA	NA	NA	NA	NA
	1222	GSE126078	17-043	17-043J1_PERIRECTAL_OMENTAL	CRPC	NA	NA	NA	NA	NA	NA	Poly(A+)	PERIRECTAL	NA	NA	NA	NA	NA	NA	NA	NA	NA	NA	NA	NA	NA
	1223	GSE126078	17-043	17-043K1_PELVIC_PERITONEAL	CRPC	NA	NA	NA	NA	NA	NA	Poly(A+)	PERITONEAL	NA	NA	NA	NA	NA	NA	NA	NA	NA	NA	NA	NA	NA
